# Supplementary material for: Metabolic disruption impairs ribosomal protein levels, resulting in enhanced aminoglycoside tolerance
Source: eLife. 2024 Aug 2;13:RP94903. doi: 10.7554/eLife.94903 (PMC11296704; doi:10.7554/eLife.94903)
Supplement: Supplementary file 3. [file elife-94903-supp3.xlsx]

## Sheet: Sheet1
Proteomics Data
Protein	Protein ID	Gene	Description	△nuoI_1	△nuoI_2	△nuoI_3	△gltA_1	△gltA_2	△gltA_3	△icd_1	△icd_2	△icd_3	△sucA_1	△sucA_2	△sucA_3	WT_1	WT_2	WT_3
sp|A0A385XJE6|INH21_ECOLI	A0A385XJE6	insH21	Transposase InsH for insertion sequence element IS5U	45560.6	64531.6	82854.1	71811.2	117210	73534	99989.3	20554	83712.3	99180.5	80112.9	82716.9	178795	119611	138000
sp|P00350|6PGD_ECOLI	P00350	gnd	6-phosphogluconate dehydrogenase, decarboxylating	1.86985e+06	2.59104e+06	4.0509e+06	4.52989e+06	4.99975e+06	4775648	6968684	1.77837e+06	3.48448e+06	5434090	6.25687e+06	4808583	8406895	5695896	5289472
sp|P00363|FRDA_ECOLI	P00363	frdA	Fumarate reductase flavoprotein subunit	65686.6	103689	156232	152220	159451	146010	262996	23739.8	133661	345862	311006	220059	616624	321105	251228
sp|P00393|NDH_ECOLI	P00393	ndh	Type II NADH:quinone oxidoreductase	33571.8	70706.6	103084	87916.9	142050	92832.5	356245	30525.6	105230	313946	307877	131852	462976	289000	490070
sp|P00448|SODM_ECOLI	P00448	sodA	Superoxide dismutase [Mn]	60661.1	54718.3	133560	132415	289742	278463	526731	47030.7	152045	259164	347518	327422	329317	206197	208015
sp|P00452|RIR1_ECOLI	P00452	nrdA	Ribonucleoside-diphosphate reductase 1 subunit alpha	183213	228388	360060	539222	904787	461088	2.34212e+06	270359	642593	1.19691e+06	1.40673e+06	453728	891396	1.06998e+06	1.02465e+06
sp|P00490|PHSM_ECOLI	P00490	malP	Maltodextrin phosphorylase	283623	408352	978296	583293	784833	696640	972755	179104	585146	824118	1.13318e+06	649521	1.03333e+06	687943	699881
sp|P00509|AAT_ECOLI	P00509	aspC	Aspartate aminotransferase	814353	870185	1.21079e+06	1.4821e+06	1.64633e+06	1.38211e+06	1.4355e+06	355873	1.20279e+06	2.22703e+06	2.15417e+06	1.60755e+06	1.97003e+06	1.67706e+06	1.46566e+06
sp|P00547|KHSE_ECOLI	P00547	thrB	Homoserine kinase	105205	98627.9	140944	120830	675198	56991.8	243459	10444.6	142407	125619	1.06982e+06	221514	99263.5	614401	83372.7
sp|P00561|AK1H_ECOLI	P00561	thrA	Bifunctional aspartokinase/homoserine dehydrogenase 1	87047.9	56395.9	106539	240610	178498	156007	231748	4549.45	153686	499365	409556	237288	532260	255247	287153
sp|P00579|RPOD_ECOLI	P00579	rpoD	RNA polymerase sigma factor RpoD	100672	42939.6	48976.4	223408	149775	186754	368559	15141.7	94131.6	297662	269313	118599	542871	225242	203299
sp|P00582|DPO1_ECOLI	P00582	polA	DNA polymerase I	56944.2	85005.6	65190	173869	573826	114439	1.2951e+06	33970.2	150232	408374	969401	172168	1.269e+06	294762	842395
sp|P00864|CAPP_ECOLI	P00864	ppc	Phosphoenolpyruvate carboxylase	158757	167694	232914	391241	421365	298855	454219	50209.4	216317	886002	1.03275e+06	453878	750703	400534	384748
sp|P00926|SDHD_ECOLI	P00926	dsdA	D-serine dehydratase	351102	471640	848471	537027	651524	560365	1.52415e+06	298544	803100	1.26681e+06	1181092	815530	1.16152e+06	1005220	707973
sp|P00934|THRC_ECOLI	P00934	thrC	Threonine synthase	66257.4	72528.7	158295	122629	181091	155113	401611	44704.9	333918	545111	479572	277233	458612	290735	217506
sp|P00946|MANA_ECOLI	P00946	manA	Mannose-6-phosphate isomerase	285109	337969	799957	443639	670567	578553	724285	112856	782536	864378	958947	680814	1.10989e+06	850038	704389
sp|P00954|SYW_ECOLI	P00954	trpS	Tryptophan--tRNA ligase	734122	200575	241591	373042	358785	332761	1.12851e+06	149687	933819	942051	1.25502e+06	396591	698588	458018	466151
sp|P00956|SYI_ECOLI	P00956	ileS	Isoleucine--tRNA ligase	375085	491037	519717	997835	949531	787526	2.01625e+06	270453	709655	1.56003e+06	1.76553e+06	819816	2323521	1.31107e+06	1.04588e+06
sp|P00957|SYA_ECOLI	P00957	alaS	Alanine--tRNA ligase	563350	763617	1.44691e+06	1.35387e+06	1.5976e+06	1.31049e+06	3.07746e+06	535839	1.23589e+06	2187989	2.9852e+06	1.91796e+06	3.24562e+06	1.70859e+06	1.85823e+06
sp|P00959|SYM_ECOLI	P00959	metG	Methionine--tRNA ligase	202125	356861	254463	603267	447104	527177	1188232	180090	439373	890036	767321	449731	1543300	805625	835165
sp|P00960|SYGA_ECOLI	P00960	glyQ	Glycine--tRNA ligase alpha subunit	99489.2	149975	224225	282575	261269	143131	601222	112610	289808	286407	369969	251628	594856	347063	293615
sp|P00961|SYGB_ECOLI	P00961	glyS	Glycine--tRNA ligase beta subunit	314573	415270	758476	818404	960510	803364	1.98081e+06	297713	727030	1732102	1.82208e+06	874966	2197746	1319048	1.28704e+06
sp|P00962|SYQ_ECOLI	P00962	glnS	Glutamine--tRNA ligase	244571	272993	545858	502445	814677	743909	960233	206272	464171	815775	889939	582910	1100016	811737	780707
sp|P00963|ASNA_ECOLI	P00963	asnA	Aspartate--ammonia ligase	86461.4	142697	212497	385119	503621	445359	377751	47894.9	218708	308846	368635	208671	426407	454942	390931
sp|P00968|CARB_ECOLI	P00968	carB	Carbamoyl-phosphate synthase large chain	378580	768746	517581	2.61063e+06	2.67835e+06	2.15649e+06	564979	65226.3	234672	102459	235975	87263.4	6.0543e+06	4298482	3.9103e+06
sp|P02358|RS6_ECOLI	P02358	rpsF	30S ribosomal protein S6	2.15324e+06	2.3402e+06	4.40406e+06	3.87234e+06	5022610	4923935	5268148	1.45516e+06	4743516	4418538	4638014	4.87325e+06	6.74384e+06	4.97589e+06	5807628
sp|P02359|RS7_ECOLI	P02359	rpsG	30S ribosomal protein S7	1.62808e+06	2153757	3.53446e+06	2449401	3.19476e+06	2802012	4.20757e+06	1.16195e+06	2476285	3.81588e+06	3615619	2.86648e+06	4.85389e+06	3.73604e+06	3743330
sp|P02413|RL15_ECOLI	P02413	rplO	50S ribosomal protein L15	1370296	1.53923e+06	1.55474e+06	1.66976e+06	2.09041e+06	1.61944e+06	3.65913e+06	973611	1.8159e+06	2.60285e+06	1.9064e+06	1.24523e+06	3.81242e+06	2151981	3.94393e+06
sp|P02925|RBSB_ECOLI	P02925	rbsB	Ribose import binding protein RbsB	1.90235e+06	3.31913e+06	4.80066e+06	4405416	6.39245e+06	5.75346e+06	4255262	1.08508e+06	4207252	6.00841e+06	7025990	6.19485e+06	5.68158e+06	5.29205e+06	4906687
sp|P02930|TOLC_ECOLI	P02930	tolC	Outer membrane protein TolC	50435	78530.9	172606	169520	220497	199322	402460	28224.9	167250	281160	280833	216668	350499	224450	193922
sp|P02943|LAMB_ECOLI	P02943	lamB	Maltoporin	22776.3	12184.4	63721.3	67906.2	80450.2	74744.7	118131	22598.2	22548.2	95145.6	201442	97276.6	41670.4	63740.5	44160.3
sp|P03817|MIOC_ECOLI	P03817	mioC	Protein MioC	11148.2	16606.1	54408.7	32446.7	62832.8	63914.8	88591.6	14568.5	42900.2	61010.4	69582.8	54617.2	77165.6	89597.7	86743.9
sp|P03841|MALM_ECOLI	P03841	malM	Maltose operon periplasmic protein	347519	623525	1.30185e+06	873150	1.07125e+06	973285	734183	165869	727839	978140	1.13213e+06	930438	1.1735e+06	975064	805521
sp|P04036|DAPB_ECOLI	P04036	dapB	4-hydroxy-tetrahydrodipicolinate reductase	255526	126068	375377	366766	215454	310356	421753	117028	225844	397373	386835	330502	424606	195553	405309
sp|P04079|GUAA_ECOLI	P04079	guaA	GMP synthase [glutamine-hydrolyzing]	238779	386325	455229	693876	744547	690476	1.84213e+06	245152	504528	981582	1.10793e+06	512286	2.42262e+06	1.10564e+06	1.08431e+06
sp|P04425|GSHB_ECOLI	P04425	gshB	Glutathione synthetase	68410.9	127206	246175	214769	327729	253242	472114	58598.2	168415	390954	361115	246786	534799	270012	284570
sp|P04693|TYRB_ECOLI	P04693	tyrB	Aromatic-amino-acid aminotransferase	122373	139233	394753	250780	274248	261900	610300	73356.8	375367	317383	364488	313534	347787	370262	315935
sp|P04805|SYE_ECOLI	P04805	gltX	Glutamate--tRNA ligase	287782	471819	1.0575e+06	833352	1.16516e+06	1.16458e+06	1.96411e+06	345023	880301	1.29776e+06	1.50898e+06	1168621	1.74046e+06	1.1725e+06	1.32962e+06
sp|P04825|AMPN_ECOLI	P04825	pepN	Aminopeptidase N	256548	363729	448566	470773	440085	513697	1.1614e+06	167002	449131	1181466	1.12026e+06	732505	1.26435e+06	639578	664161
sp|P04949|FLIC_ECOLI	P04949	fliC	Flagellin	8427999	11742701	13739488	14026874	21512238	13543973	5997050	1.09414e+06	11435933	15449593	20731910	18154764	21041404	23620938	13153825
sp|P04951|KDSB_ECOLI	P04951	kdsB	3-deoxy-manno-octulosonate cytidylyltransferase	62309.9	117198	421600	174454	393608	420722	329594	45742.9	333009	357182	374912	424392	565584	383543	461204
sp|P04982|RBSD_ECOLI	P04982	rbsD	D-ribose pyranase	32854.1	20923.8	28428.1	82609.9	139765	65506.6	268100	28823.1	23808.1	73513	93326.4	28765.8	168567	27883	71772
sp|P04983|RBSA_ECOLI	P04983	rbsA	Ribose import ATP-binding protein RbsA	48339.6	55597.4	76506.7	86250.1	80894.7	82221.3	200072	19529	74749.7	79850.6	61922.2	45251.5	82949	69945.7	73106.2
sp|P05020|PYRC_ECOLI	P05020	pyrC	Dihydroorotase	351560	638369	910939	1.09198e+06	1.45281e+06	1.45519e+06	528235	165558	674980	612504	640774	612963	1.16555e+06	1.44654e+06	1.4046e+06
sp|P05042|FUMC_ECOLI	P05042	fumC	Fumarate hydratase class II	137848	182828	167094	462025	593260	497062	277713	72710.8	91397.8	485940	521920	330260	425810	265387	198528
sp|P05055|PNP_ECOLI	P05055	pnp	Polyribonucleotide nucleotidyltransferase	842692	1.15245e+06	2.62091e+06	2.1316e+06	2.80997e+06	2.75426e+06	4.38016e+06	688853	1618406	2.99963e+06	3.25126e+06	2.53708e+06	4.94038e+06	2.47636e+06	2.98952e+06
sp|P05459|PDXB_ECOLI	P05459	pdxB	Erythronate-4-phosphate dehydrogenase	61960.7	71726.4	65078.4	149371	190362	123354	130946	42301.8	67054.8	143780	130027	151874	343090	149725	135031
sp|P05706|PTHA_ECOLI	P05706	srlB	PTS system glucitol/sorbitol-specific EIIA component	321920	488574	818869	368658	470663	430972	468449	47478.5	629763	713722	598791	641953	875384	672854	690888
sp|P05707|SRLD_ECOLI	P05707	srlD	Sorbitol-6-phosphate 2-dehydrogenase	199990	292307	418464	258368	306814	277238	455101	29901.4	354084	581123	535145	346691	836435	536375	482575
sp|P05852|TSAD_ECOLI	P05852	tsaD	tRNA N6-adenosine threonylcarbamoyltransferase	35095	58547.3	106931	74270.8	132843	112799	350399	50762.9	91673.2	163277	173007	111670	297614	165983	175202
sp|P06149|DLD_ECOLI	P06149	dld	Quinone-dependent D-lactate dehydrogenase	53542.5	94297.6	284150	223437	261117	290367	193264	5734	162711	417662	474923	336949	304075	252408	245384
sp|P06610|BTUE_ECOLI	P06610	btuE	Thioredoxin/glutathione peroxidase BtuE	88933.9	197236	380391	280042	422213	396125	402395	66965.1	239942	576117	623890	504070	453578	426069	373467
sp|P06612|TOP1_ECOLI	P06612	topA	DNA topoisomerase 1	228292	378269	360402	385025	440929	397165	680836	116671	327452	769656	572851	448981	618907	400885	397447
sp|P06616|ERA_ECOLI	P06616	era	GTPase Era	67922.7	65224.5	124803	113890	116271	116175	164459	36830	107414	135623	141851	130727	142892	128490	138126
sp|P06715|GSHR_ECOLI	P06715	gor	Glutathione reductase	177614	244402	480998	349725	477444	502803	634538	145393	318250	565483	628807	478011	694689	370198	479244
sp|P06959|ODP2_ECOLI	P06959	aceF	Dihydrolipoyllysine-residue acetyltransferase component of pyruvate dehydrogenase complex	818002	930169	1299855	1.34165e+06	1.48758e+06	1.12146e+06	2304508	464513	1161836	2.0282e+06	2.09476e+06	1231046	3.15479e+06	1.84986e+06	1.88118e+06
sp|P06968|DUT_ECOLI	P06968	dut	Deoxyuridine 5'-triphosphate nucleotidohydrolase	227540	246807	529011	414923	547426	545838	676916	149977	485838	414241	449579	441257	853403	577481	654829
sp|P06974|FLIM_ECOLI	P06974	fliM	Flagellar motor switch protein FliM	140980	224112	290729	271471	317727	199712	269756	54738.5	296306	575100	567115	291632	663878	351126	415668
sp|P06983|HEM3_ECOLI	P06983	hemC	Porphobilinogen deaminase	258049	342253	626508	412265	596374	578229	542035	215813	435377	548524	583371	586560	601569	604659	610536
sp|P06988|HISX_ECOLI	P06988	hisD	Histidinol dehydrogenase	78392.2	93924.9	140066	185905	284550	281990	69293.8	22935.9	123129	130885	167507	133204	108964	134108	71556.4
sp|P06996|OMPC_ECOLI	P06996	ompC	Outer membrane porin C	147946	153450	323397	230754	282674	260880	275344	69756.9	220980	253971	211940	310690	342803	245057	335631
sp|P06999|PFKB_ECOLI	P06999	pfkB	ATP-dependent 6-phosphofructokinase isozyme 2	64025.8	159849	175919	197125	140755	236874	330129	95461.7	187984	210089	200941	236455	234593	123064	203660
sp|P07004|PROA_ECOLI	P07004	proA	Gamma-glutamyl phosphate reductase	442278	531409	1.00144e+06	907260	989102	934724	861561	106142	1.04718e+06	1.49463e+06	975582	1.02785e+06	1329703	668384	630622
sp|P07012|RF2_ECOLI	P07012	prfB	Peptide chain release factor RF2	228784	231078	449301	452056	504098	447723	1.16163e+06	305000	676136	696003	649204	489125	1.11098e+06	471396	558404
sp|P07014|SDHB_ECOLI	P07014	sdhB	Succinate dehydrogenase iron-sulfur subunit	599322	1.03875e+06	3054038	2.86108e+06	4197289	3.9451e+06	2807713	323638	2036795	5.91502e+06	6.38938e+06	4.81237e+06	3.3963e+06	2.73066e+06	2.51072e+06
sp|P07017|MCP2_ECOLI	P07017	tar	Methyl-accepting chemotaxis protein II	85814.4	170838	425062	356429	435508	346935	76674.7	13184.3	161678	322575	319382	250647	504653	320989	340313
sp|P07024|USHA_ECOLI	P07024	ushA	Protein UshA	225578	309203	736484	554658	711541	685490	246462	63884.9	441433	791849	924125	780298	785896	609815	608184
sp|P07118|SYV_ECOLI	P07118	valS	Valine--tRNA ligase	268294	306841	340207	754581	771269	484580	972685	217377	418538	845910	1.13949e+06	499804	1.35461e+06	1.02524e+06	801950
sp|P07330|CHEB_ECOLI	P07330	cheB	Protein-glutamate methylesterase/protein-glutamine glutaminase	126432	107035	149577	112929	115770	146949	54547.7	10916	97962.3	124869	182542	220011	239179	100445	103126
sp|P07363|CHEA_ECOLI	P07363	cheA	Chemotaxis protein CheA	104964	178374	325513	457319	569771	485787	315777	37464.1	184883	571799	740194	391587	1.14855e+06	611341	641218
sp|P07395|SYFB_ECOLI	P07395	pheT	Phenylalanine--tRNA ligase beta subunit	474181	681360	507865	754704	845139	670753	1.45984e+06	318694	653553	1.37683e+06	1020712	944816	2082162	1.2976e+06	991634
sp|P07650|TYPH_ECOLI	P07650	deoA	Thymidine phosphorylase	98055.1	137688	243990	201202	239754	204140	468099	92502.3	209661	394445	435097	316921	400909	282526	268554
sp|P07813|SYL_ECOLI	P07813	leuS	Leucine--tRNA ligase	305759	392869	404351	733763	744952	620807	1.09296e+06	190673	550898	1.21604e+06	1.24099e+06	678366	1.93713e+06	945927	864481
sp|P07862|DDLB_ECOLI	P07862	ddlB	D-alanine--D-alanine ligase B	97996.5	130340	223388	173236	117448	188689	365112	105186	179615	298685	297118	183747	266189	212074	202762
sp|P07913|TDH_ECOLI	P07913	tdh	L-threonine 3-dehydrogenase	166605	223619	426399	350176	451469	441542	578160	129070	303552	456782	528336	401499	785722	398006	365535
sp|P08179|PUR3_ECOLI	P08179	purN	Phosphoribosylglycinamide formyltransferase	16518.3	20164	36348.6	24796.7	35757.8	31028.6	51168	13640.2	36436.5	44621.7	46297.6	36123.3	43751.2	42600.2	38481.4
sp|P08192|FOLC_ECOLI	P08192	folC	Dihydrofolate synthase/folylpolyglutamate synthase	45861.9	46520.7	39467.8	135951	63930	162948	227494	33464.5	89651.4	104555	148383	84537.1	204039	129100	92961.1
sp|P08244|PYRF_ECOLI	P08244	pyrF	Orotidine 5'-phosphate decarboxylase	34259.8	122025	289810	316131	589743	576437	608102	72566.3	302224	320408	369932	305795	875629	900092	792979
sp|P08245|YCIH_ECOLI	P08245	yciH	Uncharacterized protein YciH	41638.8	63535.4	86603.5	90145.1	125394	124512	144408	29524.6	76060.6	71355.9	66402.4	85559.9	125942	140954	145584
sp|P08312|SYFA_ECOLI	P08312	pheS	Phenylalanine--tRNA ligase alpha subunit	189025	200871	260962	383354	377346	301669	635172	128932	321274	590556	642566	364762	1.08129e+06	457430	479062
sp|P08331|CPDB_ECOLI	P08331	cpdB	2',3'-cyclic-nucleotide 2'-phosphodiesterase/3'-nucleotidase	166762	253952	663708	363425	659653	608960	276028	47536.3	375050	702937	918268	696340	829762	560488	521075
sp|P08337|MUTT_ECOLI	P08337	mutT	8-oxo-dGTP diphosphatase	20735.2	25537.6	40985.1	35829.2	19125.4	25530.3	50964.4	7963.64	53946.7	32267.1	45720.8	48889.8	66616.2	54113.8	59712.3
sp|P08373|MURB_ECOLI	P08373	murB	UDP-N-acetylenolpyruvoylglucosamine reductase	17088.5	30740	50183.7	37338.6	118147	59649.4	231949	39144.1	76242.8	124103	128830	58943.9	223011	167914	207754
sp|P08390|USG_ECOLI	P08390	usg	USG-1 protein	26743.3	41505.3	108430	43380.2	141521	128842	286776	22401.5	67278.5	161386	160380	113936	373627	137472	170382
sp|P08506|DACC_ECOLI	P08506	dacC	D-alanyl-D-alanine carboxypeptidase DacC	68064.2	84454.1	266574	113638	112006	182579	154396	21712	70856.8	355472	325292	467353	158554	75082.2	95574.9
sp|P08622|DNAJ_ECOLI	P08622	dnaJ	Chaperone protein DnaJ	396763	504565	914556	753519	763886	1.07166e+06	1.33386e+06	291206	955044	998132	1621218	1.05172e+06	1.41856e+06	843297	972767
sp|P08839|PT1_ECOLI	P08839	ptsI	Phosphoenolpyruvate-protein phosphotransferase	682075	786896	1.50813e+06	1.23152e+06	1490490	1.28469e+06	4.13002e+06	740032	1.57049e+06	2.4689e+06	2.21098e+06	1.68018e+06	2.69531e+06	1.89788e+06	1792318
sp|P08956|T1RK_ECOLI	P08956	hsdR	Type I restriction enzyme EcoKI endonuclease subunit	39448.3	39477.2	395756	111596	344036	74209.7	169187	6699.27	82126.6	500114	651853	313547	563226	150990	252866
sp|P08957|T1MK_ECOLI	P08957	hsdM	Type I restriction enzyme EcoKI methylase subunit	92955.4	159439	262125	318131	280989	315283	502821	95257.4	291217	298751	973711	265156	587090	322337	355745
sp|P08997|MASY_ECOLI	P08997	aceB	Malate synthase A	394968	424497	716017	678334	943770	757391	979412	110898	571533	2.1469e+06	2318345	1.6207e+06	1.09689e+06	1.10659e+06	760785
sp|P09030|EX3_ECOLI	P09030	xthA	Exodeoxyribonuclease III	37646.6	86054.4	305238	205724	406825	346782	348269	30626	215133	302026	326000	302774	504033	397084	404967
sp|P09147|GALE_ECOLI	P09147	galE	UDP-glucose 4-epimerase	72116.9	181174	510550	344356	579385	481039	1.08069e+06	56002.4	483370	947035	1.03189e+06	619226	1075327	636898	679967
sp|P09148|GAL7_ECOLI	P09148	galT	Galactose-1-phosphate uridylyltransferase	192850	188976	309398	322347	299855	299729	480877	127354	308449	496497	452780	340535	353797	348714	318828
sp|P09158|SPEE_ECOLI	P09158	speE	Polyamine aminopropyltransferase	6445.99	11681.6	33294.9	42754.4	56982.6	47775.1	109767	13481.4	35645.1	34005.4	50872.2	29999.1	380084	133682	160818
sp|P09169|OMPT_ECOLI	P09169	ompT	Protease 7	196639	196493	172256	281170	292186	260496	125951	8988.25	159610	304785	314386	300315	356728	278452	272950
sp|P09323|PTW3C_ECOLI	P09323	nagE	PTS system N-acetylglucosamine-specific EIICBA component	81881.9	97890.8	92005.3	101308	87207.5	76668.7	40693.3	14120	76252.1	139067	127423	65921.6	188125	122575	106665
sp|P09372|GRPE_ECOLI	P09372	grpE	Protein GrpE	372742	592043	1.07543e+06	776641	1.08799e+06	1.08694e+06	1363840	310732	895108	1.13073e+06	1.38387e+06	1.05804e+06	1.40613e+06	1.12881e+06	1.12733e+06
sp|P09373|PFLB_ECOLI	P09373	pflB	Formate acetyltransferase 1	829637	969925	1.37148e+06	1.28324e+06	1.24121e+06	1.02753e+06	1.58658e+06	253352	900725	2.18225e+06	2.44975e+06	1.22454e+06	4.17864e+06	2.11382e+06	2.06787e+06
sp|P09394|GLPQ_ECOLI	P09394	glpQ	Glycerophosphodiester phosphodiesterase, periplasmic	1.57904e+06	2033197	3946785	2914626	3702717	3718504	1.49572e+06	262251	2686216	3.33972e+06	4298485	3.61106e+06	5296018	3.30246e+06	3779335
sp|P09549|DEDD_ECOLI	P09549	dedD	Cell division protein DedD	18849.8	19380.8	58053.4	41781.2	99734.9	57160.3	48006.2	8496.35	28821.1	72017.7	111354	98936.5	107370	42490	110872
sp|P09551|ARGT_ECOLI	P09551	argT	Lysine/arginine/ornithine-binding periplasmic protein	180780	251566	393482	574198	620409	657849	226164	72417.2	285534	746286	951902	969034	399622	409478	395218
sp|P09831|GLTB_ECOLI	P09831	gltB	Glutamate synthase [NADPH] large chain	38448.3	59291.1	43481.6	130667	150523	120622	140232	6262.52	75534.9	305237	368408	112562	277756	168616	113925
sp|P09832|GLTD_ECOLI	P09832	gltD	Glutamate synthase [NADPH] small chain	104059	166655	376742	340152	470992	436442	349732	38989.9	297182	552096	690795	576625	399566	263043	392673
sp|P0A6A3|ACKA_ECOLI	P0A6A3	ackA	Acetate kinase	683520	1.02365e+06	2.2436e+06	1.33918e+06	1.85717e+06	1.78916e+06	3203187	551175	1.72118e+06	1.90363e+06	1.93144e+06	1.85607e+06	3115220	2.06654e+06	2.39259e+06
sp|P0A6A8|ACP_ECOLI	P0A6A8	acpP	Acyl carrier protein	1.01759e+06	1.42319e+06	1.72106e+06	904041	2.15627e+06	2.05003e+06	1.76651e+06	901428	1.7124e+06	1.44724e+06	1.97289e+06	2.23159e+06	2.43533e+06	2.24932e+06	2.13983e+06
sp|P0A6B4|ALR1_ECOLI	P0A6B4	alr	Alanine racemase, biosynthetic	38141.1	16048.1	88335.1	50027	107147	100597	168846	22958.5	87971.2	106287	99399	125423	165755	94914.9	85495.7
sp|P0A6B7|ISCS_ECOLI	P0A6B7	iscS	Cysteine desulfurase IscS	639410	994243	2226446	2297866	2406841	2285938	5.77803e+06	1.05609e+06	2.61798e+06	3.91051e+06	4.22384e+06	2.77173e+06	5152320	2.6897e+06	2.79974e+06
sp|P0A6C1|END4_ECOLI	P0A6C1	nfo	Endonuclease 4	68500	101405	252879	113904	228671	223187	401737	113846	220092	245261	277488	264415	255671	219088	235697
sp|P0A6D3|AROA_ECOLI	P0A6D3	aroA	3-phosphoshikimate 1-carboxyvinyltransferase	47534.3	72727.1	179174	151044	155109	95328	245135	19774.1	183566	215952	271842	195105	168760	96688.2	114486
sp|P0A6D7|AROK_ECOLI	P0A6D7	aroK	Shikimate kinase 1	530732	842357	1.51739e+06	1.20711e+06	1.58585e+06	1.49678e+06	2.18794e+06	642074	1.57273e+06	1611169	1.75117e+06	1.47267e+06	2337974	1.83577e+06	1836082
sp|P0A6F1|CARA_ECOLI	P0A6F1	carA	Carbamoyl-phosphate synthase small chain	361788	752932	763941	1.75225e+06	2.45447e+06	2.19983e+06	387581	66476.9	318411	140114	220848	149532	3.0068e+06	3.32386e+06	3.41607e+06
sp|P0A6F3|GLPK_ECOLI	P0A6F3	glpK	Glycerol kinase	4970764	7752092	12855959	11345167	11899377	11795728	9148749	1.67935e+06	7762087	13049288	16563262	13504333	14221429	10457044	10330778
sp|P0A6F5|CH60_ECOLI	P0A6F5	groEL	Chaperonin GroEL	11295475	13988813	24342590	18254526	23395730	22580032	24753230	8235868	18086766	19546916	26158148	21160916	25758356	21208532	22389992
sp|P0A6F9|CH10_ECOLI	P0A6F9	groES	Co-chaperonin GroES	2296960	2.92264e+06	5.4572e+06	4.58596e+06	6752748	5.6651e+06	5202603	1.91473e+06	4.13258e+06	5215247	7.14478e+06	5816001	6317478	6048371	6389722
sp|P0A6G3|PNCC_ECOLI	P0A6G3	pncC	Nicotinamide-nucleotide amidohydrolase PncC	29414.4	36859.8	120862	82433.8	126992	120309	75187.7	16325.1	91076.6	75917.9	83243.9	119176	96418.3	101736	125025
sp|P0A6H1|CLPX_ECOLI	P0A6H1	clpX	ATP-dependent Clp protease ATP-binding subunit ClpX	750807	919955	1.30572e+06	1.13097e+06	1.35924e+06	1.44922e+06	2.54459e+06	411536	1.27547e+06	1.90427e+06	1.80324e+06	1.33695e+06	2.25915e+06	1.42784e+06	1.48284e+06
sp|P0A6H5|HSLU_ECOLI	P0A6H5	hslU	ATP-dependent protease ATPase subunit HslU	871753	1.46989e+06	2.91732e+06	2.05699e+06	2615198	2.63307e+06	4.34094e+06	798370	2.59994e+06	3.00938e+06	3.20641e+06	3135885	3.0666e+06	2.97824e+06	3.03514e+06
sp|P0A6I0|KCY_ECOLI	P0A6I0	cmk	Cytidylate kinase	268264	360291	479560	512417	621045	606027	711399	252308	615752	451213	470852	464531	872580	781600	724263
sp|P0A6I6|COAD_ECOLI	P0A6I6	coaD	Phosphopantetheine adenylyltransferase	9481.23	16429.6	56010.5	33284.4	55331.8	33597.1	145616	16108.9	33882.1	76245.1	117629	47873	157733	86590.5	94508.7
sp|P0A6J5|DADA_ECOLI	P0A6J5	dadA	D-amino acid dehydrogenase	147353	187445	304851	399066	562101	449184	416373	44753.6	238859	1.01078e+06	1.03086e+06	627531	476001	341389	309441
sp|P0A6J8|DDLA_ECOLI	P0A6J8	ddlA	D-alanine--D-alanine ligase A	83434.6	161572	282739	221320	336168	277245	729524	53219.6	275277	435307	501218	320354	616535	345148	406976
sp|P0A6K1|DAPF_ECOLI	P0A6K1	dapF	Diaminopimelate epimerase	28277.7	35808.7	31078.5	19234.2	21083.5	50984.2	150612	29210.3	44376.1	115815	110764	21215.9	101516	23223.4	76104.9
sp|P0A6K3|DEF_ECOLI	P0A6K3	def	Peptide deformylase	189722	465171	1012907	790909	1.17237e+06	1.06621e+06	1.78207e+06	295235	894999	1.20683e+06	1.16681e+06	1092917	1320242	1338677	1.20268e+06
sp|P0A6K6|DEOB_ECOLI	P0A6K6	deoB	Phosphopentomutase	862228	1.14768e+06	2.15976e+06	1711807	2140579	2.08449e+06	4.16803e+06	962646	1.86375e+06	3.7196e+06	3322551	2.86626e+06	2946815	2.50112e+06	2.24928e+06
sp|P0A6L0|DEOC_ECOLI	P0A6L0	deoC	Deoxyribose-phosphate aldolase	402996	639403	1.07564e+06	834022	1.10188e+06	1.03121e+06	1475907	362507	1.03625e+06	1.46843e+06	1.54968e+06	1.51839e+06	1.63115e+06	1.19481e+06	1147028
sp|P0A6L2|DAPA_ECOLI	P0A6L2	dapA	4-hydroxy-tetrahydrodipicolinate synthase	1366796	2152294	2.66015e+06	2235905	2.29248e+06	2.33303e+06	2530838	775471	1.72758e+06	2.44154e+06	2.73771e+06	2664809	3.1092e+06	2.1874e+06	2457070
sp|P0A6L4|NANA_ECOLI	P0A6L4	nanA	N-acetylneuraminate lyase	771536	1.07646e+06	1.58578e+06	1.72815e+06	1.78032e+06	1.5229e+06	2016360	187056	1.27083e+06	3.4948e+06	3.76261e+06	2.48477e+06	3.30064e+06	1.67708e+06	1.60141e+06
sp|P0A6L9|HSCB_ECOLI	P0A6L9	hscB	Co-chaperone protein HscB	72366.2	96326.9	161674	114924	167158	143969	207397	49667.7	169665	178469	184708	185108	246372	166796	187808
sp|P0A6M8|EFG_ECOLI	P0A6M8	fusA	Elongation factor G	3.76313e+06	6.72474e+06	13198975	9858806	14287559	12671802	24950040	4.92702e+06	12135455	15743164	18395032	12579599	28830072	15739612	16803028
sp|P0A6N4|EFP_ECOLI	P0A6N4	efp	Elongation factor P	491672	709981	1.75562e+06	1.32598e+06	2.11874e+06	2.02488e+06	2.16154e+06	351906	1.4884e+06	1.73707e+06	1.95919e+06	1.51258e+06	2.53189e+06	2.55661e+06	2.78125e+06
sp|P0A6N8|EFPL_ECOLI	P0A6N8	yeiP	Elongation factor P-like protein	151785	258454	463773	335887	486602	460022	510906	39416.7	502057	415659	454755	405819	670185	563961	560852
sp|P0A6P1|EFTS_ECOLI	P0A6P1	tsf	Elongation factor Ts	4.28655e+06	5692961	9598988	8390585	10303472	9280083	12075451	3.91508e+06	8821939	10237494	11342925	9374274	15051359	11585997	12324957
sp|P0A6P5|DER_ECOLI	P0A6P5	der	GTPase Der	217441	130292	246636	152565	256068	224745	379008	137785	222805	215542	216250	347126	266833	296557	259066
sp|P0A6P7|ENGB_ECOLI	P0A6P7	engB	Probable GTP-binding protein EngB	52479.1	79987.1	280944	168743	310039	328440	537694	54733.3	188990	252010	348380	150301	594079	347385	303681
sp|P0A6P9|ENO_ECOLI	P0A6P9	eno	Enolase	2.54984e+06	4697676	10031555	5310913	7090361	7095526	11030108	2.5368e+06	7215544	8111833	9299078	8121604	13260737	8754381	9425247
sp|P0A6Q3|FABA_ECOLI	P0A6Q3	fabA	3-hydroxydecanoyl-[acyl-carrier-protein] dehydratase	1.83554e+06	2.53935e+06	4.57602e+06	2694345	3642386	3.68199e+06	3.30651e+06	1.05426e+06	3621896	2.46881e+06	2.52415e+06	2.97553e+06	3.56377e+06	3.7442e+06	3793924
sp|P0A6Q6|FABZ_ECOLI	P0A6Q6	fabZ	3-hydroxyacyl-[acyl-carrier-protein] dehydratase FabZ	371262	688987	1.54846e+06	1.01096e+06	1457166	1.41804e+06	2.23494e+06	407953	1.31248e+06	1.53326e+06	1.24917e+06	1.36826e+06	1.4579e+06	1390138	1.60868e+06
sp|P0A6R0|FABH_ECOLI	P0A6R0	fabH	Beta-ketoacyl-[acyl-carrier-protein] synthase III	207867	260270	452776	395719	527204	429706	1.12112e+06	205621	493404	629769	622102	456123	1.0044e+06	637880	664705
sp|P0A6S0|FLGH_ECOLI	P0A6S0	flgH	Flagellar L-ring protein	161060	154013	186789	184879	215105	208540	135635	29239	143175	276734	275417	243958	279652	183971	190744
sp|P0A6S3|FLGI_ECOLI	P0A6S3	flgI	Flagellar P-ring protein	44990.4	61972.4	93380.1	70213.3	93506.6	83379	45356.6	8791.92	101837	180760	95794.9	94284.7	152714	84562.1	89311.3
sp|P0A6S7|GPDA_ECOLI	P0A6S7	gpsA	Glycerol-3-phosphate dehydrogenase [NAD(P)+]	68777.3	104792	268485	156247	256036	238464	403816	39615.8	184945	282916	359345	232808	470336	260737	253527
sp|P0A6T1|G6PI_ECOLI	P0A6T1	pgi	Glucose-6-phosphate isomerase	370976	723894	1.65946e+06	1.20532e+06	1.31493e+06	1.33839e+06	2503119	484864	1.25755e+06	2.24321e+06	2.635e+06	1.83755e+06	2.34291e+06	1.73026e+06	1500480
sp|P0A6T3|GAL1_ECOLI	P0A6T3	galK	Galactokinase	134047	155825	212193	204507	358174	267011	543201	38261.8	565691	506882	435363	381033	665573	311589	295991
sp|P0A6T5|GCH1_ECOLI	P0A6T5	folE	GTP cyclohydrolase 1	78122.9	196392	350425	508671	1253916	1.18748e+06	455132	413676	319541	595426	679688	1.20417e+06	735266	1.1537e+06	1.10662e+06
sp|P0A6T9|GCSH_ECOLI	P0A6T9	gcvH	Glycine cleavage system H protein	159726	139197	242899	144736	190082	219685	64432.6	21354.6	197651	131138	126064	188135	93318.4	111189	130956
sp|P0A6U3|MNMG_ECOLI	P0A6U3	mnmG	tRNA uridine 5-carboxymethylaminomethyl modification enzyme MnmG	43770.6	84269.3	24956.7	103456	235507	132114	415653	120008	106359	166488	94587	63700.4	239636	260600	249389
sp|P0A6V8|GLK_ECOLI	P0A6V8	glk	Glucokinase	24623.1	48800.2	97166.4	100721	282110	246049	234590	15368	158747	389900	447215	102971	204343	241067	94936.8
sp|P0A6W5|GREA_ECOLI	P0A6W5	greA	Transcription elongation factor GreA	815157	1.07422e+06	1.84751e+06	1.43978e+06	1.92522e+06	1.74087e+06	1.7723e+06	602578	1956130	2.00003e+06	2.01883e+06	1.94541e+06	2587762	2240829	2100236
sp|P0A6W9|GSH1_ECOLI	P0A6W9	gshA	Glutamate--cysteine ligase	118043	148102	133053	254960	258505	260137	356387	63654	159520	197221	134496	139013	517171	252531	224254
sp|P0A6X7|IHFA_ECOLI	P0A6X7	ihfA	Integration host factor subunit alpha	1.00371e+06	1.18954e+06	2.00108e+06	1.62886e+06	1.8939e+06	2.14116e+06	1.0549e+06	401266	1.51976e+06	1.4706e+06	1.21729e+06	2.2403e+06	1.12804e+06	1.69717e+06	1.82826e+06
sp|P0A6Y1|IHFB_ECOLI	P0A6Y1	ihfB	Integration host factor subunit beta	45135.6	134243	349926	342346	527518	392629	387035	34134.3	258652	678863	684166	618890	536842	533608	520931
sp|P0A6Y5|HSLO_ECOLI	P0A6Y5	hslO	33 kDa chaperonin	91878.4	80731.2	144976	131184	152732	144739	350144	71815.7	146976	188088	249688	148215	323070	166245	186865
sp|P0A6Y8|DNAK_ECOLI	P0A6Y8	dnaK	Chaperone protein DnaK	3.49672e+06	5.52109e+06	13341738	9029907	13416825	12946692	16929654	3.13967e+06	9062785	13486606	19101112	12975191	17002110	12896148	13278649
sp|P0A6Z1|HSCA_ECOLI	P0A6Z1	hscA	Chaperone protein HscA	145638	166897	348570	273829	380231	302132	833078	73467.4	358713	658609	481919	418449	738356	484758	441706
sp|P0A6Z3|HTPG_ECOLI	P0A6Z3	htpG	Chaperone protein HtpG	754409	1.06508e+06	1.46431e+06	1.78917e+06	2.08909e+06	1.73093e+06	4205431	781221	1.70324e+06	2.78536e+06	3.68992e+06	1776762	3.86222e+06	2.87457e+06	2.35647e+06
sp|P0A705|IF2_ECOLI	P0A705	infB	Translation initiation factor IF-2	895632	1.1044e+06	2091418	1.91002e+06	2.34845e+06	2.12071e+06	3.06684e+06	759846	1.94123e+06	2206576	2346595	2.10279e+06	3.23236e+06	2.25716e+06	2.42789e+06
sp|P0A707|IF3_ECOLI	P0A707	infC	Translation initiation factor IF-3	455244	701273	1109464	979458	1.44133e+06	1.18704e+06	1840455	346727	914593	1.41858e+06	1.50951e+06	951645	2.94517e+06	1.76257e+06	1.77775e+06
sp|P0A715|KDSA_ECOLI	P0A715	kdsA	2-dehydro-3-deoxyphosphooctonate aldolase	357135	336251	552412	448585	592705	558333	820430	176424	330954	886405	885023	586809	975720	621859	729470
sp|P0A717|KPRS_ECOLI	P0A717	prs	Ribose-phosphate pyrophosphokinase	955066	1315861	2.13996e+06	2242935	2.79041e+06	2.54627e+06	2.98572e+06	618743	1.80294e+06	1.83793e+06	1.85989e+06	1.51957e+06	4557489	3.10156e+06	3362485
sp|P0A729|NTPPB_ECOLI	P0A729	yceF	7-methyl-GTP pyrophosphatase	61730.6	76784.8	198866	106276	161080	149303	98018.2	22537.6	114648	132218	149367	190783	175281	143677	146802
sp|P0A731|MGSA_ECOLI	P0A731	mgsA	Methylglyoxal synthase	84960.5	94317.2	164306	99164.7	120889	136475	74538.2	33382.5	128580	63536.1	63099.4	129661	72853.3	113708	112475
sp|P0A734|MINE_ECOLI	P0A734	minE	Cell division topological specificity factor	24119.1	113108	276216	165983	309245	264370	284068	28863.8	226943	322817	403863	188251	398040	293669	307372
sp|P0A738|MOAC_ECOLI	P0A738	moaC	Cyclic pyranopterin monophosphate synthase	17842.3	26447.8	90712.6	43761.1	94140.8	81933.6	159545	23059.4	64214.4	120105	155993	124176	156359	85191.4	103663
sp|P0A744|MSRA_ECOLI	P0A744	msrA	Peptide methionine sulfoxide reductase MsrA	63727.6	55295.6	125910	61610	107794	111398	150169	38866.2	105588	227466	253356	200705	169714	113504	100200
sp|P0A746|MSRB_ECOLI	P0A746	msrB	Peptide methionine sulfoxide reductase MsrB	196626	236841	440028	498005	842344	786738	397819	66092.7	311217	512733	628336	545434	811055	619238	588300
sp|P0A749|MURA_ECOLI	P0A749	murA	UDP-N-acetylglucosamine 1-carboxyvinyltransferase	140299	177641	237047	303401	366532	310827	663919	116921	333169	443013	460523	299780	695551	462843	444430
sp|P0A752|NADD_ECOLI	P0A752	nadD	Nicotinate-nucleotide adenylyltransferase	21717.3	21066.9	33891.9	28405.5	34398.8	34733.9	40938.7	7834.72	34248.2	40180.6	37652.1	43883.5	36312.8	30426.9	31161.3
sp|P0A759|NAGB_ECOLI	P0A759	nagB	Glucosamine-6-phosphate deaminase	351974	407957	461376	523689	605334	510218	544482	103939	435520	996470	775982	617613	710201	504461	505534
sp|P0A761|NANE_ECOLI	P0A761	nanE	Putative N-acetylmannosamine-6-phosphate 2-epimerase	380830	391917	536455	521469	639204	510815	564823	80715.1	776580	1.20444e+06	1.18294e+06	1.03472e+06	903163	752754	616518
sp|P0A763|NDK_ECOLI	P0A763	ndk	Nucleoside diphosphate kinase	557753	848356	1.66382e+06	2.00486e+06	2672974	2.32822e+06	1.50782e+06	339101	1.78705e+06	1.66587e+06	2381045	1.44505e+06	3409219	2162230	2.01207e+06
sp|P0A780|NUSB_ECOLI	P0A780	nusB	Transcription antitermination protein NusB	252868	347340	616505	333773	409514	554605	768690	184253	629302	364147	532120	450962	492738	484292	457683
sp|P0A784|ORN_ECOLI	P0A784	orn	Oligoribonuclease	69068.4	124020	240658	206346	250909	249867	377817	98692.6	280451	286990	331914	316323	282134	315522	289499
sp|P0A786|PYRB_ECOLI	P0A786	pyrB	Aspartate carbamoyltransferase catalytic subunit	516765	1.7404e+06	1.53002e+06	4.28468e+06	5029611	4977025	899046	249485	291434	228623	409854	375423	5.21682e+06	5.36038e+06	4528436
sp|P0A794|PDXJ_ECOLI	P0A794	pdxJ	Pyridoxine 5'-phosphate synthase	159722	206620	480657	273010	479867	414029	520633	100768	300243	445726	561222	450265	585784	347864	446721
sp|P0A796|PFKA_ECOLI	P0A796	pfkA	ATP-dependent 6-phosphofructokinase isozyme 1	117996	125966	179053	187975	162554	228034	477512	94771.1	204358	296920	297962	180458	400961	262701	255994
sp|P0A799|PGK_ECOLI	P0A799	pgk	Phosphoglycerate kinase	5753257	8950838	15561661	10319938	12986951	12992136	12797508	3.75084e+06	11083893	12680061	14136494	14050816	12196940	11001148	11832047
sp|P0A7A2|GPMB_ECOLI	P0A7A2	gpmB	Probable phosphoglycerate mutase GpmB	50687.1	60461.8	55203.4	72966	87903.2	81357.8	131519	12980.2	133504	95259.9	103650	87003.2	163052	96202.9	83551.6
sp|P0A7A9|IPYR_ECOLI	P0A7A9	ppa	Inorganic pyrophosphatase	1.29857e+06	1.38205e+06	2.8111e+06	1940443	2.51086e+06	2.53629e+06	2.8383e+06	1.02149e+06	2.1946e+06	2.52441e+06	2666976	2.63639e+06	2.92335e+06	2.57454e+06	2.87045e+06
sp|P0A7B8|HSLV_ECOLI	P0A7B8	hslV	ATP-dependent protease subunit HslV	210120	229421	384999	251985	355125	334715	429159	148564	341249	302576	391814	387878	284510	337923	327092
sp|P0A7C2|LEXA_ECOLI	P0A7C2	lexA	LexA repressor	58034.4	105219	248934	173990	897524	824204	239555	36767.5	512507	671718	918932	722884	368070	263064	719790
sp|P0A7C6|PEPE_ECOLI	P0A7C6	pepE	Peptidase E	31435.8	97260.9	232630	184512	243512	222766	147697	16013.1	121597	236864	333996	225588	314374	229103	237544
sp|P0A7D1|PTH_ECOLI	P0A7D1	pth	Peptidyl-tRNA hydrolase	208052	410255	585128	532874	826961	643020	540489	244586	480142	631260	500311	498612	566318	716200	685500
sp|P0A7D4|PURA_ECOLI	P0A7D4	purA	Adenylosuccinate synthetase	831637	885442	1.19904e+06	1.17852e+06	1.17986e+06	1.20069e+06	3.71654e+06	580049	1.19104e+06	2131407	1.79019e+06	1.341e+06	2.67273e+06	1.60724e+06	1.51936e+06
sp|P0A7D7|PUR7_ECOLI	P0A7D7	purC	Phosphoribosylaminoimidazole-succinocarboxamide synthase	214165	249085	376212	327854	371259	376907	392118	118932	320723	297907	329502	294138	584650	409636	388706
sp|P0A7E1|PYRD_ECOLI	P0A7E1	pyrD	Dihydroorotate dehydrogenase (quinone)	41308	147987	145813	184767	307519	293462	134392	44290.5	82121.8	53929.4	114511	87960.8	820256	481830	372280
sp|P0A7E5|PYRG_ECOLI	P0A7E5	pyrG	CTP synthase	704046	776753	1045669	1.14971e+06	1.31426e+06	1.21314e+06	2.77114e+06	620233	1.02413e+06	1.62429e+06	1.59189e+06	974492	3.03688e+06	1.77619e+06	1.8524e+06
sp|P0A7E9|PYRH_ECOLI	P0A7E9	pyrH	Uridylate kinase	77080.2	251494	426472	409298	466797	490584	651374	138571	255584	277673	410731	353516	1.27205e+06	542159	534751
sp|P0A7F3|PYRI_ECOLI	P0A7F3	pyrI	Aspartate carbamoyltransferase regulatory chain	774160	860843	1028526	3642254	4.6719e+06	4626240	535830	114328	209277	117741	346427	211827	4484619	4.555e+06	4265829
sp|P0A7F6|SPED_ECOLI	P0A7F6	speD	S-adenosylmethionine decarboxylase proenzyme	13159.5	76844.5	128000	121785	147160	185780	302634	46246.6	93348.9	91088.9	60809.6	55312.3	419210	185671	222310
sp|P0A7G2|RBFA_ECOLI	P0A7G2	rbfA	30S ribosome-binding factor	570973	641712	1.08037e+06	799810	997475	952089	977285	426222	928432	839852	855137	1.00245e+06	1.00356e+06	1.05911e+06	1.04483e+06
sp|P0A7G6|RECA_ECOLI	P0A7G6	recA	Protein RecA	248111	320243	374928	496957	513603	464201	1.09618e+06	240615	477442	636282	590702	398574	1.09394e+06	669648	628372
sp|P0A7I0|RF1_ECOLI	P0A7I0	prfA	Peptide chain release factor RF1	32714.5	31038.9	60303.5	13310.5	53908.7	32148.1	130712	7667.22	56757.7	46540.9	61363.9	73787.3	107760	50971.1	88503.5
sp|P0A7I4|RF3_ECOLI	P0A7I4	prfC	Peptide chain release factor RF3	119737	142479	128953	209424	187406	169246	625564	79205.5	234875	314067	243406	178617	447851	309169	341267
sp|P0A7I7|RIBA_ECOLI	P0A7I7	ribA	GTP cyclohydrolase-2	15985.5	36359.2	112598	78819.9	118590	99560	186635	23587	70632.6	88224.5	128686	78436	253671	129005	120424
sp|P0A7J0|RIBB_ECOLI	P0A7J0	ribB	3,4-dihydroxy-2-butanone 4-phosphate synthase	371111	371971	714708	503040	617497	639541	797846	149638	774916	576724	622414	492606	741516	810258	823115
sp|P0A7J3|RL10_ECOLI	P0A7J3	rplJ	50S ribosomal protein L10	6080405	8.04002e+06	12138139	10382197	11481561	11354798	17290950	5.81869e+06	11587657	12540448	12783930	12157888	15519458	11810206	12796191
sp|P0A7J7|RL11_ECOLI	P0A7J7	rplK	50S ribosomal protein L11	3.54212e+06	3907114	5799101	4.45175e+06	5.82569e+06	5.48964e+06	6163305	2.18701e+06	5836322	5.05316e+06	4.97837e+06	5.43733e+06	5626927	5.38459e+06	6059230
sp|P0A7K2|RL7_ECOLI	P0A7K2	rplL	50S ribosomal protein L7/L12	3.98717e+06	5818849	7.82539e+06	6426663	7.49298e+06	7.31342e+06	10609591	6323050	7.32523e+06	8467093	9620684	7.55388e+06	11636468	8402720	8.22861e+06
sp|P0A7K6|RL19_ECOLI	P0A7K6	rplS	50S ribosomal protein L19	361789	615147	1.18357e+06	918010	1.39882e+06	1.09662e+06	2.43727e+06	316093	1.13866e+06	1.85334e+06	1.54625e+06	1121336	2.82342e+06	1.69518e+06	1.8636e+06
sp|P0A7L0|RL1_ECOLI	P0A7L0	rplA	50S ribosomal protein L1	7.59518e+06	8531154	15808543	11167228	14125344	13679044	19093858	5.37309e+06	14688308	14336326	14933842	13538230	20990040	13748703	15656455
sp|P0A7L3|RL20_ECOLI	P0A7L3	rplT	50S ribosomal protein L20	319375	456619	1.1888e+06	1194632	1.14163e+06	958234	1.94248e+06	377616	1.25113e+06	1.57941e+06	1.31903e+06	988368	2.13986e+06	1.72028e+06	1481747
sp|P0A7L8|RL27_ECOLI	P0A7L8	rpmA	50S ribosomal protein L27	71450.7	277013	414676	300574	487444	320637	1.14253e+06	190128	400170	805552	816545	288858	1.39456e+06	706405	675661
sp|P0A7M2|RL28_ECOLI	P0A7M2	rpmB	50S ribosomal protein L28	293930	873857	1267466	1016146	1.46677e+06	1.20284e+06	2.44843e+06	333500	1.46594e+06	1.86136e+06	1.66509e+06	1.18348e+06	2.36257e+06	1.80432e+06	1.78671e+06
sp|P0A7M6|RL29_ECOLI	P0A7M6	rpmC	50S ribosomal protein L29	135406	169205	568824	440902	1.84513e+06	1.12522e+06	2.02605e+06	65968.8	780161	1.74105e+06	1.97652e+06	1.56692e+06	1.88708e+06	1.73826e+06	1.94977e+06
sp|P0A7M9|RL31_ECOLI	P0A7M9	rpmE	50S ribosomal protein L31	692352	1.10862e+06	2.46824e+06	2.06631e+06	2.98498e+06	2.63662e+06	3057056	598993	2.41187e+06	2.81632e+06	2.85393e+06	3.08623e+06	3.33973e+06	3.01388e+06	3.33205e+06
sp|P0A7N4|RL32_ECOLI	P0A7N4	rpmF	50S ribosomal protein L32	41510.7	289885	608920	522068	656589	554247	883528	152380	623103	926591	944644	673548	1.00361e+06	789292	877324
sp|P0A7N9|RL33_ECOLI	P0A7N9	rpmG	50S ribosomal protein L33	233060	356150	587965	606427	806994	541338	1052703	128089	566790	855618	718815	617264	1254086	959579	902698
sp|P0A7R1|RL9_ECOLI	P0A7R1	rplI	50S ribosomal protein L9	5587434	7.48043e+06	12222581	8595341	12116160	11476830	14879990	4725286	12621364	11301602	11994639	11672832	13659007	13126151	13138052
sp|P0A7R5|RS10_ECOLI	P0A7R5	rpsJ	30S ribosomal protein S10	4255793	5.47912e+06	7140312	5.83458e+06	6837578	6637649	6808648	3.51026e+06	7.33309e+06	5960513	5.87303e+06	6.75317e+06	7.16926e+06	6.74896e+06	7.17627e+06
sp|P0A7R9|RS11_ECOLI	P0A7R9	rpsK	30S ribosomal protein S11	656228	763224	797255	864712	957436	715441	1.8564e+06	420331	999576	1.59533e+06	1.19858e+06	682132	2.05954e+06	1344353	1.26536e+06
sp|P0A7S3|RS12_ECOLI	P0A7S3	rpsL	30S ribosomal protein S12	33876.7	71045	76648.5	78364	123885	76236.2	324592	42350	122667	274136	200811	83513.6	494885	242787	205223
sp|P0A7S9|RS13_ECOLI	P0A7S9	rpsM	30S ribosomal protein S13	454807	905707	1.42229e+06	1.31533e+06	1.83647e+06	1.33264e+06	3186252	635100	1.66335e+06	2.25436e+06	1.81248e+06	1.25261e+06	3.70327e+06	2.38657e+06	2.38423e+06
sp|P0A7T3|RS16_ECOLI	P0A7T3	rpsP	30S ribosomal protein S16	702064	1.28371e+06	2.80329e+06	2.43963e+06	3.68645e+06	2877528	4.41134e+06	861338	2999477	4.46494e+06	4.38647e+06	3.34836e+06	5.53765e+06	4.22799e+06	4.0337e+06
sp|P0A7T7|RS18_ECOLI	P0A7T7	rpsR	30S ribosomal protein S18	2.06191e+06	2.94134e+06	4.95762e+06	3.47149e+06	4252644	4.07886e+06	4521729	1.39163e+06	4570550	3.69109e+06	3.60797e+06	4297774	4.8724e+06	4.58149e+06	4.28471e+06
sp|P0A7U3|RS19_ECOLI	P0A7U3	rpsS	30S ribosomal protein S19	43813	94049.4	268185	125478	359770	257145	543398	55813	248935	512684	755246	307271	367120	581234	572936
sp|P0A7U7|RS20_ECOLI	P0A7U7	rpsT	30S ribosomal protein S20	1115423	1252561	907408	919490	946853	732968	1.69969e+06	586005	1.02837e+06	1.44609e+06	1.24125e+06	819996	1.97617e+06	1.60905e+06	1.31974e+06
sp|P0A7V0|RS2_ECOLI	P0A7V0	rpsB	30S ribosomal protein S2	1.28898e+06	2622985	6.81632e+06	4353639	7.64747e+06	6.57575e+06	11445793	1.22119e+06	6.37969e+06	7324993	8.20191e+06	6.17393e+06	13235657	7636425	9407941
sp|P0A7V3|RS3_ECOLI	P0A7V3	rpsC	30S ribosomal protein S3	962219	884853	845546	622357	836556	616482	1.3759e+06	256153	551497	1.33719e+06	963867	637359	1.85117e+06	1.1303e+06	1.04988e+06
sp|P0A7V8|RS4_ECOLI	P0A7V8	rpsD	30S ribosomal protein S4	1048624	1168320	1.43278e+06	1.13287e+06	1.57978e+06	1.12684e+06	3.10333e+06	568306	1.45694e+06	1.9714e+06	1.65459e+06	1.05529e+06	4.12203e+06	2.06468e+06	2148785
sp|P0A7W1|RS5_ECOLI	P0A7W1	rpsE	30S ribosomal protein S5	4.09315e+06	5579254	9607280	7.95591e+06	10412125	9364427	12182015	2.93527e+06	9604636	10001514	9516198	9103001	12815972	10515793	10967821
sp|P0A7W7|RS8_ECOLI	P0A7W7	rpsH	30S ribosomal protein S8	1.98951e+06	3443905	6544216	4562237	6336615	6249911	7175497	1.85622e+06	5.88879e+06	5.91548e+06	6109399	5.63202e+06	8.02438e+06	6.97432e+06	6.75682e+06
sp|P0A7X3|RS9_ECOLI	P0A7X3	rpsI	30S ribosomal protein S9	864206	946835	1.015e+06	1.07509e+06	1.20876e+06	873486	2.65788e+06	442459	1.5153e+06	1.81993e+06	1265256	689860	2999641	2.04546e+06	1959796
sp|P0A7X6|RIMM_ECOLI	P0A7X6	rimM	Ribosome maturation factor RimM	219917	468802	982064	637636	912117	842654	1.15118e+06	211478	952250	1.01285e+06	888906	901738	1.26291e+06	1.06628e+06	1.04883e+06
sp|P0A7Y0|RNC_ECOLI	P0A7Y0	rnc	Ribonuclease 3	37699.5	43561	794508	46752.5	75140.8	89578	143958	21550.3	67067.2	64929.9	103319	103764	123035	94704.6	108634
sp|P0A7Z0|RPIA_ECOLI	P0A7Z0	rpiA	Ribose-5-phosphate isomerase A	1.02019e+06	1.38614e+06	2.35053e+06	1.55518e+06	2.37737e+06	2.09118e+06	1.94562e+06	557706	1626146	1.66091e+06	1.92583e+06	1.52616e+06	1.71261e+06	2395490	2.19307e+06
sp|P0A7Z4|RPOA_ECOLI	P0A7Z4	rpoA	DNA-directed RNA polymerase subunit alpha	1.27266e+06	1.70385e+06	3.41732e+06	2.36998e+06	3.36151e+06	3530926	4.34756e+06	1.28102e+06	3.43861e+06	3.42846e+06	3466758	3.37279e+06	3925390	3.63999e+06	3.97817e+06
sp|P0A800|RPOZ_ECOLI	P0A800	rpoZ	DNA-directed RNA polymerase subunit omega	84636.9	390084	1261210	532578	1.24282e+06	1.24643e+06	1.43684e+06	114245	904878	1.21985e+06	1.3182e+06	1.08658e+06	2.04053e+06	1.40922e+06	1.37486e+06
sp|P0A805|RRF_ECOLI	P0A805	frr	Ribosome-recycling factor	1844704	2.62115e+06	4.14318e+06	3.59348e+06	4068721	4.22233e+06	4510176	1.82306e+06	3986293	4.16149e+06	4.31672e+06	4.14045e+06	5.21326e+06	4.87242e+06	4.46831e+06
sp|P0A812|RUVB_ECOLI	P0A812	ruvB	Holliday junction branch migration complex subunit RuvB	29528.3	40294.1	55568.8	49035	60216.1	51050.9	73284.8	10912.6	53757.4	64219.7	71765.7	53213.9	69453.4	60981.8	67644.2
sp|P0A817|METK_ECOLI	P0A817	metK	S-adenosylmethionine synthase	401578	469089	809424	703968	903544	799840	1.48413e+06	235503	852701	1069576	1.03356e+06	787779	1508608	1.00383e+06	1.11174e+06
sp|P0A825|GLYA_ECOLI	P0A825	glyA	Serine hydroxymethyltransferase	513410	934578	1.7135e+06	1.15278e+06	1.82416e+06	2.24047e+06	1.88243e+06	276112	1.21894e+06	1.61956e+06	2.17139e+06	1.57306e+06	2.79517e+06	1668159	1.84825e+06
sp|P0A832|SSRP_ECOLI	P0A832	smpB	SsrA-binding protein	15063	16553.6	22761.9	19221.3	26158.4	24458.6	30507.6	11050.6	17119.5	27471.2	29022.1	25215	29080.4	27907.7	33803.3
sp|P0A836|SUCC_ECOLI	P0A836	sucC	Succinate--CoA ligase [ADP-forming] subunit beta	1.21721e+06	1.68761e+06	3.00176e+06	3.36676e+06	4.65654e+06	4357167	2.95632e+06	350393	2.05266e+06	3.49907e+06	3.72452e+06	2450133	4766782	3.15747e+06	3.12102e+06
sp|P0A840|SURE_ECOLI	P0A840	surE	5'/3'-nucleotidase SurE	35386.4	32932.1	87808	68059.8	93795.3	92436.2	103820	23956.2	45685.8	64338	74015.2	64352	112175	85353.2	101319
sp|P0A847|TGT_ECOLI	P0A847	tgt	Queuine tRNA-ribosyltransferase	14480.4	19181.8	92994	88910	126447	102804	419141	23846.3	103545	200674	249975	120530	416689	153166	168661
sp|P0A850|TIG_ECOLI	P0A850	tig	Trigger factor	7301446	9310698	16560792	13430491	15883424	16277660	22806700	6833924	15536079	14403581	15166586	13847633	22144440	16707368	17693054
sp|P0A853|TNAA_ECOLI	P0A853	tnaA	Tryptophanase	20090700	24000708	30577718	29318500	33207174	27997078	17160288	2511198	13872740	40877932	45956340	31298706	41254336	27121442	25522164
sp|P0A855|TOLB_ECOLI	P0A855	tolB	Tol-Pal system protein TolB	144809	177835	412664	320736	426959	426282	594131	96585.9	360841	458482	514498	543315	594651	349131	394591
sp|P0A858|TPIS_ECOLI	P0A858	tpiA	Triosephosphate isomerase	81430	239829	1.02491e+06	518097	1.11225e+06	949693	957993	103126	367097	1.1777e+06	1.94759e+06	1.27098e+06	1.63915e+06	998416	1.15787e+06
sp|P0A862|TPX_ECOLI	P0A862	tpx	Thiol peroxidase	1.65169e+06	2.57002e+06	5.48943e+06	3758662	5.98183e+06	5.62027e+06	5.48025e+06	887025	3750382	6.89451e+06	8630207	6333555	9404025	5682858	5.61856e+06
sp|P0A867|TALA_ECOLI	P0A867	talA	Transaldolase A	48301.2	68849.7	191848	123825	136396	96879.7	171680	48978.5	42675.3	374983	333504	394926	102056	67317.3	41686.1
sp|P0A870|TALB_ECOLI	P0A870	talB	Transaldolase B	1.64592e+06	2.06376e+06	3.29294e+06	3.08706e+06	4258783	3715318	6225153	1.2751e+06	3.82023e+06	5015275	5.12319e+06	4294852	6229387	4577838	4.55629e+06
sp|P0A877|TRPA_ECOLI	P0A877	trpA	Tryptophan synthase alpha chain	61480.9	76053.4	128229	101014	131087	121460	112717	17810.8	156132	181648	174603	122648	171870	122424	111871
sp|P0A879|TRPB_ECOLI	P0A879	trpB	Tryptophan synthase beta chain	40241.4	49987.2	113955	103104	129671	137430	158922	20435.1	74899.7	219250	264621	174486	142492	80013.4	89355.9
sp|P0A881|TRPR_ECOLI	P0A881	trpR	Trp operon repressor	25459.2	42020.8	117291	69153.9	113388	138593	100019	11904.6	84224.7	131396	124629	148501	115575	111552	113461
sp|P0A884|TYSY_ECOLI	P0A884	thyA	Thymidylate synthase	28291.2	42081.8	72196.7	74228.3	93588.6	70790.8	240062	7177.68	80936.1	153232	167453	77070.9	301069	140803	160258
sp|P0A887|UBIE_ECOLI	P0A887	ubiE	Ubiquinone/menaquinone biosynthesis C-methyltransferase UbiE	140834	142552	296492	284796	439709	312770	564847	88810.2	249895	394438	387447	283341	633192	350253	430339
sp|P0A890|TUSA_ECOLI	P0A890	tusA	Sulfur carrier protein TusA	35821.6	55638.1	102208	117510	157589	156118	384455	42740.1	89245.1	153640	213441	114260	509463	175194	159389
sp|P0A8A0|YEBC_ECOLI	P0A8A0	yebC	Probable transcriptional regulatory protein YebC	480321	524059	1016939	672061	814902	834729	720638	221008	908121	743052	813326	995251	1.08038e+06	838443	950119
sp|P0A8A2|YEEN_ECOLI	P0A8A2	yeeN	Probable transcriptional regulatory protein YeeN	228949	263904	576483	423515	541904	545482	612346	109855	542594	513632	556016	476844	716315	578051	603337
sp|P0A8B2|YFCN_ECOLI	P0A8B2	yfcN	UPF0115 protein YfcN	18274.5	27241.6	75000.6	54651	61451.2	67599.8	35987.9	13600.9	49766.8	70332.9	67202.5	74601.7	56364.1	71143	73529.8
sp|P0A8B5|YBAB_ECOLI	P0A8B5	ybaB	Nucleoid-associated protein YbaB	200258	446916	1.04427e+06	593364	723570	688597	810327	119691	619937	503393	722035	703458	1.00539e+06	744094	738506
sp|P0A8C1|YBJQ_ECOLI	P0A8C1	ybjQ	UPF0145 protein YbjQ	64540.2	65346.4	105949	119283	95839.2	154379	129420	37084.8	87371.5	162336	170159	163727	117854	110195	105961
sp|P0A8C4|YGFB_ECOLI	P0A8C4	ygfB	UPF0149 protein YgfB	42460	73967.8	160930	132770	155855	154835	171517	40185.3	144571	174251	211960	188864	196326	198943	168715
sp|P0A8D0|NRDR_ECOLI	P0A8D0	nrdR	Transcriptional repressor NrdR	41558.7	75367.2	157976	109128	171008	161651	212119	55331.7	113775	150243	158879	145313	150414	169191	182870
sp|P0A8D3|YAII_ECOLI	P0A8D3	yaiI	UPF0178 protein YaiI	32567	84459.3	165972	115775	146447	156215	150194	13821	116664	169270	162393	150738	147097	152294	124642
sp|P0A8D6|YMDB_ECOLI	P0A8D6	ymdB	O-acetyl-ADP-ribose deacetylase	28851.3	23961.4	32070.3	47098.1	48761.3	35233.7	40966.5	13511	38531.5	46127.3	38060.3	60001.9	64136.5	37977.3	49151.7
sp|P0A8E1|YCFP_ECOLI	P0A8E1	ycfP	UPF0227 protein YcfP	24196.9	53810.3	308151	135543	286799	290664	268360	21532.8	123686	418364	300306	356101	352677	218572	341435
sp|P0A8E7|YAJQ_ECOLI	P0A8E7	yajQ	UPF0234 protein YajQ	856692	1.23281e+06	2.59006e+06	1826291	2.96188e+06	2.78483e+06	2.57168e+06	623135	1.96623e+06	2.53953e+06	2.78232e+06	2.4787e+06	2.58386e+06	2.9077e+06	2730517
sp|P0A8F0|UPP_ECOLI	P0A8F0	upp	Uracil phosphoribosyltransferase	396088	910050	1.4993e+06	2.00168e+06	3.15391e+06	2.85609e+06	2.06962e+06	262916	1.00606e+06	1.34306e+06	1596747	963799	6859225	4.29398e+06	4.14615e+06
sp|P0A8F4|URK_ECOLI	P0A8F4	udk	Uridine kinase	94897.1	106458	157535	140808	192420	167960	452997	85093.4	143004	146045	147150	161325	303727	209984	214932
sp|P0A8G3|UXAC_ECOLI	P0A8G3	uxaC	Uronate isomerase	127644	167572	248626	236507	279367	256758	139982	12668.7	114104	237044	311412	187902	315660	206006	161539
sp|P0A8G6|NQOR_ECOLI	P0A8G6	wrbA	NAD(P)H dehydrogenase (quinone)	104455	96546	218313	164205	183434	173111	207154	51882.4	109437	653881	641690	627681	186298	134421	138100
sp|P0A8G9|EX7S_ECOLI	P0A8G9	xseB	Exodeoxyribonuclease 7 small subunit	103330	178660	373573	248349	376967	381607	340126	74078.2	277072	364129	347144	395608	381446	417103	369634
sp|P0A8H6|YIHI_ECOLI	P0A8H6	yihI	Der GTPase-activating protein YihI	195410	235389	311244	286389	364134	359852	441038	136637	312066	266272	335798	236090	502464	410082	363478
sp|P0A8H8|YACG_ECOLI	P0A8H8	yacG	DNA gyrase inhibitor YacG	38821.9	40764.9	132440	85027.4	147906	151315	168308	21013.4	109077	130615	180466	161883	189381	152368	176686
sp|P0A8I1|YQGF_ECOLI	P0A8I1	yqgF	Putative pre-16S rRNA nuclease	39973	44505.6	73311	68656.7	73651.8	86275.3	91621	7289.91	84304.3	80933.7	79456.1	59188.5	92761.4	69015.7	89061.3
sp|P0A8I3|YAAA_ECOLI	P0A8I3	yaaA	Peroxide stress resistance protein YaaA	46072.5	43318	56043.3	77519.4	67509.8	68724.6	121025	17919.3	57456.9	65519.4	80085.2	55080.1	133489	89333.3	61304.8
sp|P0A8I5|TRMB_ECOLI	P0A8I5	trmB	tRNA (guanine-N(7)-)-methyltransferase	91648.9	153848	323949	225266	323424	273909	507301	82787	304641	279280	352990	310710	386171	366964	336100
sp|P0A8J2|DNAT_ECOLI	P0A8J2	dnaT	Primosomal protein 1	20220.9	37607.7	69118.3	45226.3	56708.3	54198.5	75662.6	25356.5	58278.2	47992.4	52460.7	63447.3	82960.8	67097.3	68748.6
sp|P0A8J8|RHLB_ECOLI	P0A8J8	rhlB	ATP-dependent RNA helicase RhlB	52070.9	45588.9	81084.4	84950.9	144931	69913.9	352675	62884	69679.8	159349	224238	98500.8	418731	161190	150048
sp|P0A8K5|YAEP_ECOLI	P0A8K5	yaeP	UPF0253 protein YaeP	24237	65598.5	188484	70955.1	212638	202730	214276	18124.8	78573.3	245915	279289	213827	195408	203182	188414
sp|P0A8L1|SYS_ECOLI	P0A8L1	serS	Serine--tRNA ligase	399796	612018	980503	818840	1.20918e+06	917428	1.67778e+06	242860	943381	1.57285e+06	1587823	1.307e+06	1.9763e+06	1241153	1.3545e+06
sp|P0A8M0|SYN_ECOLI	P0A8M0	asnS	Asparagine--tRNA ligase	475155	556151	710261	852682	921330	732415	1221306	263411	849596	1.30246e+06	1.35656e+06	891796	1535167	1149461	1.0731e+06
sp|P0A8M3|SYT_ECOLI	P0A8M3	thrS	Threonine--tRNA ligase	189770	335254	336313	662974	642571	538879	767360	155777	431531	792460	774644	514925	1.42624e+06	847974	784021
sp|P0A8M6|YEEX_ECOLI	P0A8M6	yeeX	UPF0265 protein YeeX	23443	64731.4	306393	133227	326035	241169	521102	22543.2	136193	549101	747902	282728	1109479	331110	363010
sp|P0A8N3|SYK1_ECOLI	P0A8N3	lysS	Lysine--tRNA ligase	365831	441293	422729	770252	766195	567477	1.29548e+06	272894	490185	1.17334e+06	1248664	702071	1.90376e+06	942855	863005
sp|P0A8N5|SYK2_ECOLI	P0A8N5	lysU	Lysine--tRNA ligase, heat inducible	155525	214661	267437	441819	526477	358526	839813	178037	272338	644241	549798	429034	950785	586166	545525
sp|P0A8P3|FETP_ECOLI	P0A8P3	yggX	Probable Fe(2+)-trafficking protein	274425	479154	907925	840899	1.23221e+06	1.21966e+06	617344	73793.9	716767	948448	989905	1160156	1.09324e+06	1.29374e+06	1.17246e+06
sp|P0A8R0|RRAA_ECOLI	P0A8R0	rraA	Regulator of ribonuclease activity A	204870	242311	423385	356921	527101	425369	336754	107972	392517	421815	464646	625899	325590	402556	480130
sp|P0A8R4|SLYX_ECOLI	P0A8R4	slyX	Protein SlyX	65419.6	108518	171284	231802	318187	309578	162169	42708.1	121311	104746	109057	126368	338713	360720	302901
sp|P0A8S1|ARGP_ECOLI	P0A8S1	argP	HTH-type transcriptional regulator ArgP	48099.9	57240	119403	67878.5	76194.9	109106	99095.2	26841.2	72032.3	103327	111490	96518.3	45520.8	56026.4	77906.3
sp|P0A8T1|PRMA_ECOLI	P0A8T1	prmA	Ribosomal protein L11 methyltransferase	22418.1	60720.7	148358	61602.1	92207.7	78302.5	228050	24290.7	129980	161053	170988	136032	193895	137844	115841
sp|P0A8T7|RPOC_ECOLI	P0A8T7	rpoC	DNA-directed RNA polymerase subunit beta'	956316	1.33505e+06	2.08905e+06	2.6077e+06	2593067	2.17479e+06	5.93721e+06	837121	2.49977e+06	4.47536e+06	4.57275e+06	2.44019e+06	8161139	3.68228e+06	3.99076e+06
sp|P0A8V2|RPOB_ECOLI	P0A8V2	rpoB	DNA-directed RNA polymerase subunit beta	1945569	2.28052e+06	3.13189e+06	4.15896e+06	4.19843e+06	3.65404e+06	7264948	1.47673e+06	3.97245e+06	5.57697e+06	5669072	3.93726e+06	9068587	5183726	5160940
sp|P0A8W0|NANR_ECOLI	P0A8W0	nanR	HTH-type transcriptional repressor NanR	12250	11352.5	15736	7930.08	51647.7	38727.4	83166.1	5483.32	30039	35536.2	47945.8	12015.3	67829.5	35802.3	34450.5
sp|P0A8W2|SLYA_ECOLI	P0A8W2	slyA	Transcriptional regulator SlyA	112065	97441.7	179906	123658	192094	192469	162232	38394.8	110247	219575	367340	194791	178765	163223	147890
sp|P0A8W5|YQGE_ECOLI	P0A8W5	yqgE	UPF0301 protein YqgE	123083	54521.6	131508	84832	171634	156253	196781	29059.9	199719	290457	258917	164912	387035	176563	188856
sp|P0A8W8|YFBU_ECOLI	P0A8W8	yfbU	UPF0304 protein YfbU	345854	399737	830110	456709	704199	790269	688480	123943	518591	858382	913697	944815	610043	667536	655627
sp|P0A8X0|YJGA_ECOLI	P0A8X0	yjgA	UPF0307 protein YjgA	52426.8	52536.1	93606.3	31460.6	31302.5	77379.9	29005.9	31925.4	55411.6	28863.8	69238.7	83139.8	17593.3	28157.5	80263.1
sp|P0A8X2|YCEI_ECOLI	P0A8X2	yceI	Protein YceI	59589.2	73163.2	165613	149824	191851	210630	35864.3	4739.6	120124	208525	267422	218627	198025	178988	177977
sp|P0A8Y3|YIHX_ECOLI	P0A8Y3	yihX	Alpha-D-glucose 1-phosphate phosphatase YihX	50073.8	25218.5	114650	22394.6	85824.7	60159.5	86779.9	11608.7	104605	84243.1	130286	101994	120188	114343	55103.6
sp|P0A8Y5|YIDA_ECOLI	P0A8Y5	yidA	Sugar phosphatase YidA	24634.4	86192.1	140650	142109	179785	132634	488839	61487.8	127587	217766	250060	192364	409531	166175	197467
sp|P0A903|BAMC_ECOLI	P0A903	bamC	Outer membrane protein assembly factor BamC	94392.4	212464	583796	338784	494426	562178	602046	140463	350379	469141	553125	572330	404569	423574	381720
sp|P0A905|SLYB_ECOLI	P0A905	slyB	Outer membrane lipoprotein SlyB	31154.1	63745.6	184010	161502	296532	176869	302843	3978.95	107599	432284	453411	196545	287556	284484	224342
sp|P0A908|MIPA_ECOLI	P0A908	mipA	MltA-interacting protein	32910.3	40039.3	45770.3	89293.2	81444.7	87061.7	34836.1	12905.2	28266.8	67403.4	82481.2	52752.9	177741	87694.8	67523.5
sp|P0A910|OMPA_ECOLI	P0A910	ompA	Outer membrane protein A	1.13019e+06	1.2134e+06	1.94227e+06	2.31837e+06	2.52244e+06	2.25262e+06	2.77639e+06	855165	1.51022e+06	3038469	2.49009e+06	2463372	3249627	2.40448e+06	2.58949e+06
sp|P0A917|OMPX_ECOLI	P0A917	ompX	Outer membrane protein X	35707.6	38306.3	79059.5	98082.8	64889.4	51372	236034	44562.4	37683	89305.5	108176	137981	61403.5	126386	60733.5
sp|P0A940|BAMA_ECOLI	P0A940	bamA	Outer membrane protein assembly factor BamA	277254	341524	1.05356e+06	589790	867398	970917	856746	222083	650943	825658	823102	1.04034e+06	669444	715035	630515
sp|P0A948|RIMJ_ECOLI	P0A948	rimJ	[Ribosomal protein S5]-alanine N-acetyltransferase	26054.9	15025.1	61911.2	43526.9	31272.7	30816.5	43139.9	7614.53	38473.1	57992.1	72124.5	52522.4	64038	51421.5	52461.4
sp|P0A951|ATDA_ECOLI	P0A951	speG	Spermidine N(1)-acetyltransferase	36194.5	47767.8	57616	51311.9	69129.3	63128.4	84983.1	14072.1	65938.6	87245	55603.3	42329.3	142058	109606	94612.2
sp|P0A953|FABB_ECOLI	P0A953	fabB	3-oxoacyl-[acyl-carrier-protein] synthase 1	1.09821e+06	1078354	1.54558e+06	1.23679e+06	1.36082e+06	1.60606e+06	2358265	789740	1.32421e+06	1.31751e+06	1.55358e+06	1.47204e+06	2035752	1.5872e+06	1.93978e+06
sp|P0A955|ALKH_ECOLI	P0A955	eda	KHG/KDPG aldolase	950338	1.37799e+06	2.69193e+06	1.55157e+06	2.19316e+06	2.15763e+06	2.04346e+06	565551	1.89604e+06	1.70369e+06	1.80135e+06	2.38475e+06	2.58695e+06	2.07608e+06	1.93569e+06
sp|P0A964|CHEW_ECOLI	P0A964	cheW	Chemotaxis protein CheW	617928	999522	1.6325e+06	1.31613e+06	1618446	1.55619e+06	760843	186445	1.13422e+06	1.66656e+06	1.99899e+06	1.69757e+06	1.70661e+06	1.67138e+06	1.57898e+06
sp|P0A968|CSPD_ECOLI	P0A968	cspD	Cold shock-like protein CspD	101938	273771	583927	411337	562809	501314	652917	83846.8	426754	504131	467281	469158	581126	415854	509840
sp|P0A972|CSPE_ECOLI	P0A972	cspE	Cold shock-like protein CspE	4.63261e+06	4992640	6.02861e+06	5473629	5714663	6.08117e+06	5.12372e+06	2711003	6.44959e+06	5532039	4.8791e+06	6.45455e+06	5319646	5547777	6169865
sp|P0A988|DPO3B_ECOLI	P0A988	dnaN	Beta sliding clamp	46262.6	22669.1	79659.6	67307.1	124092	36801.9	325911	18243.1	86363.1	151368	158241	86003.3	266565	141809	143747
sp|P0A991|ALF1_ECOLI	P0A991	fbaB	Fructose-bisphosphate aldolase class 1	56681.3	73171.6	162913	131127	238134	198384	165878	9553.98	32651.7	533735	592735	411946	188834	116242	148424
sp|P0A993|F16PA_ECOLI	P0A993	fbp	Fructose-1,6-bisphosphatase class 1	73400.8	106071	173305	229924	321712	257014	551243	59031.3	242034	457541	364196	269282	914871	543883	497690
sp|P0A996|GLPC_ECOLI	P0A996	glpC	Anaerobic glycerol-3-phosphate dehydrogenase subunit C	105053	204433	472327	242864	444027	364530	276999	21844.9	299621	210159	379783	264386	672830	453850	437170
sp|P0A998|FTNA_ECOLI	P0A998	ftnA	Bacterial non-heme ferritin	63509.6	139446	591236	252845	351686	416034	255781	40910.4	265949	201604	314254	188640	855106	673850	699970
sp|P0A9A6|FTSZ_ECOLI	P0A9A6	ftsZ	Cell division protein FtsZ	914109	1.32752e+06	2.73054e+06	2.01849e+06	2757559	2.61655e+06	3.05547e+06	659951	2.00288e+06	3.28969e+06	3.96961e+06	2.92185e+06	3.74626e+06	2.75867e+06	2.77525e+06
sp|P0A9A9|FUR_ECOLI	P0A9A9	fur	Ferric uptake regulation protein	696437	915364	1.59119e+06	1.14551e+06	1.56309e+06	1.66186e+06	1.57473e+06	469802	1.2839e+06	1.38416e+06	1.48453e+06	1.6144e+06	1.48765e+06	1.43232e+06	1665898
sp|P0A9B2|G3P1_ECOLI	P0A9B2	gapA	Glyceraldehyde-3-phosphate dehydrogenase A	5.45923e+06	6.69916e+06	11972398	9322062	11845452	11536543	12977021	3.06414e+06	9352351	12274313	13897756	12502873	12867304	10220951	11302325
sp|P0A9B6|E4PD_ECOLI	P0A9B6	epd	D-erythrose-4-phosphate dehydrogenase	19774.5	19298.7	42613.4	54964.3	47535.6	50318.1	178819	42539.3	31180.5	94425.3	45805.9	51079.9	58415	41477.1	34087
sp|P0A9C0|GLPA_ECOLI	P0A9C0	glpA	Anaerobic glycerol-3-phosphate dehydrogenase subunit A	474849	538970	757367	793582	952343	840031	751024	71546.6	531484	1.07819e+06	1.03042e+06	715321	1.50805e+06	988553	989593
sp|P0A9C3|GALM_ECOLI	P0A9C3	galM	Aldose 1-epimerase	238057	272396	474432	424167	574350	518963	568551	103694	511614	649740	685508	582902	902171	613439	603209
sp|P0A9C5|GLN1B_ECOLI	P0A9C5	glnA	Glutamine synthetase	188567	298672	551053	1.94155e+06	2.7551e+06	2.28122e+06	1.73448e+06	174604	803286	844594	946843	610750	1.71569e+06	1572383	1.29046e+06
sp|P0A9C9|GLPX_ECOLI	P0A9C9	glpX	Fructose-1,6-bisphosphatase 1 class 2	118704	157887	273317	215254	286475	266904	506161	79099.8	253339	288563	289221	242240	442316	275590	325145
sp|P0A9D2|GSTA_ECOLI	P0A9D2	gstA	Glutathione S-transferase GstA	39634.6	42070.8	55070	111451	60672.9	105701	57920.9	15439.5	70260.9	67533.5	61304.5	50116.9	132786	80403.4	92770.1
sp|P0A9D8|DAPD_ECOLI	P0A9D8	dapD	2,3,4,5-tetrahydropyridine-2,6-dicarboxylate N-succinyltransferase	332483	413230	760835	711956	895883	775590	1.7896e+06	408595	842310	1.33783e+06	1.31724e+06	976950	1.38459e+06	949797	1.0832e+06
sp|P0A9E5|FNR_ECOLI	P0A9E5	fnr	Fumarate and nitrate reduction regulatory protein	90522.3	139780	267380	243399	259173	249918	197219	70643.8	233901	164520	170192	222712	473258	242997	315257
sp|P0A9F1|MNTR_ECOLI	P0A9F1	mntR	Transcriptional regulator MntR	45346.8	56450.8	125782	109876	129648	138232	93028.6	27577.5	107288	104535	91044.2	112391	114239	118877	119350
sp|P0A9G6|ACEA_ECOLI	P0A9G6	aceA	Isocitrate lyase	1.12021e+06	1.45486e+06	2.47402e+06	2.43924e+06	3.63846e+06	2.75711e+06	3202414	481741	1.20203e+06	6.92432e+06	9461682	5.05399e+06	4275782	3106446	2.76013e+06
sp|P0A9H1|MUG_ECOLI	P0A9H1	mug	G/U mismatch-specific DNA glycosylase	90137.5	77806.9	248389	121098	274054	319570	268878	55592.2	215890	317813	397462	273524	167838	324102	333235
sp|P0A9H7|CFA_ECOLI	P0A9H7	cfa	Cyclopropane-fatty-acyl-phospholipid synthase	19383.6	82111.3	149632	150633	246402	182222	102693	17095	58340.1	276834	288178	192302	327904	240590	220990
sp|P0A9H9|CHEZ_ECOLI	P0A9H9	cheZ	Protein phosphatase CheZ	112201	151231	327375	271971	354535	322482	226416	23656.1	193436	472228	607895	389841	510518	365243	372533
sp|P0A9J6|RBSK_ECOLI	P0A9J6	rbsK	Ribokinase	124861	161403	322740	196608	306312	267710	318590	65267	261172	272954	321333	278156	331853	282497	287705
sp|P0A9K3|PHOL_ECOLI	P0A9K3	ybeZ	PhoH-like protein	235069	290139	512322	540115	635751	626436	1.06932e+06	180452	418510	771836	817037	554951	958088	596456	632087
sp|P0A9K9|SLYD_ECOLI	P0A9K9	slyD	FKBP-type peptidyl-prolyl cis-trans isomerase SlyD	415370	927001	2.06034e+06	1385251	1.9773e+06	2.09332e+06	2.7826e+06	679247	1.61029e+06	1.72707e+06	1.69972e+06	1.705e+06	2.87784e+06	1.95886e+06	2.34738e+06
sp|P0A9L3|FKBB_ECOLI	P0A9L3	fklB	FKBP-type 22 kDa peptidyl-prolyl cis-trans isomerase	1.42848e+06	1.45505e+06	2.29106e+06	2.11937e+06	2376842	2554789	2.04593e+06	729397	1.88654e+06	1.78719e+06	1.86012e+06	1.934e+06	2642297	2.08388e+06	2407862
sp|P0A9L5|PPIC_ECOLI	P0A9L5	ppiC	Peptidyl-prolyl cis-trans isomerase C	195568	295403	572429	483959	652031	664948	794053	234800	506705	502890	481591	457892	686656	637680	658272
sp|P0A9L8|P5CR_ECOLI	P0A9L8	proC	Pyrroline-5-carboxylate reductase	117028	107245	224305	222536	268232	261544	284733	79558.2	171424	294035	311720	278517	277508	201623	225464
sp|P0A9M0|LON_ECOLI	P0A9M0	lon	Lon protease	323600	597407	1.49842e+06	1.30496e+06	1.6315e+06	1.55598e+06	2352496	385979	1.11648e+06	2032018	2.70998e+06	1.86063e+06	2.40965e+06	1.68402e+06	1.58176e+06
sp|P0A9M2|HPRT_ECOLI	P0A9M2	hpt	Hypoxanthine phosphoribosyltransferase	22319.5	97355.2	293415	206220	362859	293578	924386	101522	268618	482049	540364	312735	654588	359962	452974
sp|P0A9M5|XGPT_ECOLI	P0A9M5	gpt	Xanthine-guanine phosphoribosyltransferase	298989	350953	458254	390647	465013	524271	519024	175816	401022	305666	289572	360117	418034	252814	577168
sp|P0A9M8|PTA_ECOLI	P0A9M8	pta	Phosphate acetyltransferase	551443	581953	667262	912504	1.00824e+06	774490	1.91731e+06	253197	711709	1.35419e+06	1.3154e+06	675106	2.56487e+06	1.29538e+06	1.30998e+06
sp|P0A9N4|PFLA_ECOLI	P0A9N4	pflA	Pyruvate formate-lyase 1-activating enzyme	24425.9	41948	76045.4	75601.1	107683	74441.5	218495	19510.3	64881.3	185992	107107	97454.8	256016	137323	130779
sp|P0A9P0|DLDH_ECOLI	P0A9P0	lpdA	Dihydrolipoyl dehydrogenase	3.49748e+06	5.43632e+06	11207665	9747518	13913799	13600466	12913333	3.10831e+06	7.77781e+06	11125532	14270164	10582232	14490038	10635411	10312199
sp|P0A9P4|TRXB_ECOLI	P0A9P4	trxB	Thioredoxin reductase	794238	1.20737e+06	2.08864e+06	1.77446e+06	2647333	2.5626e+06	2.07504e+06	457118	1.73226e+06	1.39948e+06	1776652	1.81848e+06	2.73604e+06	2.43072e+06	2500695
sp|P0A9P6|DEAD_ECOLI	P0A9P6	deaD	ATP-dependent RNA helicase DeaD	139617	208263	334711	349283	465144	384633	1.55713e+06	275944	449017	458800	343778	271012	1.02761e+06	497157	626019
sp|P0A9Q1|ARCA_ECOLI	P0A9Q1	arcA	Aerobic respiration control protein ArcA	1086523	1.33731e+06	2.7606e+06	2.1948e+06	2.78004e+06	2831549	3.5773e+06	987585	2.58782e+06	2670582	3.10682e+06	3.07251e+06	2.43818e+06	2818627	3.01005e+06
sp|P0A9Q5|ACCD_ECOLI	P0A9Q5	accD	Acetyl-coenzyme A carboxylase carboxyl transferase subunit beta	309596	468442	832359	815915	936618	947749	1.44504e+06	292012	859009	931046	1150516	833510	1.36706e+06	1.04287e+06	1.06565e+06
sp|P0A9Q7|ADHE_ECOLI	P0A9Q7	adhE	Bifunctional aldehyde-alcohol dehydrogenase AdhE	468531	744855	1.56636e+06	991743	1.1379e+06	1.23601e+06	1.73113e+06	222031	968857	2.96694e+06	3.39177e+06	2.22137e+06	2615913	1.32861e+06	1.47183e+06
sp|P0A9Q9|DHAS_ECOLI	P0A9Q9	asd	Aspartate-semialdehyde dehydrogenase	161524	242978	450469	421144	445753	474236	714712	133415	357960	785037	888731	570561	775094	461175	446487
sp|P0A9R4|FER_ECOLI	P0A9R4	fdx	2Fe-2S ferredoxin	215894	376453	731914	484836	776361	816352	679927	206056	744736	755631	962106	876594	881672	744614	842563
sp|P0A9S3|GATD_ECOLI	P0A9S3	gatD	Galactitol 1-phosphate 5-dehydrogenase	130429	114793	197681	120415	127998	115837	129450	11709	112667	385205	378995	135109	48997.6	85136.8	89526.3
sp|P0A9T4|TAS_ECOLI	P0A9T4	tas	Protein tas	30523.5	37006.1	70752.4	93176.9	74742.9	76852.6	124627	20244.8	63668.3	94377.2	104796	157108	122575	45568.2	82020.2
sp|P0A9U3|YBIT_ECOLI	P0A9U3	ybiT	Probable ATP-binding protein YbiT	131779	164385	246456	247490	262607	191131	584806	126899	274278	344667	317900	210356	427143	372210	344701
sp|P0A9V1|LPTB_ECOLI	P0A9V1	lptB	Lipopolysaccharide export system ATP-binding protein LptB	37015.3	71849.4	175216	130661	205427	191738	261297	39681.5	158140	253780	228251	205008	219970	212501	226119
sp|P0A9W3|ETTA_ECOLI	P0A9W3	ettA	Energy-dependent translational throttle protein EttA	265887	418401	700716	783228	1.0528e+06	934227	1458719	195652	607057	999119	1.21191e+06	713631	2.21209e+06	1.07669e+06	1135992
sp|P0A9W6|IBAG_ECOLI	P0A9W6	ibaG	Acid stress protein IbaG	226308	221594	400210	272289	368394	398302	341300	113656	421326	275538	313642	371899	453697	396952	391909
sp|P0A9W9|YRDA_ECOLI	P0A9W9	yrdA	Protein YrdA	57755.3	49369.7	170768	150284	208347	196984	144929	7065.65	137942	94972.1	105225	74895.1	151430	144468	182769
sp|P0A9X4|MREB_ECOLI	P0A9X4	mreB	Cell shape-determining protein MreB	418311	580786	944514	896935	1.14675e+06	1.02933e+06	2.0078e+06	385989	893626	1.32473e+06	1.27541e+06	983119	1.87692e+06	1261155	1395054
sp|P0A9X9|CSPA_ECOLI	P0A9X9	cspA	Cold shock protein CspA	757576	841181	2.0311e+06	1.52857e+06	1.68911e+06	1.46033e+06	3.92404e+06	616105	1.91662e+06	2974775	2.02238e+06	2.44885e+06	2.42165e+06	2.05785e+06	1.99446e+06
sp|P0A9Y6|CSPC_ECOLI	P0A9Y6	cspC	Cold shock-like protein CspC	6306047	7.21569e+06	8413720	8024122	8134714	8086787	7085135	2187922	8192652	7772496	8.2189e+06	7.33537e+06	9551966	8.20699e+06	7.85924e+06
sp|P0A9Z1|GLNB_ECOLI	P0A9Z1	glnB	Nitrogen regulatory protein P-II 1	376085	574787	1.17437e+06	783086	1.26023e+06	1.24149e+06	747351	174185	813690	671564	715385	1.029e+06	868207	918417	1071774
sp|P0AA04|PTHP_ECOLI	P0AA04	ptsH	Phosphocarrier protein HPr	91739.6	205042	526453	350079	488749	404763	796268	139234	402663	728984	717110	550153	1.2235e+06	573160	556214
sp|P0AA10|RL13_ECOLI	P0AA10	rplM	50S ribosomal protein L13	2.29843e+06	2.61926e+06	3.99156e+06	3.49942e+06	4353016	4.00376e+06	5386799	2.04723e+06	4379571	4498116	4359748	3.99168e+06	6776282	4.63953e+06	4832510
sp|P0AA16|OMPR_ECOLI	P0AA16	ompR	DNA-binding dual transcriptional regulator OmpR	357323	380420	747183	557182	777070	755186	881553	216808	651425	699356	774740	736472	1.06349e+06	738232	841014
sp|P0AA25|THIO_ECOLI	P0AA25	trxA	Thioredoxin 1	1733278	2.22731e+06	4690799	3.46998e+06	4820516	4.43899e+06	5.97078e+06	1388066	3.46482e+06	4.96537e+06	5.00778e+06	4.67835e+06	5.22389e+06	5330210	4.04188e+06
sp|P0AA39|RLUC_ECOLI	P0AA39	rluC	Ribosomal large subunit pseudouridine synthase C	41693.5	39795.4	48566.7	66922.8	50915.3	52291	115279	19650.9	62100.5	73841.5	61096.4	40548.4	106074	67935.3	104535
sp|P0AA43|RSUA_ECOLI	P0AA43	rsuA	Ribosomal small subunit pseudouridine synthase A	67411.6	78612.2	169443	103697	164834	131896	308317	57446.2	134451	233784	295077	177427	360075	193490	174703
sp|P0AA95|YACC_ECOLI	P0AA95	yacC	Uncharacterized protein YacC	24621	34311.5	70047.2	49292.9	64304.1	60038.3	81115.2	18487.7	54014.4	79808.7	73969.5	69676.4	19802.9	66270.9	59267.6
sp|P0AAB4|UBID_ECOLI	P0AAB4	ubiD	3-octaprenyl-4-hydroxybenzoate carboxy-lyase	8874	44845.7	24336.7	118273	69758.3	33646.9	155412	15407.1	12921.4	136090	190529	64542.2	247184	122530	74531.6
sp|P0AAB6|GALF_ECOLI	P0AAB6	galF	UTP--glucose-1-phosphate uridylyltransferase	281290	466799	909896	797337	1128992	975856	1.85578e+06	255060	737903	1.33323e+06	1279027	961656	2.34705e+06	1.18325e+06	1.26681e+06
sp|P0AAC8|ISCA_ECOLI	P0AAC8	iscA	Iron-binding protein IscA	160515	162430	380570	262684	416478	380081	482853	89707.7	408120	486379	463490	489571	645284	418672	448757
sp|P0AAD6|SDAC_ECOLI	P0AAD6	sdaC	Serine transporter SdaC	15774.5	21866.3	46526.3	29199.1	40734.7	35443.3	21660.2	4554.38	29134	19478	19008.8	20695.8	43061.4	24518.6	42050.3
sp|P0AAF6|ARTP_ECOLI	P0AAF6	artP	Arginine transport ATP-binding protein ArtP	18407.1	28500.2	52231.8	34965.5	36302.3	25508.6	74358	17213.2	39321.5	68870.5	59087.3	47711.6	65969.5	19449.1	33741.8
sp|P0AAG8|MGLA_ECOLI	P0AAG8	mglA	Galactose/methyl galactoside import ATP-binding protein MglA	61007.1	66274.9	152450	236607	267785	165149	249381	4231.43	147457	365213	443806	221223	356636	179937	234827
sp|P0AAI3|FTSH_ECOLI	P0AAI3	ftsH	ATP-dependent zinc metalloprotease FtsH	102062	80433.5	141956	250504	278373	256743	429649	55859.8	245010	199629	204689	104299	191939	166193	226872
sp|P0AAI5|FABF_ECOLI	P0AAI5	fabF	3-oxoacyl-[acyl-carrier-protein] synthase 2	631376	729062	1.21442e+06	944221	1.1941e+06	1.28902e+06	1.77408e+06	566290	1.26902e+06	1.18311e+06	1.33952e+06	1.084e+06	2.28207e+06	1306189	1519319
sp|P0AAI9|FABD_ECOLI	P0AAI9	fabD	Malonyl CoA-acyl carrier protein transacylase	213954	329747	864258	518890	839242	778129	1.70907e+06	241317	778075	1.0008e+06	1.09051e+06	661920	1.94922e+06	995227	1.01641e+06
sp|P0AAJ5|FDOH_ECOLI	P0AAJ5	fdoH	Formate dehydrogenase-O iron-sulfur subunit	11621.2	19181.1	18438.5	28790.3	21655.9	20797.5	163636	24376.5	21984.8	23074.4	22378.8	20217.5	23853.3	16807	20166.3
sp|P0AAN3|HYPB_ECOLI	P0AAN3	hypB	Hydrogenase maturation factor HypB	22877.6	25141.3	40948.1	20539.8	47194.9	46107.4	31474.4	8818.97	22380.3	30987.1	41410.1	19408.4	87047.4	53323.2	55123.8
sp|P0AAQ2|YAJD_ECOLI	P0AAQ2	yajD	Putative HNH nuclease YajD	159973	190147	308436	207553	252336	288905	110113	47441.7	205050	149452	151895	246037	177758	223022	219152
sp|P0AAR3|YBAK_ECOLI	P0AAR3	ybaK	Cys-tRNA(Pro)/Cys-tRNA(Cys) deacylase YbaK	134062	189981	353143	225004	345629	327215	253454	109119	265845	264117	339488	362921	311292	274324	333288
sp|P0AAS7|YBCJ_ECOLI	P0AAS7	ybcJ	Putative RNA-binding protein YbcJ	72513.8	77671.8	175824	112636	174763	194605	193235	44228.5	146928	139650	120497	244559	231972	149186	196673
sp|P0AAT6|IOJAP_ECOLI	P0AAT6	rsfS	Ribosomal silencing factor RsfS	33016.5	112985	198726	176175	225989	215799	502951	148245	231378	275932	273308	207516	608868	383761	342497
sp|P0AAT9|YBEL_ECOLI	P0AAT9	ybeL	Uncharacterized protein YbeL	128680	158789	235940	145082	169319	191608	145965	84246.3	120690	209633	186070	296755	84345.2	159346	142677
sp|P0AAV6|YBGS_ECOLI	P0AAV6	ybgS	Uncharacterized protein YbgS	32163.2	46931.1	67647.6	68195.6	94050.6	84527.1	75067.3	11876.5	20687.4	75353.4	92458.6	115038	62576.4	56941.4	70080
sp|P0AAX8|YBIS_ECOLI	P0AAX8	ybiS	Probable L,D-transpeptidase YbiS	171067	187510	352414	185471	300754	324770	526976	141134	321602	456511	509325	389106	586505	336874	340813
sp|P0AAY6|YBJN_ECOLI	P0AAY6	ybjN	Uncharacterized protein YbjN	29161.8	56820.5	112991	78419.9	34087.9	50586.3	47828.7	25877.9	111884	37129.1	103699	108400	47429.7	104032	110650
sp|P0AAZ7|YCAR_ECOLI	P0AAZ7	ycaR	UPF0434 protein YcaR	429016	636787	1.32428e+06	909823	1230677	1.27773e+06	761619	290634	826472	934292	953473	1.26306e+06	1048536	1490993	1228234
sp|P0AB18|TUSE_ECOLI	P0AB18	tusE	Sulfurtransferase TusE	30059.1	33967.5	71297.7	37864.7	61671.3	54335.1	76459	22505.8	71742.5	42344.4	64556	59866.9	104732	67052.1	73267.6
sp|P0AB24|EFEO_ECOLI	P0AB24	efeO	Iron uptake system component EfeO	49484.4	95940.1	160565	275936	429028	352131	316005	60300	287262	596077	739886	569917	351550	222906	237367
sp|P0AB28|YCED_ECOLI	P0AB28	yceD	Large ribosomal RNA subunit accumulation protein YceD	105703	207551	539873	284207	553056	519432	547852	105557	469428	629733	580060	531588	539751	642870	664091
sp|P0AB43|YCGL_ECOLI	P0AB43	ycgL	Protein YcgL	33939.3	43710.5	88531.6	82877.8	132022	101428	131788	33548.1	90325.8	124449	140255	144569	129604	108914	116011
sp|P0AB52|YCHN_ECOLI	P0AB52	ychN	Protein YchN	147655	204872	463452	254821	396280	402094	236763	64272.5	272702	358749	460191	410153	345791	351088	376863
sp|P0AB55|YCII_ECOLI	P0AB55	yciI	Protein YciI	103396	127768	235137	211356	267850	254664	108132	57048.2	127462	279047	285321	385305	180163	217470	222438
sp|P0AB61|YCIN_ECOLI	P0AB61	yciN	Protein YciN	156010	265394	401305	441015	565460	489792	625544	157102	352654	427716	380050	469109	546168	595963	482716
sp|P0AB71|ALF_ECOLI	P0AB71	fbaA	Fructose-bisphosphate aldolase class 2	495744	793591	1.99086e+06	1536186	2.22055e+06	1.87595e+06	3.71377e+06	475441	1448801	3288412	3.73795e+06	2.19393e+06	3287566	2.0063e+06	2177754
sp|P0AB77|KBL_ECOLI	P0AB77	kbl	2-amino-3-ketobutyrate coenzyme A ligase	388151	442998	668318	737152	945995	943389	1.1913e+06	267414	584321	921661	965747	721752	1.12257e+06	860418	911592
sp|P0AB89|PUR8_ECOLI	P0AB89	purB	Adenylosuccinate lyase	248406	198751	166276	333245	382500	403017	575762	113891	311524	550719	406613	335424	716832	663480	464764
sp|P0AB91|AROG_ECOLI	P0AB91	aroG	Phospho-2-dehydro-3-deoxyheptonate aldolase, Phe-sensitive	83475.3	180699	483100	368291	654505	543461	1.00873e+06	69952.8	358268	1.02127e+06	1.03656e+06	681251	896886	605449	595353
sp|P0ABA0|ATPF_ECOLI	P0ABA0	atpF	ATP synthase subunit b	21720.1	50001.1	142064	89829.6	111605	65614.8	84402.3	29247.5	50132.8	79394.3	62231.9	49400.8	217439	101713	146958
sp|P0ABA4|ATPD_ECOLI	P0ABA4	atpH	ATP synthase subunit delta	477846	691384	1.68106e+06	1.13129e+06	1.54109e+06	1.60759e+06	1.57185e+06	249030	1.41396e+06	1.39738e+06	1.54645e+06	1.49572e+06	1.86072e+06	1.59219e+06	1.73634e+06
sp|P0ABA6|ATPG_ECOLI	P0ABA6	atpG	ATP synthase gamma chain	859138	982341	1.74226e+06	1.27671e+06	1.54648e+06	1.51182e+06	1.73389e+06	475463	1.48194e+06	1.43724e+06	1561764	1.44201e+06	2153994	1.48453e+06	1.7436e+06
sp|P0ABB0|ATPA_ECOLI	P0ABB0	atpA	ATP synthase subunit alpha	3.54648e+06	3.83142e+06	6.32874e+06	5.19003e+06	5.66577e+06	5.74143e+06	8953393	2.52522e+06	5.4505e+06	6.25736e+06	6671723	5516584	11050962	6.28617e+06	6.41032e+06
sp|P0ABB4|ATPB_ECOLI	P0ABB4	atpD	ATP synthase subunit beta	2.83954e+06	3144461	4.57239e+06	4.9585e+06	5600985	5300362	9652464	1.49662e+06	4269231	6434046	6.55234e+06	4877697	11019223	6.45285e+06	6514310
sp|P0ABC3|HFLC_ECOLI	P0ABC3	hflC	Modulator of FtsH protease HflC	10309.6	53716.8	212900	97093.8	158997	125199	121389	4391.08	67947.1	84936	105775	86610	158371	59114.4	104220
sp|P0ABC7|HFLK_ECOLI	P0ABC7	hflK	Modulator of FtsH protease HflK	130800	197209	467245	352202	445425	476380	419014	70971.6	273900	410611	476674	463086	456769	348031	385258
sp|P0ABD3|BFR_ECOLI	P0ABD3	bfr	Bacterioferritin	26895.1	46345.8	118806	101751	142816	155751	103355	25092.9	68518	180322	237440	156832	141008	110781	106051
sp|P0ABD5|ACCA_ECOLI	P0ABD5	accA	Acetyl-coenzyme A carboxylase carboxyl transferase subunit alpha	434400	656120	1.7885e+06	1152787	1.61269e+06	1.68162e+06	2.93462e+06	492621	1.51981e+06	1.9965e+06	2.31139e+06	1507568	3.05347e+06	1.93496e+06	1.99486e+06
sp|P0ABD8|BCCP_ECOLI	P0ABD8	accB	Biotin carboxyl carrier protein of acetyl-CoA carboxylase	754923	759927	1.49134e+06	821050	1.34981e+06	1.19355e+06	1358422	638641	1.30819e+06	1.0466e+06	1.16681e+06	1.08857e+06	1.26513e+06	1.20661e+06	1.3688e+06
sp|P0ABF6|CDD_ECOLI	P0ABF6	cdd	Cytidine deaminase	199159	303683	688846	351983	540106	526002	827324	142856	619545	966714	995248	839325	1.03718e+06	676643	676953
sp|P0ABH9|CLPA_ECOLI	P0ABH9	clpA	ATP-dependent Clp protease ATP-binding subunit ClpA	87891.6	101405	81233.2	336742	243094	326852	591250	58717.6	57348.4	524009	616188	263507	330324	341466	238618
sp|P0ABK5|CYSK_ECOLI	P0ABK5	cysK	Cysteine synthase A	2902560	4.28867e+06	8.27773e+06	5801218	8726157	8.29787e+06	3.7069e+06	839027	4508442	8603265	11690657	8.16901e+06	11806684	8127947	7.96684e+06
sp|P0ABP8|DEOD_ECOLI	P0ABP8	deoD	Purine nucleoside phosphorylase DeoD-type	1.14162e+06	1.646e+06	2.25934e+06	2.50634e+06	2.51498e+06	2.37754e+06	3.65005e+06	1.0465e+06	1.98777e+06	3509318	3.72003e+06	3138194	3974039	3.25996e+06	3159793
sp|P0ABQ0|COABC_ECOLI	P0ABQ0	coaBC	Coenzyme A biosynthesis bifunctional protein CoaBC	10061.6	11971.1	22294.8	31404.7	36347.2	24631.5	73158	11608.8	15471.9	85090.4	72009	27737.6	73898.7	52099.2	32910.5
sp|P0ABQ2|GARR_ECOLI	P0ABQ2	garR	2-hydroxy-3-oxopropionate reductase	701989	952899	1.82441e+06	1166440	1.5078e+06	1.39099e+06	745558	59350.1	1189798	4.65495e+06	4.47701e+06	3483087	2.24049e+06	1.4785e+06	1.72025e+06
sp|P0ABQ4|DYR_ECOLI	P0ABQ4	folA	Dihydrofolate reductase	166133	192092	288004	208245	288214	255249	358133	114835	319060	253361	257871	233012	378098	310853	262949
sp|P0ABR1|DINI_ECOLI	P0ABR1	dinI	DNA damage-inducible protein I	24684.9	32256.6	39260.9	47413.8	48413.7	42092.6	59266.9	17149.3	48366.9	54649.3	50613.8	38331.7	98287.2	68419.2	54564.7
sp|P0ABS1|DKSA_ECOLI	P0ABS1	dksA	RNA polymerase-binding transcription factor DksA	517535	901300	1.94545e+06	1.71575e+06	2.40799e+06	2.13058e+06	2.63708e+06	695196	1.93252e+06	2.18903e+06	2.28081e+06	1978356	3279347	2.57078e+06	2.71091e+06
sp|P0ABS8|HOLE_ECOLI	P0ABS8	holE	DNA polymerase III subunit theta	31996.4	41092.4	41478.1	50126.3	71650	43110.3	58429.5	14422.5	40360.5	50436.9	41235.3	47691.9	102939	65758.6	77030
sp|P0ABT2|DPS_ECOLI	P0ABT2	dps	DNA protection during starvation protein	334215	660125	2166906	1.37163e+06	1.94538e+06	1.86755e+06	536764	96567.3	552114	2.68067e+06	3.31762e+06	2.55852e+06	1342823	1.11002e+06	1.10468e+06
sp|P0ABU0|MENB_ECOLI	P0ABU0	menB	1,4-dihydroxy-2-naphthoyl-CoA synthase	181415	190207	301829	252937	265599	266654	456881	99273.8	279303	334159	312436	310117	468147	295324	269799
sp|P0ABU2|YCHF_ECOLI	P0ABU2	ychF	Ribosome-binding ATPase YchF	599324	728921	1.1473e+06	1.27455e+06	1.35583e+06	1.41486e+06	2.03266e+06	417214	1.30821e+06	1.84626e+06	1.1639e+06	1.09426e+06	1.91451e+06	1.61121e+06	1.25179e+06
sp|P0ABU5|ELBB_ECOLI	P0ABU5	elbB	Glyoxalase ElbB	119993	244156	606426	381222	580183	543650	386558	69548.6	380470	601369	778244	572340	827897	641287	573043
sp|P0ABV2|EXBD_ECOLI	P0ABV2	exbD	Biopolymer transport protein ExbD	14554.6	13213.7	18544.4	19287	23750.7	25813.9	32150.9	15079.8	18340.2	43889	28349	47381.2	35450.3	17087.9	22772.4
sp|P0ABZ1|FLIG_ECOLI	P0ABZ1	fliG	Flagellar motor switch protein FliG	195038	318886	775725	406373	553455	573966	394877	54056.4	478773	640624	821498	657059	783234	553658	647082
sp|P0ABZ4|KDSC_ECOLI	P0ABZ4	kdsC	3-deoxy-D-manno-octulosonate 8-phosphate phosphatase KdsC	53789.2	145938	297429	210613	300681	282692	423622	64593.4	226769	394651	378888	283497	419472	358455	341948
sp|P0ABZ6|SURA_ECOLI	P0ABZ6	surA	Chaperone SurA	442399	617848	1.34989e+06	837245	1.15203e+06	1.24553e+06	1.24181e+06	236854	1.03096e+06	1.21919e+06	1.58565e+06	1.3094e+06	1611696	1157879	1.23389e+06
sp|P0AC02|BAMD_ECOLI	P0AC02	bamD	Outer membrane protein assembly factor BamD	175293	318430	702604	459269	369758	462549	318519	108153	380805	390184	464916	719163	327006	333078	216596
sp|P0AC13|DHPS_ECOLI	P0AC13	folP	Dihydropteroate synthase	91221.4	170991	291109	290410	371023	343765	338855	100130	189552	244069	273087	279547	371310	387201	357943
sp|P0AC19|FOLX_ECOLI	P0AC19	folX	Dihydroneopterin triphosphate 2'-epimerase	328730	357298	571477	359912	619727	591249	400194	152449	512695	411779	571827	608602	440352	587451	594059
sp|P0AC33|FUMA_ECOLI	P0AC33	fumA	Fumarate hydratase class I, aerobic	1.38395e+06	1.99294e+06	3.94523e+06	4838206	6466905	6.06106e+06	2.8696e+06	513400	2.76806e+06	5.31158e+06	6.68104e+06	5.0073e+06	4882233	3.93547e+06	3.88934e+06
sp|P0AC41|SDHA_ECOLI	P0AC41	sdhA	Succinate dehydrogenase flavoprotein subunit	873067	1.23514e+06	2.1973e+06	3.04985e+06	3.48262e+06	3.23605e+06	2.48108e+06	493288	1728547	4.82178e+06	5.41834e+06	3.7263e+06	3.03562e+06	2.25783e+06	2.19083e+06
sp|P0AC47|FRDB_ECOLI	P0AC47	frdB	Fumarate reductase iron-sulfur subunit	218528	289498	550431	385999	486494	513754	379215	76513	412610	674779	705612	737304	823200	697654	731666
sp|P0AC53|G6PD_ECOLI	P0AC53	zwf	Glucose-6-phosphate 1-dehydrogenase	116652	179629	216267	293148	320573	279541	679449	92567.7	274291	612030	487642	281931	819458	421746	485971
sp|P0AC59|GLRX2_ECOLI	P0AC59	grxB	Glutaredoxin 2	183853	215692	592537	461316	609782	542906	527017	94230.1	188522	710754	932671	628926	787089	553415	457406
sp|P0AC62|GLRX3_ECOLI	P0AC62	grxC	Glutaredoxin 3	261583	393042	690604	572647	805127	729389	693554	194839	634581	657552	735863	749146	795541	768328	672270
sp|P0AC69|GLRX4_ECOLI	P0AC69	grxD	Glutaredoxin 4	303977	864456	1.85307e+06	1.42611e+06	2.09203e+06	1.83628e+06	2.3995e+06	278082	1.27286e+06	2.07877e+06	2.19651e+06	1.78907e+06	3637677	2.5664e+06	2.09378e+06
sp|P0AC84|GLO2_ECOLI	P0AC84	gloB	Hydroxyacylglutathione hydrolase GloB	24119	63028.3	174389	107946	138811	135991	153664	13084.1	110197	211024	262966	176976	123179	155696	124119
sp|P0AC92|GNSA_ECOLI	P0AC92	gnsA	Protein GnsA	75692.1	134993	291034	223073	382254	302885	403822	73261	257028	423625	404537	406150	440332	390413	351547
sp|P0ACA3|SSPA_ECOLI	P0ACA3	sspA	Stringent starvation protein A	349585	647934	1312755	959907	1.25315e+06	1.2584e+06	2293951	454161	1281387	1578636	1.84923e+06	1.39047e+06	2.23719e+06	1.71218e+06	1.5278e+06
sp|P0ACB0|DNAB_ECOLI	P0ACB0	dnaB	Replicative DNA helicase	30472.3	49954.9	169944	168803	195837	199565	314698	33266.8	124178	189616	204150	122525	214686	152686	170648
sp|P0ACB2|HEM2_ECOLI	P0ACB2	hemB	Delta-aminolevulinic acid dehydratase	94502.2	159035	498057	642208	504331	499626	993077	225371	273195	419278	532298	815265	893321	580219	673297
sp|P0ACC3|ERPA_ECOLI	P0ACC3	erpA	Iron-sulfur cluster insertion protein ErpA	774067	827490	1.39201e+06	1.10282e+06	1.54483e+06	1.5269e+06	1.50838e+06	350872	1239763	1.40885e+06	1.39986e+06	1.57858e+06	1.39572e+06	1.31885e+06	1.32773e+06
sp|P0ACC7|GLMU_ECOLI	P0ACC7	glmU	Bifunctional protein GlmU	247301	305872	597551	402340	574492	605532	812208	292385	451401	524440	376913	502559	741469	591590	640054
sp|P0ACD4|ISCU_ECOLI	P0ACD4	iscU	Iron-sulfur cluster assembly scaffold protein IscU	704404	944030	1896870	1.48189e+06	2.09992e+06	2.08505e+06	2142971	485860	1.77026e+06	2.40118e+06	2.24286e+06	2531969	2.41293e+06	1.84707e+06	1.95626e+06
sp|P0ACE3|HHA_ECOLI	P0ACE3	hha	Hemolysin expression-modulating protein Hha	15146.3	11181.1	39342.1	15464.1	22973.6	24734.8	19316.5	7506.09	29769.4	18030.6	16616.3	43772.7	29297.7	20612.2	28413.6
sp|P0ACE7|HINT_ECOLI	P0ACE7	hinT	Purine nucleoside phosphoramidase	194398	236688	534738	376821	544973	575458	382725	68667.7	365810	618275	657508	700275	757848	472908	533406
sp|P0ACF0|DBHA_ECOLI	P0ACF0	hupA	DNA-binding protein HU-alpha	7.4575e+06	8316512	11744708	10516594	11703013	11616754	9226112	4060827	9918841	10805887	11451197	11855777	10757489	11247096	10739965
sp|P0ACF4|DBHB_ECOLI	P0ACF4	hupB	DNA-binding protein HU-beta	36989.7	144824	361710	246573	430077	371301	448752	50417.5	256362	464361	682086	329825	851089	488224	455181
sp|P0ACF8|HNS_ECOLI	P0ACF8	hns	DNA-binding protein H-NS	2.76978e+06	3086565	6085064	4388324	6.0539e+06	6.6694e+06	4122751	984316	5.44221e+06	5153194	4997166	7.12998e+06	4.64185e+06	4698221	6596342
sp|P0ACG1|STPA_ECOLI	P0ACG1	stpA	DNA-binding protein StpA	352070	597747	1171855	694946	1.1007e+06	967069	1.83398e+06	473858	1.18695e+06	1.23249e+06	1394040	1.1145e+06	1.53462e+06	1511904	1.38474e+06
sp|P0ACJ0|LRP_ECOLI	P0ACJ0	lrp	Leucine-responsive regulatory protein	208448	254190	548073	480136	685754	648554	609585	133755	473579	694380	766147	612563	435879	240886	514773
sp|P0ACJ8|CRP_ECOLI	P0ACJ8	crp	DNA-binding transcriptional dual regulator CRP	1.09815e+06	1.44093e+06	2.26599e+06	2.2274e+06	2.53008e+06	2.3133e+06	2.73461e+06	624285	2.04601e+06	2.6536e+06	2613145	2.32336e+06	3.34544e+06	1.88323e+06	2.05308e+06
sp|P0ACL9|PDHR_ECOLI	P0ACL9	pdhR	Pyruvate dehydrogenase complex repressor	31291.2	32007.2	44072.9	56887.9	37322.5	37644.5	110470	9149.08	35837.6	47701.7	15232.3	15953.8	125158	94649.9	57007.6
sp|P0ACN4|ALLR_ECOLI	P0ACN4	allR	HTH-type transcriptional repressor AllR	44072.3	81148.2	155933	117026	142020	136754	193137	42163.6	144335	176228	221145	160533	212393	187821	154895
sp|P0ACN7|CYTR_ECOLI	P0ACN7	cytR	HTH-type transcriptional repressor CytR	46650.8	45925.7	98906.9	64422.5	100038	130177	98391.8	35431.6	104679	79304	104703	79498.5	62195.4	85897.5	81759.3
sp|P0ACP7|PURR_ECOLI	P0ACP7	purR	HTH-type transcriptional repressor PurR	44526.8	45690.4	48286.1	28374.2	61430.7	26955.1	132823	24170.7	48342.4	117906	129602	21845.8	320889	116257	89738.5
sp|P0ACQ4|OXYR_ECOLI	P0ACQ4	oxyR	Hydrogen peroxide-inducible genes activator	23297.5	29452.9	62732.6	77562.4	92346.4	90050.1	308235	27837.4	75319.7	147966	135104	91540	296662	145881	121420
sp|P0ACR9|MPRA_ECOLI	P0ACR9	mprA	Transcriptional repressor MprA	15937.8	30620.5	141899	87382.7	172962	166769	341118	10811.1	92967.4	237808	301828	164548	420761	284055	288093
sp|P0ACU7|YJDC_ECOLI	P0ACU7	yjdC	HTH-type transcriptional regulator YjdC	35793	56522.1	127553	99305.3	136136	122679	75177.3	19677.4	83166.6	128939	160626	154559	174037	132034	90893.8
sp|P0ACX3|YDHR_ECOLI	P0ACX3	ydhR	Putative monooxygenase YdhR	13516.5	33978.9	69781	102642	76349.6	65888.5	54868.2	5629.2	48918.9	147762	10153.8	147474	76239.1	75735.2	68806
sp|P0ACX5|FUMD_ECOLI	P0ACX5	fumD	Fumarase D	4213.47	13220.9	30307.4	20815.9	28970.5	23017.8	37209.3	3692.97	21291.3	37540.3	29395.6	35613.3	37758.6	33939.2	39153
sp|P0ACY1|YDJA_ECOLI	P0ACY1	ydjA	Putative NAD(P)H nitroreductase YdjA	375625	521324	1.18438e+06	721093	1.22507e+06	1.18316e+06	965266	194509	792794	1.24065e+06	1.35894e+06	1.09915e+06	1.28898e+06	1.15024e+06	1164878
sp|P0ACY9|YEBG_ECOLI	P0ACY9	yebG	Uncharacterized protein YebG	28698.8	79340.4	169607	150288	208701	233259	233921	34143.1	173213	53553.9	60218.3	123586	300768	267465	309311
sp|P0ACZ4|EVGA_ECOLI	P0ACZ4	evgA	DNA-binding transcriptional activator EvgA	20411.5	29693.3	78429.8	48605.6	71529.8	67683.9	73257.3	10539.8	55500.5	69175.3	63887.8	47763.8	96437.3	62880.9	52401.6
sp|P0AD07|YECF_ECOLI	P0AD07	yecF	Uncharacterized protein YecF	7051.21	24919	104777	59912.3	93621.9	90210.6	219286	10941.4	70172.8	119581	135052	77453.3	298510	122355	142549
sp|P0AD21|YEJG_ECOLI	P0AD21	yejG	Uncharacterized protein YejG	9360.16	7099.02	14708.4	50741.3	95536.9	74446.4	66300.1	10354.4	35581	64568.5	66580.3	63367.5	26804.8	61364.4	52634.6
sp|P0AD24|YEJL_ECOLI	P0AD24	yejL	UPF0352 protein YejL	18286.5	20773.9	282872	124086	228450	278594	240647	24887.6	266319	257592	265089	340410	276667	260128	311079
sp|P0AD33|YFCZ_ECOLI	P0AD33	yfcZ	UPF0381 protein YfcZ	387888	688759	970758	795505	940126	920680	497532	195326	575761	792818	951845	861647	1.5227e+06	1.57569e+06	1.15555e+06
sp|P0AD49|YFIA_ECOLI	P0AD49	raiA	Ribosome-associated inhibitor A	803991	893965	1.26431e+06	945603	1.13966e+06	1.16831e+06	1.34661e+06	472057	861464	1.34752e+06	1.56953e+06	1.32365e+06	1.18571e+06	1.12591e+06	1.07403e+06
sp|P0AD57|ISPB_ECOLI	P0AD57	ispB	Octaprenyl diphosphate synthase	14104.3	26322.8	63255.3	58829.1	76214.2	76037.1	190070	25229	49834.3	123638	127599	66946.5	190535	93107.8	74766
sp|P0AD59|IVY_ECOLI	P0AD59	ivy	Inhibitor of vertebrate lysozyme	24230.7	69324.1	166081	162582	314938	286625	115461	14732.5	100382	308564	464575	354868	206754	190919	202570
sp|P0AD61|KPYK1_ECOLI	P0AD61	pykF	Pyruvate kinase I	1.2509e+06	1.47717e+06	2880627	1.68427e+06	2345844	2.37279e+06	4439333	879889	2.19475e+06	3.08497e+06	3.42781e+06	2.98169e+06	3.58176e+06	2.23011e+06	2737204
sp|P0ADA3|NLPD_ECOLI	P0ADA3	nlpD	Murein hydrolase activator NlpD	82603.9	55078.6	153398	88461.9	95112.9	174259	131809	37049.5	68308.3	105708	138178	196186	93324.9	86224.8	75126.4
sp|P0ADA5|YAJG_ECOLI	P0ADA5	yajG	Uncharacterized lipoprotein YajG	46868.2	77942.9	191772	147528	181709	118256	154136	40493.9	84448.4	210609	189119	154613	158854	197074	233508
sp|P0ADB1|OSME_ECOLI	P0ADB1	osmE	Osmotically-inducible putative lipoprotein OsmE	89952.6	105125	197168	214259	255897	246919	157593	27571.9	76786.4	285645	335084	307783	40285.2	136856	136412
sp|P0ADE6|KBP_ECOLI	P0ADE6	kbp	Potassium binding protein Kbp	180359	193918	552129	270649	386973	476197	406554	75023.9	215995	500407	585187	1.05831e+06	160842	173185	247076
sp|P0ADE8|YGFZ_ECOLI	P0ADE8	ygfZ	tRNA-modifying protein YgfZ	802638	941514	1.98187e+06	1.26854e+06	1.96178e+06	1.58663e+06	2.3119e+06	543538	1.54424e+06	2.2246e+06	2.45413e+06	2.18493e+06	2.0498e+06	1.82185e+06	1618718
sp|P0ADG4|SUHB_ECOLI	P0ADG4	suhB	Nus factor SuhB	222044	267981	367253	430525	462746	454801	903363	246201	503776	542838	421597	396829	985246	629228	574966
sp|P0ADG7|IMDH_ECOLI	P0ADG7	guaB	Inosine-5'-monophosphate dehydrogenase	773310	923950	1936781	1.45223e+06	1.78757e+06	1.85071e+06	2.96207e+06	530241	1.13064e+06	1.62761e+06	1.59479e+06	1.25513e+06	3.47648e+06	2159581	2.40221e+06
sp|P0ADI7|YECD_ECOLI	P0ADI7	yecD	Isochorismatase family protein YecD	58575.2	53513.9	161032	87899.2	84845.6	96466.3	101161	25820.1	111917	116276	161886	123629	135499	100451	110253
sp|P0ADK0|YIAF_ECOLI	P0ADK0	yiaF	Uncharacterized protein YiaF	28104.8	43104.9	94396	73104.8	79883.4	107648	80411.9	22241.1	48820.9	79706.7	147818	82497.4	106875	61574.8	83098.9
sp|P0ADK8|YIBL_ECOLI	P0ADK8	yibL	Uncharacterized protein YibL	82630.2	111328	342729	159664	376277	354636	384567	60380.3	290478	314021	304904	380579	208761	318856	349997
sp|P0ADN2|YIFE_ECOLI	P0ADN2	yifE	UPF0438 protein YifE	32205.7	135232	343746	383213	677604	497650	727323	173626	277478	494868	732554	419410	864151	856876	693790
sp|P0ADQ2|FABY_ECOLI	P0ADQ2	fabY	Probable acyltransferase FabY	51641.8	93492.8	91999.6	191870	99294.4	102091	112445	26271.1	56643.1	286068	125794	104596	267446	82228.2	88665.9
sp|P0ADS2|ZAPA_ECOLI	P0ADS2	zapA	Cell division protein ZapA	105750	151032	245813	187809	235720	239570	393477	99451.8	224339	279813	318783	306808	320598	218834	271407
sp|P0ADS6|YGGE_ECOLI	P0ADS6	yggE	Uncharacterized protein YggE	41034.9	54953.3	123539	99082	153480	162991	380416	63183	80376.5	236161	363333	245354	304966	132501	159112
sp|P0ADS9|YGGN_ECOLI	P0ADS9	yggN	Uncharacterized protein YggN	188943	233224	327742	314050	373295	378526	289092	120626	291390	308297	312655	262995	344412	364066	350075
sp|P0ADT5|YGIC_ECOLI	P0ADT5	ygiC	Putative acid--amine ligase YgiC	154774	168914	274889	153244	221568	290875	148193	24427.9	287227	238670	278352	240266	449916	264999	271443
sp|P0ADU2|YGIN_ECOLI	P0ADU2	ygiN	Probable quinol monooxygenase YgiN	226554	281598	434374	329286	439721	423020	345068	161905	354664	475599	514200	532239	343257	425287	391721
sp|P0ADU5|YGIW_ECOLI	P0ADU5	ygiW	Protein YgiW	165648	179274	374045	141307	311329	333301	82822.9	29490.2	110198	393542	343736	447396	89318.1	125548	106094
sp|P0ADV1|LPTA_ECOLI	P0ADV1	lptA	Lipopolysaccharide export system protein LptA	67425.4	130000	304733	240586	341751	346382	239736	66195.1	209024	365464	425726	384651	421843	367321	347770
sp|P0ADW8|YHEV_ECOLI	P0ADW8	yheV	Uncharacterized protein YheV	4208.25	11692.4	60864	23647	31743.4	29102	93895.8	29477.5	46832	117244	42505.3	89455.1	96183.9	30965.8	66634.9
sp|P0ADX1|YHFA_ECOLI	P0ADX1	yhfA	Protein YhfA	85891.1	106766	252305	200283	265911	243002	213788	80432.8	156698	228795	280760	289409	206778	194438	207306
sp|P0ADY3|RL14_ECOLI	P0ADY3	rplN	50S ribosomal protein L14	542138	1034150	1.87349e+06	1.38452e+06	2.05246e+06	1.52357e+06	3.03202e+06	397512	1.51257e+06	2545459	2.56171e+06	1.70682e+06	3.85927e+06	2.25881e+06	2.22439e+06
sp|P0ADY7|RL16_ECOLI	P0ADY7	rplP	50S ribosomal protein L16	211303	453739	564309	524905	668584	474811	2.01767e+06	162282	575038	1.51219e+06	986364	458793	2.64255e+06	1.23812e+06	1.18927e+06
sp|P0ADZ7|YAJC_ECOLI	P0ADZ7	yajC	Sec translocon accessory complex subunit YajC	62172.8	88575.8	157164	102443	122304	117667	49284.3	49370.8	71583	84498.8	64255.6	39660.3	70323.2	82831.3	62989.2
sp|P0AE01|TRMJ_ECOLI	P0AE01	trmJ	tRNA (cytidine/uridine-2'-O-)-methyltransferase TrmJ	123287	174068	270953	275071	309404	254475	672106	109573	294644	452796	396530	266106	640432	386934	403500
sp|P0AE06|ACRA_ECOLI	P0AE06	acrA	Multidrug efflux pump subunit AcrA	15281.2	44173.8	144090	65021.6	119142	121083	118845	18698.5	48384.8	89930.1	72966.3	89451	160084	55766	72771.9
sp|P0AE08|AHPC_ECOLI	P0AE08	ahpC	Alkyl hydroperoxide reductase C	2.37905e+06	3.77656e+06	7.9161e+06	5.61646e+06	8364140	7.34132e+06	9088260	1.80681e+06	6312129	9772403	11771507	9138814	10063030	8044880	8.31119e+06
sp|P0AE18|MAP1_ECOLI	P0AE18	map	Methionine aminopeptidase	95338.6	210928	422888	348721	457425	436271	827935	174113	394612	515381	477098	477867	789892	460178	460148
sp|P0AE22|APHA_ECOLI	P0AE22	aphA	Class B acid phosphatase	180398	210251	494625	354758	476533	497354	451587	89516.9	361534	423520	448132	525854	400418	347891	432117
sp|P0AE52|BCP_ECOLI	P0AE52	bcp	Peroxiredoxin Bcp	870992	968017	1.78662e+06	1.24678e+06	1.66468e+06	1.72149e+06	1.21979e+06	331165	1452577	1.42859e+06	1584410	1919404	1.79272e+06	1.61334e+06	1.5938e+06
sp|P0AE67|CHEY_ECOLI	P0AE67	cheY	Chemotaxis protein CheY	377856	726081	1554766	1.164e+06	1553681	1.39207e+06	786117	79955	1.01925e+06	1.75096e+06	2.26448e+06	1541068	2.78468e+06	1.63735e+06	1.40688e+06
sp|P0AE85|CPXP_ECOLI	P0AE85	cpxP	Periplasmic protein CpxP	34976.2	45903.9	62907.8	45872.6	27660.9	54248.1	40159.2	11329.8	63118.4	60378.6	49936.1	69774.6	75423.5	77481	78572.9
sp|P0AE88|CPXR_ECOLI	P0AE88	cpxR	Transcriptional regulatory protein CpxR	9163.24	57137.4	267187	153444	260988	305567	437793	33527.3	167485	401174	455227	280446	768628	339262	291191
sp|P0AE91|CREA_ECOLI	P0AE91	creA	Protein CreA	106779	188328	333260	245769	299053	304284	297077	80450.4	296518	281414	301274	348790	320155	346071	269446
sp|P0AEB2|DACA_ECOLI	P0AEB2	dacA	D-alanyl-D-alanine carboxypeptidase DacA	162900	162585	631156	651655	521608	599714	727732	152592	362778	486403	520807	1.03928e+06	851536	380821	517070
sp|P0AEB7|YOAB_ECOLI	P0AEB7	yoaB	RutC family protein YoaB	220394	277275	662953	389287	706719	679112	341393	70675.2	379764	592684	781972	653155	527772	661381	643434
sp|P0AEC3|ARCB_ECOLI	P0AEC3	arcB	Aerobic respiration control sensor protein ArcB	42679	80401.9	154343	142589	204921	149782	95708.7	20005.8	115252	141765	230232	182042	231058	180652	181989
sp|P0AED0|USPA_ECOLI	P0AED0	uspA	Universal stress protein A	56995.1	359407	813676	436772	743826	691332	722832	207778	461391	852282	1.13393e+06	742473	952995	643240	662949
sp|P0AED5|UVRY_ECOLI	P0AED5	uvrY	Response regulator UvrY	129235	103352	252580	204601	255590	189965	222100	34454	118204	313624	117196	80991.7	434696	304141	276586
sp|P0AED7|DAPE_ECOLI	P0AED7	dapE	Succinyl-diaminopimelate desuccinylase	76451.9	93975.1	341919	151736	227879	234726	347832	41729.4	265484	478063	478486	378185	150347	344996	248738
sp|P0AEE1|DCRB_ECOLI	P0AEE1	dcrB	Inner membrane lipoprotein DcrB	45973.3	52538.5	167478	110507	207307	210983	280481	54098.2	93403.5	123529	105437	128933	175281	100364	131112
sp|P0AEE5|MGLB_ECOLI	P0AEE5	mglB	D-galactose/methyl-galactoside binding periplasmic protein MglB	4.33167e+06	6.10267e+06	10088269	12351130	14607941	13765495	3264840	461616	9451567	14383421	17308354	12913294	14692906	11297046	10399679
sp|P0AEG4|DSBA_ECOLI	P0AEG4	dsbA	Thiol:disulfide interchange protein DsbA	205927	454679	817667	776837	1.01802e+06	898021	646485	209093	852321	1.14805e+06	1.43097e+06	1.06232e+06	1.38082e+06	1.38253e+06	1.03148e+06
sp|P0AEG6|DSBC_ECOLI	P0AEG6	dsbC	Thiol:disulfide interchange protein DsbC	174581	198549	364393	305213	465911	386656	401966	116247	367078	468968	583748	448186	571147	527747	440483
sp|P0AEI1|MIAB_ECOLI	P0AEI1	miaB	tRNA-2-methylthio-N(6)-dimethylallyladenosine synthase	229523	287512	326222	486999	294027	326297	1.00202e+06	245476	268503	545141	726797	303048	1.39906e+06	534300	647814
sp|P0AEI4|RIMO_ECOLI	P0AEI4	rimO	Ribosomal protein S12 methylthiotransferase RimO	124133	141801	164181	151978	159872	165389	644315	174161	202826	264365	210336	159342	410224	261559	280489
sp|P0AEK2|FABG_ECOLI	P0AEK2	fabG	3-oxoacyl-[acyl-carrier-protein] reductase FabG	328316	382535	655747	497439	638986	587125	1.22259e+06	268989	686735	725365	775378	534149	1.18435e+06	691088	774962
sp|P0AEK4|FABI_ECOLI	P0AEK4	fabI	Enoyl-[acyl-carrier-protein] reductase [NADH] FabI	701228	784897	1.45823e+06	1105225	1.36069e+06	1.36089e+06	1794689	482840	1.56277e+06	1.37762e+06	1.25729e+06	1.36986e+06	3.26657e+06	1.71687e+06	1.73631e+06
sp|P0AEL6|FEPB_ECOLI	P0AEL6	fepB	Ferric enterobactin-binding periplasmic protein FepB	26241.9	8794.76	13238.3	43531.3	63311	60654.1	65876.2	16251.6	53470.6	52445.9	69404.8	89021	49528.6	57412.1	41920.8
sp|P0AEM0|FKBX_ECOLI	P0AEM0	fkpB	FKBP-type 16 kDa peptidyl-prolyl cis-trans isomerase	41033	71650.3	195500	111588	191943	176866	176146	15107.9	139743	182089	224187	190554	455790	179811	220081
sp|P0AEM4|FLGM_ECOLI	P0AEM4	flgM	Negative regulator of flagellin synthesis	260544	333507	746772	389057	575418	663145	268513	56825.1	458328	425818	361260	567084	497931	478146	562367
sp|P0AEM6|FLIA_ECOLI	P0AEM6	fliA	RNA polymerase sigma factor FliA	266774	421433	801944	401942	563376	614429	325729	89730.6	509996	478934	410938	552006	833852	430121	771871
sp|P0AEM9|TCYJ_ECOLI	P0AEM9	tcyJ	L-cystine-binding protein TcyJ	152743	238055	395650	408247	535106	529826	125786	11897.1	280569	635194	1.13484e+06	527054	872319	722042	560272
sp|P0AEN1|FRE_ECOLI	P0AEN1	fre	NAD(P)H-flavin reductase	105270	151766	199827	178720	215732	178228	395188	147823	243037	199996	198444	195422	333666	197462	188871
sp|P0AEP3|GALU_ECOLI	P0AEP3	galU	UTP--glucose-1-phosphate uridylyltransferase	392711	491017	749923	712099	999808	852754	1.40825e+06	355470	768216	1.30408e+06	1.30316e+06	883470	1.49832e+06	1.16675e+06	1.11623e+06
sp|P0AEQ3|GLNH_ECOLI	P0AEQ3	glnH	Glutamine-binding periplasmic protein	328182	603334	1.34149e+06	1.98688e+06	3.42936e+06	3.25318e+06	1.72664e+06	177608	1.21882e+06	1922896	2.60271e+06	1.63498e+06	2.87042e+06	2724142	2159810
sp|P0AES4|GYRA_ECOLI	P0AES4	gyrA	DNA gyrase subunit A	174987	196651	292300	396631	438427	340782	857539	84743.1	368224	807356	901359	353400	1.35092e+06	737083	675898
sp|P0AES6|GYRB_ECOLI	P0AES6	gyrB	DNA gyrase subunit B	113855	180658	209825	331325	439701	401726	734126	117003	273246	553376	569375	289659	1.15992e+06	501185	545039
sp|P0AET2|HDEB_ECOLI	P0AET2	hdeB	Acid stress chaperone HdeB	103926	262324	448846	244188	355578	361376	560759	85345.3	188677	505301	739735	559597	526240	464716	470503
sp|P0AET8|HDHA_ECOLI	P0AET8	hdhA	7alpha-hydroxysteroid dehydrogenase	101327	136624	181891	107961	251980	188703	134636	34545.4	131964	245668	245639	284241	160135	118558	196572
sp|P0AEU0|HISJ_ECOLI	P0AEU0	hisJ	Histidine-binding periplasmic protein	520877	731839	944742	1134426	1.52149e+06	1.42623e+06	463466	154455	998167	1.04323e+06	1.40382e+06	1.36619e+06	1.21233e+06	1.04823e+06	1.00368e+06
sp|P0AEU7|SKP_ECOLI	P0AEU7	skp	Chaperone protein Skp	1.00233e+06	1.32933e+06	2.18493e+06	1.76469e+06	1.94771e+06	2.59014e+06	3.14163e+06	714488	1.71714e+06	2.62991e+06	3.20969e+06	2.54701e+06	2.41153e+06	2032917	2.3242e+06
sp|P0AEW4|CPDA_ECOLI	P0AEW4	cpdA	3',5'-cyclic adenosine monophosphate phosphodiesterase CpdA	36896.8	56646.6	103727	81514.2	95894.1	97148.9	110132	19586.1	49149.3	134581	136213	123879	133736	116099	93414.9
sp|P0AEX9|MALE_ECOLI	P0AEX9	malE	Maltose/maltodextrin-binding periplasmic protein	519981	1.01439e+06	3.20656e+06	1.40145e+06	2.3706e+06	2.42264e+06	805093	123984	1.42129e+06	3.0505e+06	3.81313e+06	2.15062e+06	3.24832e+06	1.77156e+06	1.74741e+06
sp|P0AEZ3|MIND_ECOLI	P0AEZ3	minD	Septum site-determining protein MinD	456417	623104	1.22713e+06	844785	1.14099e+06	1.12212e+06	1.13246e+06	188418	988320	1.2448e+06	1.27535e+06	1.20954e+06	1.34251e+06	1.20827e+06	1.2618e+06
sp|P0AEZ9|MOAB_ECOLI	P0AEZ9	moaB	Molybdenum cofactor biosynthesis protein B	319999	404152	710684	500674	608373	620587	753573	245842	477509	860313	950128	907348	659136	597925	565434
sp|P0AF03|MOG_ECOLI	P0AF03	mog	Molybdopterin adenylyltransferase	472614	571506	378768	641839	776821	845258	616378	176212	582096	242254	257095	260576	583494	291907	311116
sp|P0AF08|APBC_ECOLI	P0AF08	mrp	Iron-sulfur cluster carrier protein	29342.2	155660	387600	341058	538992	462891	900020	58089.1	298834	674018	768177	439185	911636	616523	599690
sp|P0AF12|MTNN_ECOLI	P0AF12	mtnN	5'-methylthioadenosine/S-adenosylhomocysteine nucleosidase	191203	171678	316555	246431	307411	297706	527480	162774	371806	323600	379020	326844	481821	349194	347482
sp|P0AF18|NAGA_ECOLI	P0AF18	nagA	N-acetylglucosamine-6-phosphate deacetylase	77012.1	145770	357769	241560	364340	309900	421517	32939.6	198385	531682	618353	413304	528469	338467	345374
sp|P0AF28|NARL_ECOLI	P0AF28	narL	Nitrate/nitrite response regulator protein NarL	27558.6	231982	209795	322649	447406	397385	181803	64145.9	184295	196905	218574	190833	380393	344738	535597
sp|P0AF36|ZAPB_ECOLI	P0AF36	zapB	Cell division protein ZapB	28813.7	90084.5	220966	270970	453585	341104	480196	16777.4	236707	496577	510058	394380	525197	381357	472570
sp|P0AF50|YJBR_ECOLI	P0AF50	yjbR	Uncharacterized protein YjbR	155426	203656	411269	302827	435752	403071	316622	89721	196644	400201	439260	433900	296487	321210	285440
sp|P0AF63|NSRR_ECOLI	P0AF63	nsrR	HTH-type transcriptional repressor NsrR	13363.5	31875.2	82559.1	27553.1	78137.4	72807	64322.3	9217.99	52093.7	52482.3	27183.2	136505	26411.2	68013.2	69620.3
sp|P0AF67|TSAE_ECOLI	P0AF67	tsaE	tRNA threonylcarbamoyladenosine biosynthesis protein TsaE	43154.2	82704.6	215970	122985	228054	207455	315886	39395	131429	279506	282225	225616	339000	216735	245714
sp|P0AF93|RIDA_ECOLI	P0AF93	ridA	2-iminobutanoate/2-iminopropanoate deaminase	1.9389e+06	2.69433e+06	3773596	3.71209e+06	4761031	4992523	1694263	667333	2.20261e+06	1.95746e+06	2627919	2.86932e+06	3.54704e+06	4.44109e+06	4108654
sp|P0AFB8|NTRC_ECOLI	P0AFB8	glnG	DNA-binding transcriptional regulator NtrC	74132.3	54846.7	9504.84	172182	124748	68126.3	37619	75540.2	11251.3	97600.3	24534.6	9071.36	104095	151205	25362.9
sp|P0AFC7|NUOB_ECOLI	P0AFC7	nuoB	NADH-quinone oxidoreductase subunit B	172509	160505	335541	337335	349477	408133	384184	123522	395096	479713	442249	427177	434499	402816	350326
sp|P0AFD1|NUOE_ECOLI	P0AFD1	nuoE	NADH-quinone oxidoreductase subunit E	35106.2	114538	300107	250891	370363	342107	259100	25230.1	277747	418748	550716	397239	547998	371501	365490
sp|P0AFF6|NUSA_ECOLI	P0AFF6	nusA	Transcription termination/antitermination protein NusA	848910	1.07653e+06	2.33435e+06	1.7459e+06	2267844	2.28383e+06	3.34413e+06	743920	2.14055e+06	2354026	2668675	2214419	3.96525e+06	2365818	2.58733e+06
sp|P0AFG0|NUSG_ECOLI	P0AFG0	nusG	Transcription termination/antitermination protein NusG	489577	562301	987556	392152	1.01039e+06	1.06941e+06	1.26352e+06	366575	1.09301e+06	1.08671e+06	1.08374e+06	916404	1.53564e+06	1.03917e+06	1.13046e+06
sp|P0AFG6|ODO2_ECOLI	P0AFG6	sucB	Dihydrolipoyllysine-residue succinyltransferase component of 2-oxoglutarate dehydrogenase complex	531546	706214	732301	1.74178e+06	1.913e+06	1.56987e+06	1.20385e+06	235241	967300	276346	281953	177685	2.12826e+06	1.40577e+06	1437868
sp|P0AFG8|ODP1_ECOLI	P0AFG8	aceE	Pyruvate dehydrogenase E1 component	1.81111e+06	2.14943e+06	2.42705e+06	2.68934e+06	2.73594e+06	2449665	3.90615e+06	995882	2.11856e+06	3856056	3.83071e+06	2384565	5851394	3524731	3.67295e+06
sp|P0AFH8|OSMY_ECOLI	P0AFH8	osmY	Osmotically-inducible protein Y	1.22584e+06	1.3663e+06	1.9233e+06	2275214	2.55374e+06	2559541	1.33515e+06	533454	1.23091e+06	4144891	4.59306e+06	4.84081e+06	1410577	1.21149e+06	1.2656e+06
sp|P0AFI2|PARC_ECOLI	P0AFI2	parC	DNA topoisomerase 4 subunit A	39920.1	51155.1	43118.9	116517	95570	94462	234811	9179.7	89716.7	154333	147103	37569.8	207355	154122	111972
sp|P0AFI7|PDXH_ECOLI	P0AFI7	pdxH	Pyridoxine/pyridoxamine 5'-phosphate oxidase	89861.4	85397.7	87447.3	47905.6	69187.8	90158	67454.3	17314.3	74842.2	143097	174218	205640	158458	79777.3	120355
sp|P0AFJ1|YJDM_ECOLI	P0AFJ1	yjdM	Protein YjdM	136488	29639.2	1.49433e+06	56777.3	85402.7	1.5896e+06	74134.2	6435.88	57195.5	63580.8	1.59573e+06	467063	943945	87134.1	94227.9
sp|P0AFK0|PMBA_ECOLI	P0AFK0	pmbA	Metalloprotease PmbA	186638	274130	275199	315400	353299	368530	695465	166749	299571	384525	415889	405568	439549	267488	307188
sp|P0AFK9|POTD_ECOLI	P0AFK9	potD	Spermidine/putrescine-binding periplasmic protein	113719	213026	354783	353305	504338	492178	268357	72449.5	412366	506513	472589	520157	664734	567787	521767
sp|P0AFM2|PROX_ECOLI	P0AFM2	proX	Glycine betaine/proline betaine-binding periplasmic protein	26166.3	58979.5	176536	139981	361107	170945	156941	9438.44	207961	140076	344512	209218	449861	308754	456412
sp|P0AFM6|PSPA_ECOLI	P0AFM6	pspA	Phage shock protein A	72143.7	155414	377931	160355	417463	365707	330336	52972.5	321434	303028	402517	332442	880258	533408	529152
sp|P0AFP6|GCH1L_ECOLI	P0AFP6	ybgI	GTP cyclohydrolase 1 type 2 homolog	70579.7	159008	500020	283123	492204	490642	542220	58481	277815	596824	713220	487122	561738	465102	511782
sp|P0AFQ7|YCFH_ECOLI	P0AFQ7	ycfH	Uncharacterized metal-dependent hydrolase YcfH	26245.9	33232.3	109170	60487.8	95943.2	105541	54375.8	24702.4	78164.1	157226	215775	111544	216304	124476	108508
sp|P0AFR4|YCIO_ECOLI	P0AFR4	yciO	Uncharacterized protein YciO	259589	314442	477346	443313	573659	554327	473821	171994	417320	595324	598125	621738	627806	500868	565510
sp|P0AFU8|RISA_ECOLI	P0AFU8	ribC	Riboflavin synthase	81453.1	90229.7	215579	114972	208327	234579	275514	47240.8	176295	249267	345086	165073	375104	222794	220147
sp|P0AFW0|RFAH_ECOLI	P0AFW0	rfaH	Transcription antitermination protein RfaH	27311	51865.9	96278.5	95822.7	128218	106895	194587	32103.2	106854	73363.5	92407.7	116959	139787	132931	145132
sp|P0AFW8|ROF_ECOLI	P0AFW8	rof	Protein rof	12474.8	62910.3	137030	97289.4	170554	131520	200923	16691.9	72088.3	191473	203310	157996	173626	153502	149012
sp|P0AFX0|HPF_ECOLI	P0AFX0	hpf	Ribosome hibernation promoting factor	47145.9	136909	321806	271307	389903	369116	311088	113140	189127	468168	569230	382305	437228	478035	336245
sp|P0AFX4|RSD_ECOLI	P0AFX4	rsd	Regulator of sigma D	23381.3	45477.4	77658.7	74602.9	86511.6	91167.4	35703.2	21578.7	64309.8	108637	107687	92604.2	70991.6	65725.1	62694.5
sp|P0AFX9|RSEB_ECOLI	P0AFX9	rseB	Sigma-E factor regulatory protein RseB	57729.9	27282.8	159622	104381	143900	85435	168101	22707	86965.1	130618	173310	168785	166654	55868.9	151973
sp|P0AFY8|SEQA_ECOLI	P0AFY8	seqA	Negative modulator of initiation of replication	136235	194845	459623	335399	534746	479512	865644	138942	481503	635070	597728	502531	661509	557788	579828
sp|P0AFZ3|SSPB_ECOLI	P0AFZ3	sspB	Stringent starvation protein B	193029	236651	293170	312824	331293	339297	299539	147325	290861	333483	409181	390105	269874	354966	359159
sp|P0AG07|RPE_ECOLI	P0AG07	rpe	Ribulose-phosphate 3-epimerase	76939.4	78937.1	185528	107986	175531	172036	259347	57147.8	114521	170577	249800	147513	226642	171113	183391
sp|P0AG18|PURE_ECOLI	P0AG18	purE	N5-carboxyaminoimidazole ribonucleotide mutase	31948.5	33946.8	59211.4	38824.6	46274.1	52935.3	77760.6	24807.1	64140.7	24292	44722.1	47235.9	66076.4	68892.9	72362.7
sp|P0AG30|RHO_ECOLI	P0AG30	rho	Transcription termination factor Rho	1.24928e+06	726401	1.29995e+06	1.06536e+06	1.45006e+06	1.34866e+06	2.33454e+06	929543	1.76135e+06	1.57571e+06	1.52649e+06	1.26659e+06	2354346	1.35615e+06	1703282
sp|P0AG40|RIBF_ECOLI	P0AG40	ribF	Bifunctional riboflavin kinase/FMN adenylyltransferase	15785.1	34057.9	36814.7	73455.5	42358.6	16881.6	58457.4	10298.8	30459.5	57656.5	58419.3	31102	89835.9	76647.7	32520.7
sp|P0AG44|RL17_ECOLI	P0AG44	rplQ	50S ribosomal protein L17	1.54974e+06	1.58103e+06	2.00009e+06	1847841	1.7546e+06	1.51074e+06	3965146	1.18795e+06	2.06837e+06	3.02677e+06	2529842	1510853	4346758	2.45098e+06	2.73701e+06
sp|P0AG48|RL21_ECOLI	P0AG48	rplU	50S ribosomal protein L21	3.03725e+06	3.76282e+06	6.78072e+06	4.65349e+06	5.16016e+06	6.42114e+06	5.06699e+06	2.40209e+06	7076403	4936799	4683330	6202590	4374558	6.21299e+06	6.62435e+06
sp|P0AG51|RL30_ECOLI	P0AG51	rpmD	50S ribosomal protein L30	871996	1.10734e+06	931704	1261975	1.05137e+06	1.37631e+06	510310	718102	2831691	545569	435172	1.32973e+06	192371	791235	1.39307e+06
sp|P0AG55|RL6_ECOLI	P0AG55	rplF	50S ribosomal protein L6	5517838	6405106	10182060	7.56612e+06	10221384	9966685	11118137	3.91687e+06	10143439	9371904	8622515	9568417	10189396	9801891	11046603
sp|P0AG59|RS14_ECOLI	P0AG59	rpsN	30S ribosomal protein S14	70306.6	116586	203068	214148	273858	246109	837523	39358.7	208601	617124	550044	211039	1.13993e+06	502457	379286
sp|P0AG67|RS1_ECOLI	P0AG67	rpsA	30S ribosomal protein S1	3615466	5.64534e+06	14935756	10713954	15146321	14459171	24592152	4.2826e+06	12929921	18882074	20559468	15146771	25874006	17286414	17807996
sp|P0AG86|SECB_ECOLI	P0AG86	secB	Protein-export protein SecB	731272	860612	1.57898e+06	1.38176e+06	1.61577e+06	1.66946e+06	2.17202e+06	566680	1.36166e+06	1.61367e+06	1.78799e+06	1.64277e+06	1.84243e+06	1.7478e+06	1.68658e+06
sp|P0AGB6|RPOE_ECOLI	P0AGB6	rpoE	ECF RNA polymerase sigma-E factor	24246.6	47644.6	204099	72298.3	185942	189760	274162	16422.4	77008	266809	227098	101817	238236	190721	212239
sp|P0AGD3|SODF_ECOLI	P0AGD3	sodB	Superoxide dismutase [Fe]	406681	1.09431e+06	3.34944e+06	1.3723e+06	3.43761e+06	2518044	1709970	193905	1.72735e+06	2.48863e+06	2688515	2.39205e+06	3213047	2.81549e+06	2.88594e+06
sp|P0AGD7|SRP54_ECOLI	P0AGD7	ffh	Signal recognition particle protein	491969	676633	1.03274e+06	779721	1.08542e+06	979895	1.2386e+06	381684	859404	954263	968328	930575	1284208	920109	1.02062e+06
sp|P0AGE0|SSB_ECOLI	P0AGE0	ssb	Single-stranded DNA-binding protein	326209	433273	785606	493566	696202	647326	653446	177113	607980	597495	602192	703706	754316	612753	670246
sp|P0AGE6|CHRR_ECOLI	P0AGE6	chrR	Quinone reductase	12116.7	39322.7	109613	78696.9	150532	140660	246324	21943	61158.2	198832	224337	159836	240601	140196	121280
sp|P0AGE9|SUCD_ECOLI	P0AGE9	sucD	Succinate--CoA ligase [ADP-forming] subunit alpha	1989158	2.46945e+06	4.93078e+06	4783045	6.49246e+06	6274350	3542674	507895	3497525	4125971	4.72819e+06	3801969	5.27438e+06	3.9382e+06	4299449
sp|P0AGG4|THIO2_ECOLI	P0AGG4	trxC	Thioredoxin 2	65580.2	119630	223174	309855	357965	348983	293526	44392	197370	368716	382248	330659	281372	285392	269754
sp|P0AGG8|TLDD_ECOLI	P0AGG8	tldD	Metalloprotease TldD	102758	98610.2	143284	176367	127309	136263	264706	69622.6	112597	203407	199368	415785	192974	121053	114905
sp|P0AGJ2|TRMH_ECOLI	P0AGJ2	trmH	tRNA (guanosine(18)-2'-O)-methyltransferase	58595.4	74266.4	41266.5	22628	64036.5	34951.9	91964.2	12461.3	50037.7	58865.4	66705.1	167497	79637	43634.8	46467.7
sp|P0AGJ5|YFIF_ECOLI	P0AGJ5	yfiF	Uncharacterized tRNA/rRNA methyltransferase YfiF	201079	263236	610543	458404	523018	527789	833408	188439	512448	682085	674714	605690	915814	551893	556354
sp|P0AGJ7|TRML_ECOLI	P0AGJ7	trmL	tRNA (cytidine(34)-2'-O)-methyltransferase	60885.7	60232.6	94288.8	94611.9	139725	140053	166509	51167.5	86981.2	41006.4	72179.1	71832.7	180591	40305.2	151964
sp|P0AGJ9|SYY_ECOLI	P0AGJ9	tyrS	Tyrosine--tRNA ligase	100619	75632.2	128110	188136	190399	28921.3	391120	18761.7	91219.1	316173	224104	149251	505047	219646	228816
sp|P0AGK4|YHBY_ECOLI	P0AGK4	yhbY	RNA-binding protein YhbY	315975	354525	447036	440671	673687	487483	846706	196610	622306	621603	588920	606524	729355	632213	759690
sp|P0AGL5|RATA_ECOLI	P0AGL5	ratA	Ribosome association toxin RatA	31639.5	44606.5	63453.3	63811.5	82313.5	65773.7	80414.9	11908.1	51943.1	97037.2	97488.6	66467.1	102859	78046.1	68159.4
sp|P0AGL7|RSME_ECOLI	P0AGL7	rsmE	Ribosomal RNA small subunit methyltransferase E	11918.6	33839.5	107745	99038.7	108178	104084	198526	21437.6	107530	150831	151476	113244	193329	121025	138277
sp|P0C018|RL18_ECOLI	P0C018	rplR	50S ribosomal protein L18	293445	25745	64693.8	28864.4	78563.7	65408.2	160449	14758.4	66999	75822.2	117591	476271	191404	48182.1	574866
sp|P0C037|PPNP_ECOLI	P0C037	ppnP	Pyrimidine/purine nucleoside phosphorylase	322237	285906	531902	381349	495317	529958	325709	96988.5	364139	410931	368201	584313	348484	399243	432637
sp|P0C054|IBPA_ECOLI	P0C054	ibpA	Small heat shock protein IbpA	62862.7	83871.2	87342.2	92148.9	115787	102410	350510	105318	285577	152459	295498	171674	128643	141633	249539
sp|P0C058|IBPB_ECOLI	P0C058	ibpB	Small heat shock protein IbpB	22282.5	48206.3	107827	114690	165858	199179	459129	93090.7	264316	499362	570887	549668	197603	243894	233877
sp|P0C079|RELB_ECOLI	P0C079	relB	Antitoxin RelB	120358	156820	250091	89978.7	241451	254038	92850.7	19626.2	92405	84274.8	112059	213989	290364	279868	271350
sp|P0C0K3|SRKA_ECOLI	P0C0K3	srkA	Stress response kinase A	70197.4	36337.4	155828	79059	118068	140195	137223	8039.2	133394	71577.9	86128.2	117261	241074	122927	208406
sp|P0C0L2|OSMC_ECOLI	P0C0L2	osmC	Peroxiredoxin OsmC	468984	577013	1.21181e+06	690709	894081	925108	849608	244846	417181	1.97714e+06	2.05056e+06	1.91357e+06	859997	740202	605864
sp|P0C0R7|RLME_ECOLI	P0C0R7	rlmE	Ribosomal RNA large subunit methyltransferase E	55075.2	71923.4	80085.9	73476.3	74252.3	37606.7	73385	17496.4	50790.4	102080	68037.3	70735.7	114345	69799.1	75572.3
sp|P0C0V0|DEGP_ECOLI	P0C0V0	degP	Periplasmic serine endoprotease DegP	612976	1.09025e+06	2.06649e+06	1.32606e+06	1.79826e+06	1.83091e+06	2.04901e+06	475232	1.51275e+06	1.99688e+06	2134422	1.97529e+06	2.43612e+06	2.00464e+06	1.79925e+06
sp|P0C8J6|GATY_ECOLI	P0C8J6	gatY	D-tagatose-1,6-bisphosphate aldolase subunit GatY	846980	929641	3.16298e+06	2.14851e+06	3.69882e+06	3.26864e+06	2.15134e+06	96764.4	1.29444e+06	6245475	7204713	4.41012e+06	3910527	2.17514e+06	2.40914e+06
sp|P0C8J8|GATZ_ECOLI	P0C8J8	gatZ	D-tagatose-1,6-bisphosphate aldolase subunit GatZ	1407062	1.57415e+06	3.22861e+06	2052405	2.24288e+06	2.14581e+06	1.43219e+06	240283	1.53049e+06	4.48138e+06	4.05176e+06	3.50807e+06	2.8954e+06	1.74519e+06	1.99042e+06
sp|P0CE47|EFTU1_ECOLI	P0CE47	tufA	Elongation factor Tu 1	18275384	23949600	38408612	34879328	38887064	37208584	51168396	17785078	33621956	37932020	40592804	36918240	57573040	39501556	42157412
sp|P0CG19|RNPH_ECOLI	P0CG19	rph	Truncated inactive ribonuclease PH	47227.2	79858.9	121370	143011	164137	161995	277942	56503.2	108042	128029	113367	75310.7	413346	219185	232981
sp|P0DMC7|RCSB_ECOLI	P0DMC7	rcsB	Transcriptional regulatory protein RcsB	7725.7	93226.7	247978	146046	247461	255264	424779	16569.5	169080	333349	439864	223767	464022	307110	280308
sp|P0DTT0|BIPA_ECOLI	P0DTT0	bipA	50S ribosomal subunit assembly factor BipA	474363	542592	784013	981273	1237292	1.11272e+06	2.70985e+06	447260	972180	1.44046e+06	1.32687e+06	1.00648e+06	2061289	1240996	1.5031e+06
sp|P10100|RLPA_ECOLI	P10100	rlpA	Endolytic peptidoglycan transglycosylase RlpA	11579.5	11687	61423.4	42029.6	46291.4	51712.6	78633.3	5490.43	48500.1	82748.1	56560.5	71656.5	83724.4	30713.2	65668.3
sp|P10121|FTSY_ECOLI	P10121	ftsY	Signal recognition particle receptor FtsY	214995	239682	565022	377533	601464	464930	918668	260283	551766	481859	481461	454636	707640	480341	478440
sp|P10346|GLNQ_ECOLI	P10346	glnQ	Glutamine transport ATP-binding protein GlnQ	102873	96502.6	150372	233032	268632	194350	305275	79471.1	171116	206007	202295	159056	250200	185085	164742
sp|P10408|SECA_ECOLI	P10408	secA	Protein translocase subunit SecA	116505	112294	122324	276442	259135	151298	708883	55479.1	198789	617352	619167	177615	910343	419917	416371
sp|P10442|RNH2_ECOLI	P10442	rnhB	Ribonuclease HII	51278.8	48445.7	85960.4	56316.6	32720.2	31321.3	66967.8	27523.5	83171.3	47781.3	12681.4	16004.6	38528.9	285792	36378.6
sp|P10908|UGPQ_ECOLI	P10908	ugpQ	Glycerophosphodiester phosphodiesterase, cytoplasmic	6573.13	26297.1	55697.9	25019.9	53461.2	75142.9	63465.4	19516.1	27513.3	147122	161031	112463	48977.8	60911.2	31205.7
sp|P11875|SYR_ECOLI	P11875	argS	Arginine--tRNA ligase	337812	513280	802500	754543	838197	888862	1719977	386458	997169	950055	1.05774e+06	774873	1725280	1080079	1.05819e+06
sp|P12008|AROC_ECOLI	P12008	aroC	Chorismate synthase	53187.9	90534.6	162707	172958	197683	186739	216921	47126.1	111519	209514	345294	173995	334106	239855	174939
sp|P12281|MOEA_ECOLI	P12281	moeA	Molybdopterin molybdenumtransferase	80328.5	105228	199728	152071	151460	194381	298716	49390.1	51528.9	222187	230013	136060	370918	185933	177335
sp|P12758|UDP_ECOLI	P12758	udp	Uridine phosphorylase	369201	545964	1010207	837397	1.02717e+06	967511	1.54179e+06	310299	796142	1.85861e+06	2.00784e+06	1.47612e+06	1.84456e+06	1.15006e+06	1120999
sp|P13016|AMPD_ECOLI	P13016	ampD	1,6-anhydro-N-acetylmuramyl-L-alanine amidase AmpD	42506.6	59592	96313.2	85191.2	120977	86761.8	129657	21721.5	44286.1	103596	104488	101216	113569	126548	93833.3
sp|P13024|FDHE_ECOLI	P13024	fdhE	Protein FdhE	17889	52791.3	87140.9	96098.2	98146.3	84490.6	374112	20656.6	172969	195409	255819	96644.8	155814	124282	233983
sp|P13029|KATG_ECOLI	P13029	katG	Catalase-peroxidase	226296	375026	546002	556119	633956	540779	757097	92987.8	221850	879676	949473	702367	1.33814e+06	766114	703662
sp|P13035|GLPD_ECOLI	P13035	glpD	Aerobic glycerol-3-phosphate dehydrogenase	973246	1.38361e+06	2.75012e+06	2.8703e+06	3.27823e+06	2.77093e+06	4048943	860957	2.16685e+06	4.2044e+06	4.97622e+06	3.0897e+06	5600670	3569131	3393374
sp|P14175|PROV_ECOLI	P14175	proV	Glycine betaine/proline betaine transport system ATP-binding protein ProV	130279	109852	296708	201821	274669	269231	506761	142372	325082	219267	192510	215927	403017	252506	399540
sp|P14900|MURD_ECOLI	P14900	murD	UDP-N-acetylmuramoylalanine--D-glutamate ligase	17175.1	30894.9	511998	59501.4	522974	106225	171380	93626.4	304657	210371	243462	593935	216539	412972	424161
sp|P15028|FECB_ECOLI	P15028	fecB	Fe(3+) dicitrate-binding periplasmic protein	49368.3	26261.7	18292.4	78637	52497.6	42677.9	131568	44138	117720	70161.3	45253.5	101926	187152	28424.8	40275.5
sp|P15034|AMPP_ECOLI	P15034	pepP	Xaa-Pro aminopeptidase	32179.9	130307	213448	191734	379074	308642	149186	11295.8	147699	254210	380458	287707	462210	453603	363786
sp|P15042|DNLJ_ECOLI	P15042	ligA	DNA ligase	72245.4	77920.9	93308.9	166326	144846	115914	278185	52199.6	158334	198000	160478	79067.7	370913	174806	121567
sp|P15070|FLIN_ECOLI	P15070	fliN	Flagellar motor switch protein FliN	479442	429493	555985	392528	380036	477902	174019	98729.5	421283	455302	438041	490444	364997	399928	373137
sp|P15286|FLK_ECOLI	P15286	flk	Flagellar regulator flk	10982.5	17428	28599.6	24939.2	45094.1	43003.7	50885.5	8765.2	25245.2	41257	22038.1	24255.2	70627.2	57881.9	32507.6
sp|P15288|PEPD_ECOLI	P15288	pepD	Cytosol non-specific dipeptidase	408544	403779	625437	603624	677748	649910	1618038	304021	561528	1.4365e+06	1.54494e+06	909776	1.22007e+06	905713	871197
sp|P15373|PRLF_ECOLI	P15373	prlF	Antitoxin PrlF	63493.6	52666.3	84882.8	80308.7	116930	108169	63709.1	12644.2	56148.3	74116.5	77844.6	101754	73060.8	78805.1	98120.9
sp|P15639|PUR9_ECOLI	P15639	purH	Bifunctional purine biosynthesis protein PurH	121564	158744	250452	285801	285846	310174	651714	122534	303398	269428	302400	158720	839219	392386	490493
sp|P15640|PUR2_ECOLI	P15640	purD	Phosphoribosylamine--glycine ligase	93863.1	56889.6	203292	149422	223598	217656	172241	61085.1	170523	128291	175906	174079	321168	228213	254682
sp|P16095|SDHL_ECOLI	P16095	sdaA	L-serine dehydratase 1	62312.3	57416	61492.1	81745.5	89690.4	85599.7	131302	53403.6	74338.8	99918.5	80603.5	38432.9	159256	159220	108819
sp|P16456|SELD_ECOLI	P16456	selD	Selenide, water dikinase	342554	473883	1113685	700146	1.23451e+06	1169769	1277948	252315	659515	1.39505e+06	1.63141e+06	1.0835e+06	1.5864e+06	1251323	1.19621e+06
sp|P16659|SYP_ECOLI	P16659	proS	Proline--tRNA ligase	505634	739761	977268	1.26684e+06	1.5275e+06	1285298	2740258	495990	1.167e+06	1.89664e+06	1.9259e+06	1.26313e+06	2.78979e+06	1.84479e+06	1.81583e+06
sp|P16700|CYSP_ECOLI	P16700	cysP	Thiosulfate-binding protein	407197	667201	1.01477e+06	888350	1.3097e+06	1.19808e+06	101377	29103	574441	1.07313e+06	1.59776e+06	1.00346e+06	1.42e+06	1.26533e+06	1.18356e+06
sp|P16703|CYSM_ECOLI	P16703	cysM	Cysteine synthase B	104078	160828	274073	212207	215520	250326	271922	16908.8	234055	260992	321508	250053	493310	286238	293674
sp|P17117|NFSA_ECOLI	P17117	nfsA	Oxygen-insensitive NADPH nitroreductase	15815.4	82176.1	238240	270189	344511	269978	411094	23236.7	190231	346193	366770	282159	694871	461670	373584
sp|P17169|GLMS_ECOLI	P17169	glmS	Glutamine--fructose-6-phosphate aminotransferase [isomerizing]	188286	245259	262641	419189	430762	347211	1.0926e+06	170744	266156	592283	922063	394563	1.08504e+06	740547	564659
sp|P17445|BETB_ECOLI	P17445	betB	Betaine aldehyde dehydrogenase	30353.1	30951.1	71747.9	63647.3	77990.6	30157.1	222245	20787.7	53916.9	40129.2	64870.2	64915.6	14093.4	87450.4	84033.8
sp|P17952|MURC_ECOLI	P17952	murC	UDP-N-acetylmuramate--L-alanine ligase	50117.1	65650.3	67234.1	55863.4	42235.5	124482	276433	38582.9	74566.4	117525	136091	114022	117987	64983.4	98533.9
sp|P17993|UBIG_ECOLI	P17993	ubiG	Ubiquinone biosynthesis O-methyltransferase	20094.8	31568	161980	67005.1	138037	90712.9	217918	4204.78	102490	201825	210998	159903	250386	149443	147686
sp|P18196|MINC_ECOLI	P18196	minC	Septum site-determining protein MinC	14347.2	22116.6	716291	580627	632523	545960	459507	5631.61	395978	496784	620478	650898	107732	789800	451844
sp|P18390|YJJA_ECOLI	P18390	yjjA	Uncharacterized protein YjjA	49990.7	63572.9	104339	107446	126208	125157	75087.6	24199.1	103833	130385	150595	137608	180579	133276	119756
sp|P18843|NADE_ECOLI	P18843	nadE	NH(3)-dependent NAD(+) synthetase	736426	659175	1447345	920847	1.09289e+06	1.0861e+06	1.15421e+06	331160	944832	1.35999e+06	1437491	1.41713e+06	1.15288e+06	1023269	990715
sp|P19926|AGP_ECOLI	P19926	agp	Glucose-1-phosphatase	483213	661849	1.23381e+06	845398	979855	1.03837e+06	495679	110712	527628	1.38688e+06	1.57349e+06	1658474	769542	693968	688364
sp|P20083|PARE_ECOLI	P20083	parE	DNA topoisomerase 4 subunit B	21848.7	38928.3	36142.2	61792.2	63520.7	44992.8	120384	5302.91	59688.1	83797.1	72238.4	35772.5	206381	64710.5	60721
sp|P21151|FADA_ECOLI	P21151	fadA	3-ketoacyl-CoA thiolase FadA	219906	483236	1.22923e+06	1.14911e+06	1.41494e+06	1.39353e+06	177297	13851.3	1.02297e+06	1554616	1.83992e+06	1.41488e+06	152098	79325.6	44925.5
sp|P21165|PEPQ_ECOLI	P21165	pepQ	Xaa-Pro dipeptidase	616320	793558	1.49135e+06	1.36238e+06	1.46232e+06	1.46007e+06	1.814e+06	512805	1.05573e+06	1.57594e+06	2.05471e+06	1.48397e+06	1.97614e+06	1326810	1662957
sp|P21170|SPEA_ECOLI	P21170	speA	Biosynthetic arginine decarboxylase	35466.4	35280.5	45527.5	123058	150206	88425.6	300605	9662.73	79803.4	267364	236898	103523	391597	174993	146723
sp|P21338|RNI_ECOLI	P21338	rna	Ribonuclease I	51494.3	61719.6	136169	98088.3	175644	157317	250641	15353.7	128860	206551	239907	161891	261544	171662	217812
sp|P21367|YCAC_ECOLI	P21367	ycaC	Probable hydrolase YcaC	45440.8	20605.1	55093.6	55777.9	93414.8	94493.4	93335.2	13564.4	23696.5	295902	239124	219954	55754.2	22331.8	21205.4
sp|P21507|SRMB_ECOLI	P21507	srmB	ATP-dependent RNA helicase SrmB	53249.8	116297	209055	181175	253091	232919	482112	111840	267080	267181	260683	307196	389440	200800	275807
sp|P21513|RNE_ECOLI	P21513	rne	Ribonuclease E	160612	205852	327879	432824	569668	481899	846458	84707	279742	779466	812761	438523	1.06995e+06	605710	538447
sp|P21599|KPYK2_ECOLI	P21599	pykA	Pyruvate kinase II	299950	461464	715589	734727	798120	805696	913013	125184	447312	747920	914677	591293	1.35112e+06	923016	812011
sp|P21645|LPXD_ECOLI	P21645	lpxD	UDP-3-O-(3-hydroxymyristoyl)glucosamine N-acyltransferase	95750.1	117037	199687	197602	228375	224353	394999	121011	216425	276568	303767	212571	374463	256598	223568
sp|P21829|YBHA_ECOLI	P21829	ybhA	Pyridoxal phosphate phosphatase YbhA	27343.2	27946.5	69752.6	25125.3	69749.1	52023.9	154759	30218.7	45775.7	62269.4	62870.4	46978.1	78995.3	75536.6	63641.7
sp|P21888|SYC_ECOLI	P21888	cysS	Cysteine--tRNA ligase	232093	260180	424492	363809	423167	396776	1.03366e+06	234962	495411	521800	572308	403386	1.02093e+06	657714	597219
sp|P21889|SYD_ECOLI	P21889	aspS	Aspartate--tRNA ligase	195653	225297	399848	361606	538509	466674	1.30006e+06	143241	560564	1.03927e+06	1.09729e+06	476677	1.43838e+06	799068	819444
sp|P22188|MURE_ECOLI	P22188	murE	UDP-N-acetylmuramoyl-L-alanyl-D-glutamate--2,6-diaminopimelate ligase	55975.3	84165.5	226662	156216	171975	188482	408786	60857.9	189021	323082	371179	281472	298887	221083	230537
sp|P22255|CYSQ_ECOLI	P22255	cysQ	3'(2'),5'-bisphosphate nucleotidase CysQ	86491.9	167217	304443	252630	290189	241139	443098	53100.7	256859	447215	469514	451519	524092	228974	297293
sp|P22256|GABT_ECOLI	P22256	gabT	4-aminobutyrate aminotransferase GabT	120473	147520	354709	354522	423848	430549	425558	66071.1	142209	1.29398e+06	1.39742e+06	1.0151e+06	141434	161638	150650
sp|P22259|PCKA_ECOLI	P22259	pckA	Phosphoenolpyruvate carboxykinase (ATP)	793850	1.5195e+06	2.83179e+06	2901835	3.5802e+06	2.94384e+06	3.22963e+06	550378	2.63565e+06	3.44844e+06	3877990	2400223	4.92185e+06	3.97123e+06	3.47627e+06
sp|P22333|ADD_ECOLI	P22333	add	Adenosine deaminase	96815.1	173948	306638	239390	299486	309315	333238	41758	262719	332692	206420	312359	449622	189332	285679
sp|P22523|MUKB_ECOLI	P22523	mukB	Chromosome partition protein MukB	101217	99818.8	104141	274020	251754	92215.5	489769	22736.1	123844	431441	412281	248444	871313	397816	266721
sp|P22939|ISPA_ECOLI	P22939	ispA	Farnesyl diphosphate synthase	34371.3	93646.3	208694	165219	235405	221507	204879	39425.7	205586	262994	291152	220626	326998	226745	247312
sp|P23003|TRMA_ECOLI	P23003	trmA	tRNA/tmRNA (uracil-C(5))-methyltransferase	12671.1	32553.5	122570	162996	168280	149078	370809	20316	126824	238497	273442	158648	400152	88056.7	260097
sp|P23331|KITH_ECOLI	P23331	tdk	Thymidine kinase	20982.1	41306.1	77357.4	71025.8	86721.1	98791.9	113206	36722.4	118939	97481.8	81131.6	121851	97390.9	96240.8	127648
sp|P23538|PPSA_ECOLI	P23538	ppsA	Phosphoenolpyruvate synthase	300965	444489	426162	1.20023e+06	1.14573e+06	941980	391009	22928.3	561281	1.49124e+06	1.60548e+06	789711	3.06848e+06	1.90196e+06	1.67681e+06
sp|P23721|SERC_ECOLI	P23721	serC	Phosphoserine aminotransferase	268849	390957	905255	607989	871250	805513	1.04992e+06	215492	585843	1.31999e+06	1.57991e+06	1.14589e+06	1.1581e+06	791959	740193
sp|P23827|ECOT_ECOLI	P23827	eco	Ecotin	307091	483660	1.41359e+06	1.08501e+06	1652171	1.63941e+06	618872	80169.3	985294	1.22791e+06	1471452	1.27614e+06	1.79589e+06	1.76014e+06	1650575
sp|P23836|PHOP_ECOLI	P23836	phoP	Transcriptional regulatory protein PhoP	236480	310938	503935	451669	518728	484450	547579	135144	438491	734947	693433	566455	656843	551907	566268
sp|P23839|YICC_ECOLI	P23839	yicC	UPF0701 protein YicC	118650	113130	229412	322193	358644	355691	674881	141880	196140	392681	358431	313813	524309	359867	343639
sp|P23843|OPPA_ECOLI	P23843	oppA	Periplasmic oligopeptide-binding protein	577203	1.04082e+06	2.33247e+06	3.19284e+06	4092704	4.14474e+06	921211	64260.6	1.19475e+06	2.9745e+06	4071124	3.08036e+06	2925102	2542381	2.27473e+06
sp|P23847|DPPA_ECOLI	P23847	dppA	Dipeptide-binding protein	471365	571854	1.30059e+06	1.20878e+06	1.37055e+06	1.51003e+06	828887	167676	666313	1.87568e+06	2697335	2.21387e+06	844527	816260	806713
sp|P23865|PRC_ECOLI	P23865	prc	Tail-specific protease	61996.9	212773	404728	238743	262482	223263	376098	43933.4	167525	330161	348807	341362	377583	258514	254624
sp|P23869|PPIB_ECOLI	P23869	ppiB	Peptidyl-prolyl cis-trans isomerase B	99303.1	188800	436831	475892	720923	562283	866480	85759.7	406863	940697	991195	649887	1.30948e+06	763762	766224
sp|P23882|FMT_ECOLI	P23882	fmt	Methionyl-tRNA formyltransferase	205468	345283	662982	534463	635232	672629	860338	140836	498373	696124	441206	621846	859313	707545	691115
sp|P23893|GSA_ECOLI	P23893	hemL	Glutamate-1-semialdehyde 2,1-aminomutase	435889	526841	719074	795232	830982	820622	1446010	313769	835665	1.03425e+06	1.01073e+06	800976	1.64886e+06	1.19624e+06	1.10126e+06
sp|P23908|ARGE_ECOLI	P23908	argE	Acetylornithine deacetylase	30958.4	41602.7	82466.9	77571.9	106003	80608	173426	18940.3	77623.1	160205	145656	104485	186102	101857	103636
sp|P23917|MAK_ECOLI	P23917	mak	Fructokinase	6506.86	39613.4	106989	92396.1	122562	117320	118628	9009.82	36608.9	137022	170728	145669	200710	65373.9	59416.9
sp|P24171|DCP_ECOLI	P24171	dcp	Dipeptidyl carboxypeptidase	54183.2	83957.4	90215.8	119049	106541	164311	211272	7077.86	124406	234349	285670	144490	252292	162543	161651
sp|P24182|ACCC_ECOLI	P24182	accC	Biotin carboxylase	454682	576393	838887	803267	1.03281e+06	851851	2.26278e+06	383146	953371	1.42616e+06	1.47063e+06	906910	2271438	1.25044e+06	1.26025e+06
sp|P24186|FOLD_ECOLI	P24186	folD	Bifunctional protein FolD	80345.2	140185	276443	226065	297442	269657	551581	175869	237088	298210	339219	269900	668489	353478	354936
sp|P24188|TRHO_ECOLI	P24188	trhO	tRNA uridine(34) hydroxylase	15140.2	50643.5	119660	40980.5	80094.3	57432.4	163385	33287.4	119991	54085.1	49617.5	27649.1	242136	103340	145707
sp|P24203|YJIA_ECOLI	P24203	yjiA	Zinc chaperone YjiA	74610.9	85543.8	55772.6	116546	59489.6	54761	189634	59453	62190.9	192293	168303	53989	192058	153941	54954.9
sp|P24215|UXUA_ECOLI	P24215	uxuA	Mannonate dehydratase	508902	860440	1.33881e+06	1077115	606913	1.17928e+06	704953	262897	985769	699548	640431	1.12664e+06	806940	730522	1.20811e+06
sp|P24216|FLID_ECOLI	P24216	fliD	Flagellar hook-associated protein 2	83593.6	124417	188177	490384	184726	162624	54781.9	6259.09	116534	175336	183986	155845	273072	144410	183578
sp|P24232|HMP_ECOLI	P24232	hmp	Flavohemoprotein	262079	357590	535867	369016	450529	351146	217411	49903.9	333045	298335	342811	368713	455254	340095	326228
sp|P25397|TEHB_ECOLI	P25397	tehB	Tellurite methyltransferase	125565	156781	190801	70629.2	108497	159616	56788.8	32659.2	86732	146078	140038	211003	145386	122569	108293
sp|P25437|FRMA_ECOLI	P25437	frmA	S-(hydroxymethyl)glutathione dehydrogenase	72665.5	91015.1	127079	110976	137247	120782	195226	39145.8	161678	132577	79567.3	101793	248921	185699	161385
sp|P25516|ACNA_ECOLI	P25516	acnA	Aconitate hydratase A	78520.5	70577.6	168155	296659	321731	279355	309360	51392.9	197111	519629	667277	378716	236196	247396	214130
sp|P25519|HFLX_ECOLI	P25519	hflX	GTPase HflX	17872.4	20359.3	9346.69	38926.8	56107.7	25045.7	118393	9196.33	22691.3	85301.5	98409.7	8533.54	125446	58729.3	48166.6
sp|P25536|NTPPA_ECOLI	P25536	yhdE	dTTP/UTP pyrophosphatase	37862.4	75794	174668	92103.4	160318	136767	295547	58455.6	186131	270877	232186	249937	214627	131177	208181
sp|P25539|RIBD_ECOLI	P25539	ribD	Riboflavin biosynthesis protein RibD	110730	80554.6	172128	173791	198467	140381	299770	47483	118611	215979	210152	148107	322716	100579	145088
sp|P25553|ALDA_ECOLI	P25553	aldA	Lactaldehyde dehydrogenase	1.41091e+06	1.37831e+06	2234572	4.0075e+06	4.43655e+06	3.91221e+06	2926085	294914	1732505	6.41889e+06	7.50308e+06	3800030	3996517	2.65189e+06	2252560
sp|P25745|MNMA_ECOLI	P25745	mnmA	tRNA-specific 2-thiouridylase MnmA	78912.4	74516.9	148457	110616	163838	147632	290364	87521	154617	193145	215692	161843	204223	199010	192517
sp|P25748|GALS_ECOLI	P25748	galS	HTH-type transcriptional regulator GalS	39188.6	40074.3	68445.6	33734.1	48454.6	55302.1	27036.8	13215.9	35990.2	65667.2	88314.5	113253	22803.9	37943.5	44085.1
sp|P25894|LOIP_ECOLI	P25894	loiP	Metalloprotease LoiP	141104	173032	373681	338344	331893	381110	305861	69964.2	177217	465896	446563	478896	345755	313591	258746
sp|P25906|PDXI_ECOLI	P25906	pdxI	Pyridoxine 4-dehydrogenase	22587.2	30933.5	79378.2	59007.7	81317.5	65147.2	71899.7	11814.2	41606.3	253712	358382	153735	104465	59750.4	55753.1
sp|P26365|AMIB_ECOLI	P26365	amiB	N-acetylmuramoyl-L-alanine amidase AmiB	22496.1	24396	57655.2	23129.8	71878.1	45320.3	92649.4	10954.5	26603.7	65230.8	79342.3	53338.4	98257.3	30899	49040.9
sp|P26616|MAO1_ECOLI	P26616	maeA	NAD-dependent malic enzyme	183126	261198	278246	419683	395521	355007	357399	56532.1	237481	489765	501632	245402	848626	548422	428110
sp|P26646|ACUI_ECOLI	P26646	acuI	Probable acrylyl-CoA reductase AcuI	28811	82014.9	184581	126831	170213	162473	259881	8555.01	100982	261559	339715	232427	287849	238162	219966
sp|P27248|GCST_ECOLI	P27248	gcvT	Aminomethyltransferase	876048	989041	1.91445e+06	1.44256e+06	1.69454e+06	1.59966e+06	884016	185418	1292280	1.84235e+06	1.96908e+06	1.69555e+06	1861776	1.31862e+06	1.43432e+06
sp|P27298|OPDA_ECOLI	P27298	prlC	Oligopeptidase A	166960	242424	437726	383806	479225	389943	1.37318e+06	232827	543356	845342	772039	478327	1.0626e+06	636418	554660
sp|P27302|TKT1_ECOLI	P27302	tktA	Transketolase 1	783850	681204	773438	1472699	1399157	1.01365e+06	2.04384e+06	364322	850416	1.67457e+06	1.48084e+06	905411	2590627	1.20452e+06	1.42116e+06
sp|P27306|STHA_ECOLI	P27306	sthA	Soluble pyridine nucleotide transhydrogenase	118093	174963	240683	553217	650138	511379	498627	93264.9	258683	717500	741840	491653	639528	498580	483617
sp|P27434|RODZ_ECOLI	P27434	rodZ	Cytoskeleton protein RodZ	23320.9	26245.5	54645.6	49479.4	95892.8	11159.3	161665	13347.3	46697	171181	183959	65228.1	151017	94091.2	56098.5
sp|P27550|ACSA_ECOLI	P27550	acs	Acetyl-coenzyme A synthetase	99710.7	82023.8	50373.6	583068	686316	582210	511205	53247.7	87662.6	712088	958906	431966	208393	313942	160549
sp|P27829|WECC_ECOLI	P27829	wecC	UDP-N-acetyl-D-mannosamine dehydrogenase	80351.8	37511.2	83091.1	198863	109552	113406	260135	29744.2	110933	142586	186561	113899	310166	218662	178142
sp|P27838|CYAY_ECOLI	P27838	cyaY	Iron-sulfur cluster assembly protein CyaY	56237.6	77566.8	185100	168440	243280	228703	237415	45306.2	158320	198344	252898	231957	336627	264502	243789
sp|P28904|TREC_ECOLI	P28904	treC	Trehalose-6-phosphate hydrolase	709757	691282	1.18289e+06	1.06019e+06	1.10098e+06	1.02915e+06	906419	92985.8	1232859	991932	1.239e+06	775089	2394442	1539655	1.44868e+06
sp|P29012|ALR2_ECOLI	P29012	dadX	Alanine racemase, catabolic	212260	342375	602990	368340	442694	463220	206821	46894.3	380319	701818	787035	643324	431348	317805	368951
sp|P29131|FTSN_ECOLI	P29131	ftsN	Cell division protein FtsN	24195.4	48139.6	103692	65775.5	114369	113398	91054.3	7546.89	85346.2	87462	89594.9	98106.9	66578.3	54786.8	112303
sp|P29208|MENC_ECOLI	P29208	menC	o-succinylbenzoate synthase	26662.8	30393	43641.9	23080.1	36577.5	39609	140731	28563.7	83441.4	34384.8	36980.5	27950.4	54426.8	55503.3	34228
sp|P29217|YCEH_ECOLI	P29217	yceH	UPF0502 protein YceH	98407.9	126310	186728	152438	190720	187240	198974	46745	150233	177295	149811	187432	195382	182846	180961
sp|P29680|DCUP_ECOLI	P29680	hemE	Uroporphyrinogen decarboxylase	37115.7	44745.4	46041.9	70343.2	48972.7	31316.8	270768	21307.3	43711.1	197870	205338	92016.5	187819	255779	60788.2
sp|P29744|FLGL_ECOLI	P29744	flgL	Flagellar hook-associated protein 3	194185	191578	363104	567532	473969	538503	163066	9957.97	259837	352085	363976	393099	418809	387290	375459
sp|P29745|PEPT_ECOLI	P29745	pepT	Peptidase T	145155	153489	212454	207245	235636	254247	232081	33751.3	201522	343906	420371	377394	372512	286460	259449
sp|P30011|NADC_ECOLI	P30011	nadC	Nicotinate-nucleotide pyrophosphorylase [carboxylating]	35049.2	40963.4	167436	135700	131181	131121	257591	31256.9	59541.6	192144	159610	113259	153575	163493	80379.2
sp|P30014|RNT_ECOLI	P30014	rnt	Ribonuclease T	14953.3	28833.7	46907.1	38328.7	56839.5	42855.4	274751	26597.4	51736.2	197089	63003.2	49947.6	139330	55819.8	57047.1
sp|P30128|GREB_ECOLI	P30128	greB	Transcription elongation factor GreB	36333.7	39889.2	95491.2	75912.4	64279.8	95869.6	48554.1	17900.4	59819.7	41313.4	49537.6	94173.9	102927	92399.3	125246
sp|P30177|YBIB_ECOLI	P30177	ybiB	Uncharacterized protein YbiB	319580	401965	682889	551665	311416	352209	293803	84403.2	181700	812774	560087	345000	803058	378067	291349
sp|P30744|SDHM_ECOLI	P30744	sdaB	L-serine dehydratase 2	237866	259347	398560	189549	331888	151050	767455	233834	426377	250624	350488	214548	589673	456435	384851
sp|P30749|MOAE_ECOLI	P30749	moaE	Molybdopterin synthase catalytic subunit	43317.8	64529.6	96016.6	80382.6	93442.3	91701.1	79992.2	33514.7	83282.1	101354	170816	120039	62699.7	77155.1	88224.1
sp|P30850|RNB_ECOLI	P30850	rnb	Exoribonuclease 2	195525	317621	549930	522847	704099	592065	1.15756e+06	192085	546391	955464	990223	593161	1.09261e+06	786458	831779
sp|P30859|ARTI_ECOLI	P30859	artI	Putative ABC transporter arginine-binding protein 2	210458	364769	679014	549248	745908	804272	305073	83056.4	461466	948462	1112493	965565	782285	578263	687848
sp|P30863|DKGB_ECOLI	P30863	dkgB	2,5-diketo-D-gluconic acid reductase B	43776.3	61660.1	136607	52273.4	52578.7	89146.6	95641.8	27616.7	129467	114992	101163	134770	52707.5	109149	128641
sp|P31057|PANB_ECOLI	P31057	panB	3-methyl-2-oxobutanoate hydroxymethyltransferase	101166	121331	93976.7	161804	210912	180153	166238	53427.1	106066	172975	157897	164745	205198	88800.8	187651
sp|P31063|YEDD_ECOLI	P31063	yedD	Uncharacterized lipoprotein YedD	5988.52	34555.3	137092	47986.1	86609.2	118898	118985	10515.3	86075.1	129284	148576	122827	158166	82566.2	89865.6
sp|P31068|FLIH_ECOLI	P31068	fliH	Flagellar assembly protein FliH	121318	133428	328319	109115	205763	224327	150175	22225.6	117778	317114	311411	280408	244111	168724	177770
sp|P31120|GLMM_ECOLI	P31120	glmM	Phosphoglucosamine mutase	124930	207733	300300	437863	508296	441199	900374	109881	310188	788294	899887	470510	1.14725e+06	655981	589118
sp|P31142|THTM_ECOLI	P31142	sseA	3-mercaptopyruvate sulfurtransferase	37575.9	88277.3	165488	169305	224538	323068	324649	35606.1	219406	200125	197990	81925.3	320909	154488	321727
sp|P31455|YIDR_ECOLI	P31455	yidR	Uncharacterized protein YidR	48855.7	71322.3	84789.1	126421	138644	156781	173106	39777.8	137398	155086	99685.6	132866	194517	143153	137785
sp|P31475|YIEP_ECOLI	P31475	yieP	Uncharacterized HTH-type transcriptional regulator YieP	50217.8	35589.5	75405.2	57788.5	49967.3	95760	146517	24468.1	54921.3	78342.5	91536.4	82567.9	187224	101089	120922
sp|P31658|HCHA_ECOLI	P31658	hchA	Protein/nucleic acid deglycase 1	258973	378791	724086	431050	625142	596006	445972	117712	252472	882083	1.0452e+06	1.22729e+06	386143	522562	391279
sp|P31663|PANC_ECOLI	P31663	panC	Pantothenate synthetase	27080.4	50277.4	117646	100794	149374	80951	243796	19593	81790.3	195155	260147	155946	337783	135782	162350
sp|P31802|NARP_ECOLI	P31802	narP	Nitrate/nitrite response regulator protein NarP	32046.5	102110	233934	184827	238557	223544	249774	36376.6	161822	198150	223106	140267	455353	298690	329220
sp|P31808|YCIK_ECOLI	P31808	yciK	Uncharacterized oxidoreductase YciK	104311	122077	199351	188050	214770	223755	228210	15818.3	161987	130296	255405	174884	282986	160683	277971
sp|P31979|NUOF_ECOLI	P31979	nuoF	NADH-quinone oxidoreductase subunit F	570030	791894	136017	1285066	1.15553e+06	1.53826e+06	2382607	11824.4	1.3057e+06	1.43851e+06	2448202	866231	2135379	1.29623e+06	318213
sp|P32157|YIIM_ECOLI	P32157	yiiM	Protein YiiM	98195.9	138824	200995	231501	248763	261387	159287	75929	139742	355446	308283	281999	244321	222863	263217
sp|P32160|YIIQ_ECOLI	P32160	yiiQ	Uncharacterized protein YiiQ	15506.1	42874.3	95637.1	82393.7	92253.8	127159	107700	51551	87708	63949.5	66833.9	82754.9	131490	115563	139718
sp|P32162|YIIS_ECOLI	P32162	yiiS	UPF0381 protein YiiS	26335.2	46977.5	127020	84817.1	140178	124767	78650.7	15954.3	73175.9	240106	249084	246511	129063	139222	109799
sp|P32176|FDOG_ECOLI	P32176	fdoG	Formate dehydrogenase-O major subunit	27896.4	19949.2	66003.8	51665.2	41055.5	16596.5	319349	18479.8	65960.9	97677.8	79483.1	69172	103844	37725	83855.7
sp|P32662|GPH_ECOLI	P32662	gph	Phosphoglycolate phosphatase	33782.3	64405.5	193355	124621	204747	185467	231051	34324.5	155303	206659	248486	193493	227143	203613	215496
sp|P32695|DUSA_ECOLI	P32695	dusA	tRNA-dihydrouridine(20/20a) synthase	94273	131348	310010	211663	293328	275553	505158	86250.6	274546	216398	282573	256008	423921	336524	307662
sp|P33030|YEIR_ECOLI	P33030	yeiR	Zinc chaperone YeiR	64236.2	86317.8	135503	125562	128174	114917	214931	53714	110622	165160	141006	137703	37534.3	141545	144847
sp|P33136|OPGG_ECOLI	P33136	mdoG	Glucans biosynthesis protein G	246928	344932	721416	455250	741920	842858	681295	124270	370159	466234	829598	600831	1.19804e+06	936889	801941
sp|P33195|GCSP_ECOLI	P33195	gcvP	Glycine dehydrogenase (decarboxylating)	289291	378650	546340	711320	922649	693955	831949	6626.03	441827	1.48454e+06	1.80585e+06	958769	1.76488e+06	794627	895638
sp|P33232|LLDD_ECOLI	P33232	lldD	L-lactate dehydrogenase	1344434	1.63778e+06	1.89228e+06	1.76428e+06	394891	1.54523e+06	2.82197e+06	960382	1.64005e+06	2.44079e+06	875023	2.22902e+06	2.05376e+06	428248	1664623
sp|P33355|YEHS_ECOLI	P33355	yehS	Uncharacterized protein YehS	28708.3	29169.2	82294.4	22342.6	62667.5	70438.1	33916.7	14467.9	34652.8	79156.4	34296.6	69052.5	22778.1	30482.1	69650.8
sp|P33363|BGLX_ECOLI	P33363	bglX	Periplasmic beta-glucosidase	170273	165781	535386	380464	381641	447484	329561	33115.4	364598	485140	538254	560505	563214	386891	470414
sp|P33599|NUOCD_ECOLI	P33599	nuoC	NADH-quinone oxidoreductase subunit C/D	303633	347580	399970	843784	831820	672829	833062	125389	580610	1262393	1.23157e+06	783680	1620077	1.0191e+06	1.02366e+06
sp|P33602|NUOG_ECOLI	P33602	nuoG	NADH-quinone oxidoreductase subunit G	408840	430669	681133	658596	899463	873104	1.02626e+06	165435	742407	1.25377e+06	1.47566e+06	979803	1751094	901483	847035
sp|P33643|RLUD_ECOLI	P33643	rluD	Ribosomal large subunit pseudouridine synthase D	25295.7	33749.5	39442.8	60289.4	50000.4	26344.8	143146	27770.7	42984.1	89791.3	116299	65241.3	127356	45943.6	62506.8
sp|P33920|NDPA_ECOLI	P33920	yejK	Nucleoid-associated protein YejK	14004.4	50800.8	62557.6	96673.5	135079	109020	221982	22115.6	64275.5	166728	196659	86840.5	339135	179112	174965
sp|P34209|YDCF_ECOLI	P34209	ydcF	Protein YdcF	7945.54	31537.7	71422.1	37247.2	70597.8	56155	56580.1	6963.49	77457.1	84657.6	99426.3	75151.6	113802	95220.4	77464.6
sp|P35340|AHPF_ECOLI	P35340	ahpF	Alkyl hydroperoxide reductase subunit F	264705	393405	709330	495262	569542	516215	1.5665e+06	321608	602806	1.14734e+06	1.12423e+06	791545	1.28653e+06	604772	669365
sp|P36680|ZAPD_ECOLI	P36680	zapD	Cell division protein ZapD	40627.9	61636	104646	79192.1	90951.8	91041.7	235267	54238.8	114707	105065	142154	111562	200487	141383	116384
sp|P36683|ACNB_ECOLI	P36683	acnB	Aconitate hydratase B	1896347	2284799	3.74716e+06	7004773	8266519	7.15229e+06	8041454	1.17402e+06	3.11748e+06	10088916	11923553	6.48949e+06	8.0484e+06	5586625	5.30739e+06
sp|P36767|RDGC_ECOLI	P36767	rdgC	Recombination-associated protein RdgC	71690.2	83490.1	102622	144102	138802	123399	235322	47419.9	125512	136298	117210	114796	174884	173158	146362
sp|P36938|PGM_ECOLI	P36938	pgm	Phosphoglucomutase	126881	151065	250621	235564	291913	263156	458500	58166.1	212833	438964	419061	286086	443173	294734	303661
sp|P36979|RLMN_ECOLI	P36979	rlmN	Dual-specificity RNA methyltransferase RlmN	72214.8	37605.2	125732	152872	297525	178800	366957	47161.7	173121	177697	179613	279643	370750	406283	257272
sp|P36999|RLMA_ECOLI	P36999	rlmA	23S rRNA (guanine(745)-N(1))-methyltransferase	8953.86	15071.6	33780.8	23165.7	34542.5	32071.2	114419	15424.6	33268.6	45293.5	47987.3	31517.9	89011.1	40458.1	39522.3
sp|P37095|PEPB_ECOLI	P37095	pepB	Peptidase B	355869	603819	841849	927004	1.17142e+06	1.11181e+06	778106	159687	580728	842509	1.09454e+06	846498	2.06445e+06	1.28038e+06	1.35365e+06
sp|P37188|PTKB_ECOLI	P37188	gatB	PTS system galactitol-specific EIIB component	80596.4	268808	804007	503590	765271	537827	386512	4189.75	365398	1.9458e+06	2.52181e+06	1.17008e+06	1.23564e+06	703909	514537
sp|P37329|MODA_ECOLI	P37329	modA	Molybdate-binding protein ModA	126498	281072	369959	472442	705672	621293	141614	26330	415600	677773	817160	559978	781433	653641	584782
sp|P37330|MASZ_ECOLI	P37330	glcB	Malate synthase G	975015	1.00654e+06	1.80151e+06	2.50578e+06	3.14455e+06	2758594	797374	99776.9	973743	6127213	4.70663e+06	3.74716e+06	1.06894e+06	1251056	918364
sp|P37349|DHAM_ECOLI	P37349	dhaM	PEP-dependent dihydroxyacetone kinase, phosphoryl donor subunit DhaM	75263.7	100293	134230	131916	227320	133874	963154	114584	197896	436514	477784	214515	504569	274168	290401
sp|P37440|UCPA_ECOLI	P37440	ucpA	Oxidoreductase UcpA	326419	400283	925668	583856	960245	983294	469120	125873	560886	692856	790620	846312	668723	611831	779702
sp|P37613|PANZ_ECOLI	P37613	panZ	PanD regulatory factor	21546.4	32181.1	63245.6	42859.3	65381.6	52876.4	111355	14194.6	65878.6	88610.8	86077.2	61317.8	66348.8	72999.1	70627.6
sp|P37647|KDGK_ECOLI	P37647	kdgK	2-dehydro-3-deoxygluconokinase	52016.8	158352	407090	230136	424470	379228	621438	68174.9	313006	467803	586508	415002	761041	406949	424598
sp|P37648|YHJJ_ECOLI	P37648	yhjJ	Protein YhjJ	115079	112966	200187	146747	135380	138673	302949	58446.8	258060	212766	266386	181211	304996	171830	201096
sp|P37666|GHRB_ECOLI	P37666	ghrB	Glyoxylate/hydroxypyruvate reductase B	82619.5	77869.6	148550	118420	170431	159968	307139	51303.4	130758	194067	228458	155580	272034	151616	179002
sp|P37689|GPMI_ECOLI	P37689	gpmI	2,3-bisphosphoglycerate-independent phosphoglycerate mutase	257881	381076	745471	491730	705758	560401	1380259	277161	805600	912946	965859	743721	1.07303e+06	892373	729601
sp|P37744|RMLA1_ECOLI	P37744	rfbA	Glucose-1-phosphate thymidylyltransferase 1	419141	384747	565692	490058	539320	517997	1.01815e+06	331909	695376	685846	653383	516442	1.02568e+06	709711	808220
sp|P37745|RMLC_ECOLI	P37745	rfbC	dTDP-4-dehydrorhamnose 3,5-epimerase	76801.7	140788	311992	181517	282767	260268	489726	87634.2	277991	327568	368357	259881	491541	330834	365535
sp|P37747|GLF_ECOLI	P37747	glf	UDP-galactopyranose mutase	179845	208475	324266	259216	288148	302165	549476	148590	343548	403541	333745	314068	681958	379445	392199
sp|P37749|WBBI_ECOLI	P37749	wbbI	Beta-1,6-galactofuranosyltransferase WbbI	97616.8	52936	64332.8	83221.8	69909	93339.1	170058	62544.7	103906	96104.4	79607.6	100576	199316	139620	141215
sp|P37759|RMLB1_ECOLI	P37759	rfbB	dTDP-glucose 4,6-dehydratase 1	151849	156763	213562	359066	475528	354840	926757	120732	356008	750535	739872	584662	985530	610347	783116
sp|P37760|RMLD_ECOLI	P37760	rfbD	dTDP-4-dehydrorhamnose reductase	36129.2	95670.9	33543.1	43574	33761.6	31515.3	242387	69197.8	164264	62655.8	58904.4	125809	64866.5	42237.2	138852
sp|P37773|MPL_ECOLI	P37773	mpl	UDP-N-acetylmuramate--L-alanyl-gamma-D-glutamyl-meso-2,6-diaminoheptandioate ligase	61647.4	78826	49757.7	113645	86256.9	120914	209406	40981	110055	130700	155757	114810	224150	93480.2	156776
sp|P37902|GLTI_ECOLI	P37902	gltI	Glutamate/aspartate import solute-binding protein	267529	524584	963571	1.31807e+06	1.64364e+06	1.59947e+06	351647	90203.7	432914	1.04833e+06	1.37846e+06	1.29129e+06	771458	834752	803128
sp|P37903|USPF_ECOLI	P37903	uspF	Universal stress protein F	25948.5	70331.9	170545	134953	235858	206250	135653	7029.62	87606.5	219924	277168	224955	294480	214779	212556
sp|P38489|NFSB_ECOLI	P38489	nfsB	Oxygen-insensitive NAD(P)H nitroreductase	651294	744005	1.2386e+06	1.04896e+06	1.31265e+06	1.20411e+06	1.13519e+06	330971	1.12469e+06	1234842	1248048	1.33326e+06	1.35127e+06	1.12733e+06	1.24852e+06
sp|P38521|YGGL_ECOLI	P38521	yggL	Uncharacterized protein YggL	56372.6	123609	313623	269989	374137	351202	367133	75511.1	317819	436062	488931	336938	605856	518974	439405
sp|P39099|DEGQ_ECOLI	P39099	degQ	Periplasmic pH-dependent serine endoprotease DegQ	78069.8	116537	346894	203242	292301	331908	288762	49048.7	172765	485992	558370	421595	382175	317329	284893
sp|P39160|UXUB_ECOLI	P39160	uxuB	D-mannonate oxidoreductase	171737	203557	387797	280814	426208	409314	274432	62578.2	266545	316307	375176	272578	411483	314667	310112
sp|P39172|ZNUA_ECOLI	P39172	znuA	High-affinity zinc uptake system protein ZnuA	115340	143663	118894	112732	110089	112096	36976.3	17591.9	177835	144403	184444	140836	196003	107145	231265
sp|P39173|YEAD_ECOLI	P39173	yeaD	Putative glucose-6-phosphate 1-epimerase	73587.1	189214	483332	352538	515263	432785	449694	45229.6	362571	776708	989988	602134	774352	603429	552688
sp|P39180|AG43_ECOLI	P39180	flu	Antigen 43	448925	298537	675120	495168	916970	829002	426997	52290.9	342294	430326	364201	288134	8149094	9124197	8267684
sp|P39199|PRMB_ECOLI	P39199	prmB	50S ribosomal protein L3 glutamine methyltransferase	90182.3	53876.7	89357.9	116774	185414	194641	292864	85745.7	76882	182826	154370	136331	261437	202307	183627
sp|P39265|ALSB_ECOLI	P39265	alsB	D-allose-binding periplasmic protein	141459	205351	280314	278769	279277	273611	57121.7	54070	224075	229073	239455	308787	220871	238724	211371
sp|P39286|RSGA_ECOLI	P39286	rsgA	Small ribosomal subunit biogenesis GTPase RsgA	16233.5	45059.7	64926.8	63461.6	88016.4	83480.8	143921	46825	72917.7	60329.5	65108.4	45973.8	80935.5	48396	57481.5
sp|P39315|QOR2_ECOLI	P39315	qorB	Quinone oxidoreductase 2	29020.3	67089.8	108497	56203.6	125094	115254	104140	23583.3	68630.9	102171	142482	123841	101718	81956.9	65535.9
sp|P39325|YTFQ_ECOLI	P39325	ytfQ	Galactofuranose-binding protein YtfQ	11589.6	70676.6	160872	153833	241212	224862	82144.5	4094.62	62844.4	395720	558442	384636	44749.3	81456.4	92559
sp|P39337|YJGM_ECOLI	P39337	yjgM	Uncharacterized N-acetyltransferase YjgM	40572.8	16936	77818.2	25215.4	81278.1	52082.1	51772.3	4305.14	113576	100514	20054.1	42129.3	86356.1	81550.9	23753.1
sp|P39353|YJHC_ECOLI	P39353	yjhC	Uncharacterized oxidoreductase YjhC	46215.9	41247.4	45038.9	66424.4	21332.9	61360	58260.7	12267.8	13612	104245	213899	125060	122973	5661.08	5520.23
sp|P39406|RSMC_ECOLI	P39406	rsmC	Ribosomal RNA small subunit methyltransferase C	168688	291387	528078	425483	533720	526365	811256	154921	497441	528885	529197	486829	740970	559631	556642
sp|P39411|NCPP_ECOLI	P39411	yjjX	Inosine/xanthosine triphosphatase	86008.4	92934.3	88631.9	127059	143543	60851.5	164792	48130.9	155009	133975	122182	63310	265873	122342	70025.6
sp|P39831|YDFG_ECOLI	P39831	ydfG	NADP-dependent 3-hydroxy acid dehydrogenase YdfG	224842	338585	623759	440768	598698	555094	677527	17166.9	482383	698875	697579	639548	852620	539858	619829
sp|P40191|PDXK_ECOLI	P40191	pdxK	Pyridoxine/pyridoxal/pyridoxamine kinase	82106.2	132967	280176	168973	2.09707e+06	271899	164454	44882.8	169352	246058	300260	277224	213693	256644	242462
sp|P40874|MTOX_ECOLI	P40874	solA	N-methyl-L-tryptophan oxidase	80863.6	62843.3	206921	144322	157259	150917	251496	39785.4	220779	314399	202079	145353	333658	199488	115296
sp|P41409|RIHA_ECOLI	P41409	rihA	Pyrimidine-specific ribonucleoside hydrolase RihA	71747.4	112411	190053	238822	279772	258374	203691	30696.9	121960	243164	260027	216492	315855	217915	205472
sp|P42616|YQJC_ECOLI	P42616	yqjC	Protein YqjC	13565.8	13211.9	33528.7	32037.8	51390.2	40527.1	23455.4	4995.62	33253.9	44722.7	54108.2	56962.8	44329.7	38468.8	53825.2
sp|P42620|YQJG_ECOLI	P42620	yqjG	Glutathionyl-hydroquinone reductase YqjG	61878.3	85654.6	161814	62487.6	88488.4	114592	162191	31269.3	94703.5	196061	225013	219057	64368	81575.2	119833
sp|P42641|OBG_ECOLI	P42641	obgE	GTPase ObgE/CgtA	74304.6	72498.6	133273	87877.1	123280	125003	273075	70197.7	138258	150184	149202	143599	249749	159402	168058
sp|P43672|UUP_ECOLI	P43672	uup	ATP-binding protein Uup	35976	17884.2	36813.2	77948.9	45337.4	30856.6	204250	32926.2	40636	67183.6	41781.4	14361.1	218265	58047.8	8571.2
sp|P45425|NANK_ECOLI	P45425	nanK	N-acetylmannosamine kinase	99945.6	132339	186970	216771	255768	226630	216828	19519.5	311255	428344	418968	451663	497724	275365	219581
sp|P45464|LPOA_ECOLI	P45464	lpoA	Penicillin-binding protein activator LpoA	146622	144458	477679	210145	360644	885423	429938	33431.4	211601	262872	298536	396073	188599	122865	206870
sp|P45523|FKBA_ECOLI	P45523	fkpA	FKBP-type peptidyl-prolyl cis-trans isomerase FkpA	1139222	2.05174e+06	3771177	2.9989e+06	3682650	3.65812e+06	2.72426e+06	710465	3.09756e+06	3.07326e+06	2852473	3220276	3901230	3517470	3.6106e+06
sp|P45577|PROQ_ECOLI	P45577	proQ	RNA chaperone ProQ	270524	441376	818693	643026	949774	1053332	1.52562e+06	276444	841982	1.18039e+06	1128119	869843	1.41435e+06	1.01881e+06	1.16809e+06
sp|P45578|LUXS_ECOLI	P45578	luxS	S-ribosylhomocysteine lyase	337024	495241	1.07014e+06	841632	1208634	1.11018e+06	1.06327e+06	248262	699802	1.50348e+06	1.63286e+06	1.49477e+06	1.38557e+06	1.07213e+06	1.11801e+06
sp|P45748|TSAC_ECOLI	P45748	tsaC	Threonylcarbamoyl-AMP synthase	78336.9	106054	203912	152854	196369	184200	198710	43715.3	188495	255900	249967	221976	272780	212853	192284
sp|P45799|NUDE_ECOLI	P45799	nudE	ADP compounds hydrolase NudE	41112.8	38309.4	98725.4	83219.1	100036	104488	192573	36191.2	84452.5	154850	173731	128363	97191.6	121180	108029
sp|P45955|CPOB_ECOLI	P45955	cpoB	Cell division coordinator CpoB	75263.7	128734	252614	226939	319671	306790	393059	88712.6	252909	362514	430031	372427	443714	353911	304339
sp|P46130|YBHC_ECOLI	P46130	ybhC	Putative acyl-CoA thioester hydrolase YbhC	47757.9	85286.1	272680	127363	165758	215791	184247	35294.9	141988	155308	189760	246846	179270	123973	152499
sp|P46837|YHGF_ECOLI	P46837	yhgF	Protein YhgF	148033	153673	185342	317939	322217	229181	530079	82164.2	265244	363020	442081	223894	687151	406251	383982
sp|P46853|YHHX_ECOLI	P46853	yhhX	Uncharacterized oxidoreductase YhhX	188296	223489	484781	321509	415778	399800	620772	129903	319357	593881	668991	569476	560116	388332	377400
sp|P46859|GNTK_ECOLI	P46859	gntK	Thermoresistant gluconokinase	20167.4	37308.5	19016.6	55104.6	79279.5	20205.1	85931	31640.1	114230	31351	26227.6	23944.4	68259.5	21734.5	97648.7
sp|P51024|YAIL_ECOLI	P51024	yaiL	Uncharacterized protein YaiL	53094.1	80961.5	175234	89805.1	137460	152767	117756	37959.7	98743.1	119719	130772	116209	157750	144516	140740
sp|P52061|IXTPA_ECOLI	P52061	rdgB	dITP/XTP pyrophosphatase	12929.6	8625.76	83536.2	54233.4	114352	89348.9	87499	7363.53	51034.8	66140.1	105986	73159.7	204417	82613.9	106902
sp|P52108|RSTA_ECOLI	P52108	rstA	Transcriptional regulatory protein RstA	193585	195395	381733	166780	230074	256108	227863	41858.4	293381	359966	268937	461056	128279	251086	257971
sp|P52119|RATB_ECOLI	P52119	ratB	UPF0125 protein RatB	31115.1	61825.3	92581.6	84443	120734	113280	129827	41598	71562.7	127683	155550	110219	122049	137994	118561
sp|P52643|LDHD_ECOLI	P52643	ldhA	D-lactate dehydrogenase	56540.9	111676	92962.1	146133	134322	117311	247501	38071.3	121808	292895	284444	169141	266072	203899	187586
sp|P52697|6PGL_ECOLI	P52697	pgl	6-phosphogluconolactonase	207676	243757	657389	348618	534343	528940	568266	102575	404313	653686	736679	756962	584240	463594	525834
sp|P60240|RAPA_ECOLI	P60240	rapA	RNA polymerase-associated protein RapA	78883.4	123970	130172	193198	125474	72221.9	586697	120235	153989	366813	307129	194567	443035	301788	165885
sp|P60340|TRUB_ECOLI	P60340	truB	tRNA pseudouridine synthase B	36942.3	36934.2	422169	472711	532778	525348	399228	158486	300916	143428	174556	124196	393760	321006	332802
sp|P60390|RSMH_ECOLI	P60390	rsmH	Ribosomal RNA small subunit methyltransferase H	115228	108528	224762	174089	237416	234989	393297	78523	188590	362013	319205	242392	342260	196174	273760
sp|P60438|RL3_ECOLI	P60438	rplC	50S ribosomal protein L3	3.28135e+06	3.88391e+06	5.32482e+06	4666647	5785287	5.2857e+06	6.55243e+06	2.26192e+06	5676809	5.18233e+06	5216079	5.12685e+06	5.81479e+06	5.61598e+06	5987743
sp|P60546|KGUA_ECOLI	P60546	gmk	Guanylate kinase	44714.8	94138.4	169455	181885	285243	267505	500162	75935	168074	390817	229011	235836	364998	298008	214507
sp|P60560|GUAC_ECOLI	P60560	guaC	GMP reductase	159433	200486	262505	470481	617523	573575	421300	68171.6	253782	322848	393664	290734	828980	677149	729607
sp|P60624|RL24_ECOLI	P60624	rplX	50S ribosomal protein L24	1422227	2176421	2.68185e+06	2325018	2.34261e+06	2.05533e+06	2.97245e+06	1.35556e+06	2.46546e+06	2994233	2.63036e+06	1.98885e+06	4.01564e+06	3189433	2.82962e+06
sp|P60651|SPEB_ECOLI	P60651	speB	Agmatinase	135272	215017	559465	376214	584460	580856	657795	62194.8	411905	522983	596155	496871	833208	550722	597480
sp|P60716|LIPA_ECOLI	P60716	lipA	Lipoyl synthase	407010	582633	1.10828e+06	821168	1.03526e+06	1.03317e+06	4651644	288430	793707	746005	845142	824005	1.26573e+06	1.21855e+06	1.21698e+06
sp|P60723|RL4_ECOLI	P60723	rplD	50S ribosomal protein L4	726944	1.64383e+06	3133856	1.99872e+06	3.17928e+06	2971532	6240396	967034	2821807	3.60049e+06	4.15268e+06	2.64167e+06	5574238	3330875	3787898
sp|P60785|LEPA_ECOLI	P60785	lepA	Elongation factor 4	223073	287003	274612	459684	945938	857904	1.37208e+06	261487	552564	1.24658e+06	1.23448e+06	412811	1.03527e+06	1.0308e+06	901950
sp|P60906|SYH_ECOLI	P60906	hisS	Histidine--tRNA ligase	159194	166350	264045	463690	366695	375002	952375	144256	351367	698787	726117	344594	1.17252e+06	661876	513147
sp|P61175|RL22_ECOLI	P61175	rplV	50S ribosomal protein L22	2.4251e+06	2.63523e+06	3564264	2.97809e+06	3.39647e+06	2.72215e+06	4446387	1595894	3.61886e+06	3.5621e+06	3.99339e+06	3245733	5524100	3.71953e+06	3.61063e+06
sp|P61316|LOLA_ECOLI	P61316	lolA	Outer-membrane lipoprotein carrier protein	208597	308490	575009	481734	643181	609044	585064	110431	517078	657099	666254	683916	593915	525749	615484
sp|P61517|CAN_ECOLI	P61517	can	Carbonic anhydrase 2	472601	570689	1.11898e+06	917375	1.29556e+06	1.23467e+06	1.69546e+06	459707	845395	1.16627e+06	1.48404e+06	1.45811e+06	1.36889e+06	895235	869159
sp|P61714|RISB_ECOLI	P61714	ribE	6,7-dimethyl-8-ribityllumazine synthase	225628	346048	753186	580970	799136	716862	908853	170404	565737	731324	847108	649458	927613	784251	846880
sp|P61889|MDH_ECOLI	P61889	mdh	Malate dehydrogenase	6047267	8.18638e+06	14462037	14102611	18288924	16714100	6.24731e+06	1.26206e+06	9024836	12723804	15744635	15015617	12384704	11484589	11185452
sp|P61949|FLAV_ECOLI	P61949	fldA	Flavodoxin 1	71465.3	166287	531900	407680	657061	572526	893355	97489.2	374597	673322	827010	551545	1.08845e+06	687854	762572
sp|P62399|RL5_ECOLI	P62399	rplE	50S ribosomal protein L5	625178	1.35516e+06	3638579	2.52686e+06	4.13431e+06	3.20852e+06	7.91372e+06	962756	3.47909e+06	4601913	5098070	3.1317e+06	9388228	4.39861e+06	4.42044e+06
sp|P62620|ISPG_ECOLI	P62620	ispG	4-hydroxy-3-methylbut-2-en-1-yl diphosphate synthase (flavodoxin)	262838	246670	500544	362270	446420	522504	941946	205890	425229	719762	757034	615906	745715	466055	584876
sp|P62623|ISPH_ECOLI	P62623	ispH	4-hydroxy-3-methylbut-2-enyl diphosphate reductase	53692.3	74936	142065	130073	169599	138002	294888	39886.6	199998	227013	248777	156051	369361	206904	209775
sp|P62707|GPMA_ECOLI	P62707	gpmA	2,3-bisphosphoglycerate-dependent phosphoglycerate mutase	1.22127e+06	1653194	3.5683e+06	2.15374e+06	3.04207e+06	2.83416e+06	4.92848e+06	967956	2839920	5107024	5.6607e+06	4.0286e+06	4803850	3.03707e+06	3.06376e+06
sp|P62768|YAEH_ECOLI	P62768	yaeH	UPF0325 protein YaeH	803299	927129	1.70401e+06	1.0941e+06	1578266	1642972	872778	285805	885867	1.6359e+06	1.64132e+06	1.85675e+06	1.13141e+06	1.22486e+06	1.26806e+06
sp|P63020|NFUA_ECOLI	P63020	nfuA	Fe/S biogenesis protein NfuA	1.05145e+06	1.40466e+06	2.76214e+06	2029957	2.79593e+06	2.76609e+06	2988051	936354	2.38499e+06	2.86509e+06	3.01328e+06	2.86889e+06	3.01557e+06	2.7083e+06	2.67706e+06
sp|P63177|RLMB_ECOLI	P63177	rlmB	23S rRNA (guanosine-2'-O-)-methyltransferase RlmB	58777.2	54534.6	92074.5	88957.3	112013	89560.3	293376	78721.8	117657	198575	152335	111556	164758	130176	135344
sp|P63224|GMHA_ECOLI	P63224	gmhA	Phosphoheptose isomerase	564002	593956	825803	803573	841324	901183	940800	261216	797959	1.02758e+06	1.19255e+06	1.1533e+06	890575	923213	817257
sp|P63228|GMHBB_ECOLI	P63228	gmhB	D-glycero-beta-D-manno-heptose-1,7-bisphosphate 7-phosphatase	96240.7	101820	180450	123960	147415	164151	175009	67687.6	141520	168294	183915	182106	125010	155319	160653
sp|P63284|CLPB_ECOLI	P63284	clpB	Chaperone protein ClpB	705237	1.06997e+06	1.94729e+06	1.65176e+06	2.32867e+06	2.07089e+06	4.04233e+06	587086	1.28002e+06	2.65688e+06	3.90179e+06	2.1292e+06	3.72441e+06	2.35387e+06	2.08253e+06
sp|P63417|YHBS_ECOLI	P63417	yhbS	Uncharacterized N-acetyltransferase YhbS	17947.6	17163.3	44695	22682.5	45299.5	51640.6	21811.2	8791.37	26179.4	21679.4	39595.7	41039.1	39770.2	48090.3	53897.1
sp|P64429|YPFJ_ECOLI	P64429	ypfJ	Uncharacterized protein YpfJ	43760.4	49398.3	113698	82851.1	108872	116300	112944	5232.77	89037.2	115713	143932	130411	180529	102647	152419
sp|P64455|YDCY_ECOLI	P64455	ydcY	Uncharacterized protein YdcY	14686.2	21483.6	46224.3	68705.7	98728.4	73610.4	91803.3	24200.2	43467.1	126110	125117	105084	146009	112853	98313.3
sp|P64463|YDFZ_ECOLI	P64463	ydfZ	Putative selenoprotein YdfZ	12558	47102	84075.9	75334.5	92103.4	83460.8	82822.1	12979.1	36277	34671.8	62101.9	55840.5	363372	573531	275207
sp|P64467|CNU_ECOLI	P64467	cnu	OriC-binding nucleoid-associated protein	46585.3	52721.5	94138.2	63852.7	130119	84196.7	55441.7	20253.2	143334	50974.8	60758.9	93170.4	96436.6	121310	258201
sp|P64483|PROXY_ECOLI	P64483	proXp-y	Multifunctional Ser/Thr-tRNA deacylase ProXp-y	102171	212123	378152	262257	478659	366550	202198	53706.8	227440	269097	288622	368502	320946	335613	275105
sp|P64506|YEBY_ECOLI	P64506	yebY	Uncharacterized protein YebY	94692.3	168171	240446	216512	289121	237498	100639	26953.5	243479	255682	284975	303309	305510	302225	278663
sp|P64534|RCNB_ECOLI	P64534	rcnB	Nickel/cobalt homeostasis protein RcnB	12453.3	34601.8	132992	45177.1	139765	138955	91289	10312.2	64272.7	71925.9	81500.2	110380	181717	132602	150420
sp|P64554|QUEE_ECOLI	P64554	queE	7-carboxy-7-deazaguanine synthase	94501	119170	210016	96808.1	162161	209956	248885	81498.3	247493	165859	145722	151386	154814	156062	164929
sp|P64581|YQJD_ECOLI	P64581	yqjD	Uncharacterized protein YqjD	9222.03	17609.7	183243	36783.3	179931	188027	75108.3	8525.51	101052	85649.2	112504	245709	93855	46385.9	121259
sp|P64588|YQJI_ECOLI	P64588	yqjI	Transcriptional regulator YqjI	14051.3	33040.7	82359.9	58675.1	81606.3	98861.1	49042.3	11655.6	78129.2	66362.8	93657.1	74512.6	93293.2	117012	138999
sp|P64596|DOLP_ECOLI	P64596	dolP	Outer membrane lipoprotein DolP	71381.7	96670.7	193964	184445	230855	236852	162707	44392.8	97372.3	202516	218292	180123	206590	197764	174070
sp|P64602|MLAB_ECOLI	P64602	mlaB	Intermembrane phospholipid transport system binding protein MlaB	65244.9	168281	323982	253429	295106	315708	513198	47215.4	320038	346946	262820	315937	311394	340000	346113
sp|P64624|YHEO_ECOLI	P64624	yheO	Uncharacterized protein YheO	22249.6	30846.2	39300.8	44089.4	46574.7	42571.4	64565.6	23844.1	34858.1	72161.6	54179.7	47779.6	49956.8	50729.9	41437.8
sp|P65367|YQCA_ECOLI	P65367	yqcA	Flavodoxin YqcA	125773	124283	224894	128402	70434.3	224416	139012	45873.5	167179	188404	213383	226222	166636	156797	60317
sp|P65556|YFCD_ECOLI	P65556	yfcD	Uncharacterized Nudix hydrolase YfcD	65124.9	55187.2	58154.2	100163	110553	72699.8	77099.3	44673.5	91764.2	104481	95634	86622.6	175991	109904	120664
sp|P67087|RSMI_ECOLI	P67087	rsmI	Ribosomal RNA small subunit methyltransferase I	14422.1	15413.8	28246.3	24091.2	62687.5	28766.2	42846.6	7669.47	29618.2	43367.4	46493.7	88643	32993.3	41359.3	32474.8
sp|P67603|AC4CH_ECOLI	P67603	yqfB	N(4)-acetylcytidine amidohydrolase	145238	155087	274950	244881	273540	240633	292148	104764	210702	294350	282076	320368	338196	293681	245358
sp|P67826|CUTC_ECOLI	P67826	cutC	PF03932 family protein CutC	56405	62599.1	114291	82867	91436.2	89019.4	79784.4	33161	98609.7	86322.4	58496.5	114323	52831.6	76939.2	91555.3
sp|P67910|HLDD_ECOLI	P67910	hldD	ADP-L-glycero-D-manno-heptose-6-epimerase	618742	969577	2.30134e+06	1.5464e+06	2.30638e+06	2196104	3.46031e+06	550801	1.64347e+06	2116259	2.39591e+06	2.30079e+06	2.97961e+06	2.28211e+06	2.79974e+06
sp|P68066|GRCA_ECOLI	P68066	grcA	Autonomous glycyl radical cofactor	1.4502e+06	2.00625e+06	3.37257e+06	1.28186e+06	1576715	1.29048e+06	329494	79204.6	462787	705937	987590	1038743	3.36233e+06	3.34893e+06	3.01702e+06
sp|P68187|MALK_ECOLI	P68187	malK	Maltose/maltodextrin import ATP-binding protein MalK	97064.9	108347	169860	103350	107430	164574	173466	36282.8	71552.4	55210.3	50699.3	139710	90432.7	72319.7	75337.4
sp|P68206|YJBJ_ECOLI	P68206	yjbJ	UPF0337 protein YjbJ	331053	362022	606785	584200	586150	510380	587827	182280	249824	775724	557222	962647	342073	449059	275703
sp|P68679|RS21_ECOLI	P68679	rpsU	30S ribosomal protein S21	939500	1.09697e+06	1.00924e+06	1.18676e+06	1.01551e+06	964492	1.36892e+06	501933	1.10614e+06	1.36925e+06	1.19174e+06	959264	1.86428e+06	1436587	1.23668e+06
sp|P68767|AMPA_ECOLI	P68767	pepA	Cytosol aminopeptidase	50619.2	84627.6	244762	129262	328333	192172	354311	44131.1	89655.8	441030	248854	189265	316737	310383	294677
sp|P68919|RL25_ECOLI	P68919	rplY	50S ribosomal protein L25	1.05237e+06	1498477	3.10957e+06	2.34545e+06	3.57651e+06	3351913	3982818	1028991	3246928	3.01995e+06	2919984	3.55951e+06	5355599	4.08824e+06	4.40393e+06
sp|P69222|IF1_ECOLI	P69222	infA	Translation initiation factor IF-1	264197	692815	1.21225e+06	988728	1394239	1.35662e+06	1.47839e+06	423883	1.04904e+06	1.04655e+06	975729	1.01369e+06	1.67013e+06	1.642e+06	1.67956e+06
sp|P69228|BAER_ECOLI	P69228	baeR	Transcriptional regulatory protein BaeR	60596	102590	196903	88254.6	177332	131021	239195	58164.4	151352	196027	232988	216278	145672	192409	186165
sp|P69428|TATA_ECOLI	P69428	tatA	Sec-independent protein translocase protein TatA	23862.4	24573	64507.4	33075.7	52363.7	54803.9	41387	15296.9	37389.8	36068.3	47540.8	65206.8	46559.5	41414.5	68825.5
sp|P69441|KAD_ECOLI	P69441	adk	Adenylate kinase	2.16018e+06	3.43802e+06	5.57908e+06	4613748	6.80056e+06	6802529	4731072	1.38754e+06	4.56038e+06	4.48182e+06	4234886	5.01163e+06	7.23386e+06	7245815	7.72578e+06
sp|P69503|APT_ECOLI	P69503	apt	Adenine phosphoribosyltransferase	424045	569362	989279	728260	1.00799e+06	952736	1182931	308274	1.15727e+06	960406	1.0411e+06	1.02122e+06	1.30682e+06	984754	1.12846e+06
sp|P69776|LPP_ECOLI	P69776	lpp	Major outer membrane lipoprotein Lpp	49563.7	49912	108298	91325.3	102659	105960	70903.6	23665	77421.4	75961	62609.5	89306.8	100437	101789	118313
sp|P69783|PTGA_ECOLI	P69783	crr	PTS system glucose-specific EIIA component	2.38024e+06	3235725	5.40144e+06	3.66486e+06	5142229	4.84675e+06	4.38169e+06	1.65649e+06	4.13575e+06	5444136	5717205	5.75046e+06	4.84893e+06	5177791	4.80506e+06
sp|P69797|PTNAB_ECOLI	P69797	manX	PTS system mannose-specific EIIAB component	343721	534283	1.55943e+06	615948	1.02776e+06	958231	1.6061e+06	206494	656390	1760462	2.25703e+06	1.30109e+06	1296335	877708	910063
sp|P69811|PTFAH_ECOLI	P69811	fruB	Multiphosphoryl transfer protein	258727	249023	304630	625198	383787	181731	1.46717e+06	565329	687001	508062	523352	595395	514263	465308	614011
sp|P69828|PTKA_ECOLI	P69828	gatA	PTS system galactitol-specific EIIA component	100168	135952	541244	308824	647781	382083	288340	9084.84	253826	1.44638e+06	1.4379e+06	817501	715830	520272	418479
sp|P69829|PTSN_ECOLI	P69829	ptsN	Nitrogen regulatory protein	41786.6	76603.5	103140	131337	69797	107028	21533.9	32733.9	100092	141702	138946	137115	46579.6	74018.6	83528.9
sp|P69874|POTA_ECOLI	P69874	potA	Spermidine/putrescine import ATP-binding protein PotA	43742.4	25643.5	75950.4	53820.9	70429.4	74758.1	396319	51529.9	106089	144660	135877	60252.8	221825	105708	125258
sp|P69924|RIR2_ECOLI	P69924	nrdB	Ribonucleoside-diphosphate reductase 1 subunit beta	65379.6	128243	388010	65817.2	91502.5	93261.4	535315	194850	526580	321985	663052	91523.8	230093	601721	643976
sp|P75691|YAHK_ECOLI	P75691	yahK	Aldehyde reductase YahK	207981	227919	560528	410515	421343	463017	298667	104408	189241	948967	1.0516e+06	1.31722e+06	298799	279641	261377
sp|P75694|YAHO_ECOLI	P75694	yahO	Uncharacterized protein YahO	36226.9	94789.1	130571	164992	211054	156061	89564.2	16540.7	76489.9	518178	611714	595475	77348.9	91718.5	70845.4
sp|P75736|YBFF_ECOLI	P75736	ybfF	Esterase YbfF	20939.7	43047.5	51993.6	66543.1	64042.9	64285	77107.6	17568	43662.4	81692.4	93050.3	64702.9	95733.6	72508.2	44078.8
sp|P75792|SUPH_ECOLI	P75792	ybiV	Sugar phosphatase YbiV	19681.3	26904.7	61244.1	59650.3	72499.2	31693	188708	25407.8	36872	108840	119934	69719.5	273410	154074	35897
sp|P75797|GSIB_ECOLI	P75797	gsiB	Glutathione-binding protein GsiB	147745	208684	446888	352760	446638	482749	197451	17626	302358	615904	664822	570675	381448	426694	368091
sp|P75823|LTAE_ECOLI	P75823	ltaE	Low specificity L-threonine aldolase	155007	179901	259298	203548	255020	237711	305055	76709	229892	374007	267325	324629	303025	217004	215437
sp|P75838|YCAO_ECOLI	P75838	ycaO	Ribosomal protein S12 methylthiotransferase accessory factor YcaO	30897.5	38073.9	72207.2	80446	98632.4	40407.7	240642	5524.61	88528	75421.5	101659	85091.5	186590	133785	98090.5
sp|P75849|GLO22_ECOLI	P75849	gloC	Hydroxyacylglutathione hydrolase GloC	133152	211917	407529	256088	379393	396185	293710	63187.2	280264	367976	437312	438550	442485	330791	359263
sp|P75863|YCBX_ECOLI	P75863	ycbX	Uncharacterized protein YcbX	14596.1	17063.5	65857.3	58665	43659.5	41778.3	79473.4	12275.5	43965.9	60024.3	39973.6	31713.8	86386.5	60562.4	41319.2
sp|P75874|YCCU_ECOLI	P75874	yccU	Uncharacterized protein YccU	130531	225345	381079	320771	409547	378435	400649	66474.7	294456	548659	584631	481855	566861	468124	426184
sp|P75876|RLMI_ECOLI	P75876	rlmI	Ribosomal RNA large subunit methyltransferase I	98598.7	166883	259241	262280	245759	361024	479100	110973	237778	225867	296823	338285	505577	332737	291391
sp|P75913|GHRA_ECOLI	P75913	ghrA	Glyoxylate/hydroxypyruvate reductase A	45802.7	72847.2	119707	144275	208073	131862	102040	11420	105867	125874	204539	79821.9	505525	172523	149143
sp|P75914|YCDX_ECOLI	P75914	ycdX	Probable phosphatase YcdX	44210.6	72737.7	213840	102699	195875	190595	248441	7197.86	163543	201682	139918	107405	249072	235913	183487
sp|P75915|YCDY_ECOLI	P75915	ycdY	Chaperone protein YcdY	60950.6	103420	246568	149006	221743	242694	261517	46644.1	200029	131491	279278	210442	376875	244818	234709
sp|P75937|FLGE_ECOLI	P75937	flgE	Flagellar hook protein FlgE	539970	615529	987186	675087	1.08968e+06	740777	462339	74970.1	741762	885582	913452	1.11777e+06	1.72955e+06	1.02149e+06	1.19953e+06
sp|P75938|FLGF_ECOLI	P75938	flgF	Flagellar basal-body rod protein FlgF	175572	148218	220892	108991	93677.7	121195	54129.7	10045.9	237584	114058	88805.4	133321	235198	92721.8	151928
sp|P75949|NAGZ_ECOLI	P75949	nagZ	Beta-hexosaminidase	71042.4	99115.4	138900	187854	89225.6	110610	242994	69993.5	118100	233796	138900	215839	407180	173439	208037
sp|P75957|LOLD_ECOLI	P75957	lolD	Lipoprotein-releasing system ATP-binding protein LolD	144393	162944	274261	180346	249519	239615	364272	101596	225333	291085	292933	266072	271573	242410	263227
sp|P75960|NPD_ECOLI	P75960	cobB	NAD-dependent protein deacylase	7578.41	31788.5	181282	80964	112986	106165	159643	8746.1	121963	258124	312322	219819	245977	190516	157741
sp|P76004|YCGM_ECOLI	P76004	ycgM	Uncharacterized protein YcgM	53514.4	38302.7	115975	77780.1	53756.2	93753.5	55740.7	19435.4	62838.2	93574.3	50054.6	67370.2	48999.2	46164.7	37591.8
sp|P76014|DHAL_ECOLI	P76014	dhaL	PEP-dependent dihydroxyacetone kinase, ADP-binding subunit DhaL	87610.7	96965.5	259214	113492	146441	177456	410736	61552.3	173991	225747	113109	236885	293915	194551	178969
sp|P76015|DHAK_ECOLI	P76015	dhaK	PEP-dependent dihydroxyacetone kinase, dihydroxyacetone-binding subunit DhaK	107401	124099	198914	105937	161196	161172	624312	76863.4	256268	263539	290905	214174	411735	232826	232593
sp|P76055|TTCA_ECOLI	P76055	ttcA	tRNA-cytidine(32) 2-sulfurtransferase	97400.2	124494	295142	220121	295385	304225	513417	88748.6	297706	220530	248309	239952	634318	330138	380426
sp|P76116|YNCE_ECOLI	P76116	yncE	Uncharacterized protein YncE	192372	350496	752670	900422	1.38941e+06	1.13075e+06	1398620	269047	812152	1.6641e+06	1.74445e+06	1.36383e+06	1.17141e+06	897435	961904
sp|P76170|YNFB_ECOLI	P76170	ynfB	UPF0482 protein YnfB	77351.3	104512	220940	185926	262536	254176	139795	34344.3	144924	207768	231608	271377	242717	210947	246114
sp|P76177|YDGH_ECOLI	P76177	ydgH	Protein YdgH	1.09188e+06	1.30642e+06	2.57571e+06	1.94184e+06	2.41746e+06	2.19666e+06	1.56375e+06	436324	1.64168e+06	2171258	2301271	2503703	2.318e+06	2.07822e+06	2.03053e+06
sp|P76187|YDHF_ECOLI	P76187	ydhF	Oxidoreductase YdhF	140160	182316	299108	166780	167443	217625	200910	72380.8	154186	225834	261175	287629	209964	140487	153692
sp|P76193|YNHG_ECOLI	P76193	ynhG	Probable L,D-transpeptidase YnhG	18514.7	61958	138066	104181	134495	181804	148289	18496.8	86946.4	227240	208501	220930	31574.1	77593.8	56409.5
sp|P76268|KDGR_ECOLI	P76268	kdgR	HTH-type transcriptional regulator KdgR	84985	170240	294986	251726	305366	294564	543821	106496	336895	359772	455340	299073	990926	426736	372956
sp|P76270|MSRC_ECOLI	P76270	msrC	Free methionine-R-sulfoxide reductase	62081.3	78967.7	203568	151137	177956	190248	178903	46923	255062	204858	183768	221384	164907	183132	195537
sp|P76290|CMOA_ECOLI	P76290	cmoA	Carboxy-S-adenosyl-L-methionine synthase	26344.4	62512.7	135008	41049.3	185927	102041	296071	15629.7	80361.3	238581	242674	151585	137730	237131	178516
sp|P76316|DCYD_ECOLI	P76316	dcyD	D-cysteine desulfhydrase	106577	116612	176179	141351	437232	399121	283017	33858.1	330436	336020	461019	214956	240879	162066	267795
sp|P76535|MURQ_ECOLI	P76535	murQ	N-acetylmuramic acid 6-phosphate etherase	7095.42	17176.8	30697.3	24459.3	29560.6	29892.7	170789	3200.91	44158.1	44264.9	42792.1	44866.4	70330.6	34959	37446.6
sp|P76537|YFEY_ECOLI	P76537	yfeY	Uncharacterized protein YfeY	13637.6	20247.9	32363.2	28689.2	30910.9	63549.3	31246.4	11142.9	19750.7	27832.8	36278.8	28472.3	19665.7	43477	41020.9
sp|P76550|YFFS_ECOLI	P76550	yffS	Uncharacterized protein YffS	123395	160336	379383	226086	363663	397108	260041	86222.5	254674	339316	422684	423109	235593	257323	320797
sp|P76558|MAO2_ECOLI	P76558	maeB	NADP-dependent malic enzyme	264881	411638	600201	961750	1.03875e+06	822336	899048	86339.6	405278	1.65866e+06	1938314	884181	1.93405e+06	1.01735e+06	974345
sp|P76561|YPFH_ECOLI	P76561	ypfH	Esterase YpfH	7219.57	17065.3	28007.5	27886.1	43198.7	39155.4	51983.8	4918	20852.8	53316	50316	49660.9	42322.5	34115.3	45847.3
sp|P76569|YFGD_ECOLI	P76569	yfgD	Uncharacterized protein YfgD	35248.6	107163	309543	220767	330112	337652	364614	40571.1	257250	386756	421383	376993	396078	386922	381560
sp|P76575|YFGJ_ECOLI	P76575	yfgJ	Uncharacterized protein YfgJ	35581.8	31748.2	27360.5	66175.5	9239.87	59034.2	67358.7	40448.5	25217.1	55605.6	57434.9	46450.1	147174	55697.8	28609.5
sp|P76576|YFGM_ECOLI	P76576	yfgM	Ancillary SecYEG translocon subunit	45712.6	105403	234351	196523	265902	266628	295176	26917.8	166544	245520	293761	230394	391633	248062	281288
sp|P76658|HLDE_ECOLI	P76658	hldE	Bifunctional protein HldE	281376	342238	443968	436817	562309	500176	1.21786e+06	295145	450514	573320	498095	404368	944745	599984	671395
sp|P77150|PDXY_ECOLI	P77150	pdxY	Pyridoxal kinase PdxY	38149.1	93002.2	295126	131247	275461	221541	364483	53486.4	196353	330362	426973	335404	359655	328868	312765
sp|P77202|DSBG_ECOLI	P77202	dsbG	Thiol:disulfide interchange protein DsbG	36611.3	58370.1	555287	103032	157798	560841	173010	21205.1	429391	501175	182394	173862	232523	182670	544991
sp|P77247|HXPB_ECOLI	P77247	hxpB	Hexitol phosphatase B	81312.7	164080	301621	218235	243284	333985	237039	48432.2	310033	237941	372228	330976	386983	338216	277769
sp|P77258|NEMA_ECOLI	P77258	nemA	N-ethylmaleimide reductase	105219	101803	187672	160544	194718	163320	351590	75313.4	172607	289800	247897	237058	349039	218598	224415
sp|P77285|RSXG_ECOLI	P77285	rsxG	Ion-translocating oxidoreductase complex subunit G	46289.3	99279.5	23638	100591	42129.1	44963	79789.9	6052.92	25118.9	59425.2	50375.5	49009.8	200185	118548	111500
sp|P77348|MPPA_ECOLI	P77348	mppA	Periplasmic murein peptide-binding protein	77835.6	110684	469331	209612	320778	382930	77975.1	4250.56	130926	411876	551445	375487	410584	380458	342617
sp|P77395|CNOX_ECOLI	P77395	cnoX	Chaperedoxin	63022.8	149137	520286	259923	490684	473898	694075	82106.7	398362	847517	1140029	556829	1.13405e+06	623353	626693
sp|P77488|DXS_ECOLI	P77488	dxs	1-deoxy-D-xylulose-5-phosphate synthase	74907.1	72066.9	81080.8	145819	151472	126584	344684	40730.5	98395.1	258738	400054	145588	366751	223520	110863
sp|P77552|YDHQ_ECOLI	P77552	ydhQ	Uncharacterized protein YdhQ	82878.8	94259.5	149940	219614	274042	237873	333459	42192.8	197910	382067	398997	286410	385220	372395	272695
sp|P77695|GNSB_ECOLI	P77695	gnsB	Protein GnsB	604999	728462	1234648	922406	1.18344e+06	1.14956e+06	597223	246555	890259	1.06179e+06	1.11893e+06	1.37977e+06	870831	1.06898e+06	966276
sp|P77735|YAJO_ECOLI	P77735	yajO	1-deoxyxylulose-5-phosphate synthase YajO	70059.4	85237.3	137167	140161	153781	161933	399033	33432.5	69561.8	300668	291260	190330	314018	119036	103226
sp|P77754|SPY_ECOLI	P77754	spy	Periplasmic chaperone Spy	76667.3	83966.3	155318	120900	134481	141937	41621	29873.1	93687.9	194914	205850	229184	147134	174302	133189
sp|P77774|BAMB_ECOLI	P77774	bamB	Outer membrane protein assembly factor BamB	92345.8	99343.3	361720	208184	203322	260058	278928	48835.6	189691	184284	178700	272761	149714	192337	172650
sp|P77804|YDGA_ECOLI	P77804	ydgA	Protein YdgA	162473	217390	523034	414791	457289	484428	540483	73058.2	296513	813141	921823	752317	681408	364877	390265
sp|P77808|CINAL_ECOLI	P77808	yfaY	NMN amidohydrolase-like protein YfaY	9385.99	6651.47	10996.1	12949.3	13285.2	14492.1	95775.6	4463.77	11372.9	47800.5	60434.9	17363.5	80620.9	15349.4	21706.6
sp|Q2M7R5|YIBT_ECOLI	Q2M7R5	yibT	Uncharacterized protein YibT	112182	187667	424595	215135	332592	350551	333151	116088	241111	378096	337390	513577	294387	313943	306555
sp|Q46829|BGLA_ECOLI	Q46829	bglA	6-phospho-beta-glucosidase BglA	110731	137275	309949	244397	349904	285935	660692	78049.4	267386	417412	456115	267713	647068	485270	309245
sp|Q46845|YGHU_ECOLI	Q46845	yghU	Disulfide-bond oxidoreductase YghU	11381.1	24975.7	63598.3	52533.6	68506.1	63555.3	68430.5	7562.2	30474.5	121509	142608	86222.7	77261.1	58990.8	53009.1
sp|Q46856|YQHD_ECOLI	Q46856	yqhD	Alcohol dehydrogenase YqhD	42669.6	49693.9	103521	69708.8	81854.7	86826.9	326526	70671.2	114943	127001	119698	108499	296188	149529	148595
sp|Q46857|DKGA_ECOLI	Q46857	dkgA	2,5-diketo-D-gluconic acid reductase A	26135.1	21469.9	70097.2	82918	83768.6	69920.3	207808	26195.3	73461.4	120252	125441	110335	132745	118084	105896
sp|Q46868|UBIK_ECOLI	Q46868	ubiK	Ubiquinone biosynthesis accessory factor UbiK	238983	292666	515562	429201	561662	530767	669775	171287	393480	616652	551269	522623	632776	532654	528922
sp|Q46893|ISPD_ECOLI	Q46893	ispD	2-C-methyl-D-erythritol 4-phosphate cytidylyltransferase	35461	43803.3	80766.3	52083.1	84516.3	69645.1	58525.4	25881.3	59825.1	23453.6	72151.3	77033.5	78131.5	103094	106100
sp|Q46948|YAJL_ECOLI	Q46948	yajL	Protein/nucleic acid deglycase 3	17278.8	68091.7	71779.6	57381.1	112050	104111	97409.1	17345.7	96807.4	92480.2	180886	75714.3	94974.8	84462.6	80790.7
sp|Q47150|DINJ_ECOLI	Q47150	dinJ	Antitoxin DinJ	57452.6	73110.3	151501	128818	186521	175893	104922	29072.4	97628	148067	128734	128538	160868	168805	173786
sp|Q57261|TRUD_ECOLI	Q57261	truD	tRNA pseudouridine synthase D	50201.4	41945.7	63573.6	63108.5	82059.4	87514.9	162603	50779.9	1.77617e+06	163643	112266	64619	201685	96890.8	97736.9
sp|P00370|DHE4_ECOLI	P00370	gdhA	NADP-specific glutamate dehydrogenase	75003.5	91395.5	162919	305758	274221	284842	119377	0	99302.6	380249	331634	271198	209028	167983	126792
sp|P00805|ASPG2_ECOLI	P00805	ansB	L-asparaginase 2	21791.5	204251	176349	167773	189836	173937	79837.2	0	54192.2	5890.34	25896.7	55871.8	868849	718309	517802
sp|P02931|OMPF_ECOLI	P02931	ompF	Outer membrane porin F	31902.1	12617.7	21322.6	49318.8	65314.9	35522.5	78552.3	13597	52107.1	0	62043.8	20916	39774.5	43257.3	35718.9
sp|P02942|MCP1_ECOLI	P02942	tsr	Methyl-accepting chemotaxis protein I	16787.1	82720.2	194116	151031	171728	89646.1	67624.3	0	67636.1	92885.2	94451.2	70303.7	294093	91355.6	143176
sp|P03023|LACI_ECOLI	P03023	lacI	Lactose operon repressor	11288.4	4003.52	29532.5	24304.7	16091.5	35727.9	34741.5	0	58238.4	42438.7	27562.4	10722.3	20102	14246.4	15834.6
sp|P05791|ILVD_ECOLI	P05791	ilvD	Dihydroxy-acid dehydratase	12864.7	20184.2	171763	127567	141320	251466	338240	0	64696	183146	246348	223305	157097	98373.1	122588
sp|P06987|HIS7_ECOLI	P06987	hisB	Histidine biosynthesis bifunctional protein HisB	15275.1	12692.7	40615.9	37846.6	37221.3	27565	80525.7	0	9419.25	62809.3	130934	42304.8	44637.5	23869.5	51361.4
sp|P06992|RSMA_ECOLI	P06992	rsmA	Ribosomal RNA small subunit methyltransferase A	0	80497	115487	152171	172296	122200	368599	88443.9	131874	258146	299227	152278	259754	163023	188251
sp|P07003|POXB_ECOLI	P07003	poxB	Pyruvate dehydrogenase [ubiquinone]	33809.2	22279.1	40890.2	77473.2	44302.8	28946.7	68661.6	23541.5	8749.6	220226	196834	124945	0	11564	28251.7
sp|P07639|AROB_ECOLI	P07639	aroB	3-dehydroquinate synthase	30094.1	27159	47888.1	22283.4	54617.4	34780.6	123673	0	45919.9	63264	69382.2	43282.9	173270	34742	40625.8
sp|P09127|HEMX_ECOLI	P09127	hemX	Protein HemX	8680.53	26940.7	93577.1	44421.6	71919	78078.3	44089.6	0	22652.4	22566	28247.7	42822.8	36727.6	34274.2	45978.5
sp|P09424|MTLD_ECOLI	P09424	mtlD	Mannitol-1-phosphate 5-dehydrogenase	0	18064	52940.2	51393.7	76227.2	47006.6	167590	14934.5	19766.8	199722	224171	90465	181581	72947.7	55978.9
sp|P09546|PUTA_ECOLI	P09546	putA	Bifunctional protein PutA	50234.9	56145.3	24979	182039	215574	141655	30756.2	0	26361.4	290773	293180	46012.4	150174	150158	114196
sp|P0A698|UVRA_ECOLI	P0A698	uvrA	UvrABC system protein A	30713.4	5583.13	30165.5	113232	83941.5	71636.7	235487	0	66786	140538	180666	65207	292512	94719.7	100369
sp|P0A6E1|AROL_ECOLI	P0A6E1	aroL	Shikimate kinase 2	16414.8	20198.3	31650.5	26930.6	25010.9	30774.3	26449.3	10299.5	30580.8	35012	104867	29336.4	31436.6	32381.1	39801.9
sp|P0A6E6|ATPE_ECOLI	P0A6E6	atpC	ATP synthase epsilon chain	0	24761.4	142251	28504.9	103577	108180	145286	10259	105133	127081	204788	111095	325944	126126	174694
sp|P0A6R3|FIS_ECOLI	P0A6R3	fis	DNA-binding protein Fis	0	56237.5	358318	71060.9	350012	366333	228079	141039	504087	253761	244047	315245	311235	484521	458813
sp|P0A6U5|RSMG_ECOLI	P0A6U5	rsmG	Ribosomal RNA small subunit methyltransferase G	18382.3	24797.3	77955.5	39982.5	38500.4	72433.7	350837	66473.6	117711	98389.9	96994.6	88510.6	224894	91855.9	146213
sp|P0A7A5|PIMT_ECOLI	P0A7A5	pcm	Protein-L-isoaspartate O-methyltransferase	11319.5	0	42737.9	47592.3	35764.1	34818.4	142226	18333.5	31087.1	81547.8	52816.5	11076.1	67906.4	50074	85348.7
sp|P0A7B5|PROB_ECOLI	P0A7B5	proB	Glutamate 5-kinase	38168.5	42659.8	45979.4	65005.3	67810.6	67730.8	113536	0	70800.4	102437	124258	81431.5	66259.2	68050.7	80529.8
sp|P0A809|RUVA_ECOLI	P0A809	ruvA	Holliday junction branch migration complex subunit RuvA	23499	0	53922.4	25529	32468.1	39999.5	31161.7	12464.6	24993.3	44188.5	57037.2	31605.8	32143.8	28987.4	87482
sp|P0A898|YBEY_ECOLI	P0A898	ybeY	Endoribonuclease YbeY	0	27982.3	13204.2	53223.9	103905	14222.4	80323.7	12640.3	63093.1	78161.2	96998.1	100980	79147.9	18826.1	78974.6
sp|P0A8A4|PSRP_ECOLI	P0A8A4	ppsR	Phosphoenolpyruvate synthase regulatory protein	33745.2	50252.1	110902	99934.2	138337	125773	81168.1	0	83706.8	142000	150264	144187	188028	135666	141334
sp|P0A8K1|PSD_ECOLI	P0A8K1	psd	Phosphatidylserine decarboxylase proenzyme	0	10245.5	27853.9	9653.62	33660.8	41183.9	116360	6124.8	23272.3	46606.1	50079.4	29450.7	59154.8	37984.1	59487.2
sp|P0A8L7|YCIU_ECOLI	P0A8L7	yciU	UPF0263 protein YciU	11450.5	9419.61	19744.6	12980.6	16776.6	21437.8	10195.9	0	15398	12811.4	13758	24301.6	12892.8	15385.9	19211.9
sp|P0A8S9|FLHD_ECOLI	P0A8S9	flhD	Flagellar transcriptional regulator FlhD	29170.6	29085.1	29371.5	31532.8	38565.5	31898.6	21830.4	5058.59	33871.4	26605.9	0	18343.7	24526.2	30074.7	32600.5
sp|P0A962|ASPG1_ECOLI	P0A962	ansA	L-asparaginase 1	8083.16	37563.8	0	70226.9	85567.9	67417.4	67337.4	24141.3	83400.4	89605.4	96295	19357.3	76753.2	87349.6	56387.5
sp|P0A9F3|CYSB_ECOLI	P0A9F3	cysB	HTH-type transcriptional regulator CysB	21379.5	15690.4	33941	22737.7	28492.2	17470.1	66309.7	0	18866.1	36108.9	96282.4	20064.4	103979	59024	65690.3
sp|P0A9S1|FUCO_ECOLI	P0A9S1	fucO	Lactaldehyde reductase	83649.6	104528	226274	181731	213508	169689	128273	0	69000.9	328316	284782	340611	122809	84455.4	90142.2
sp|P0A9U6|PUUR_ECOLI	P0A9U6	puuR	HTH-type transcriptional regulator PuuR	28331.4	38301.7	40456.8	61813.3	70347.7	70129.6	0	3738.94	33462.6	44156.8	28817.9	56931.1	47418.4	32172	30178.4
sp|P0AAP3|FRMR_ECOLI	P0AAP3	frmR	Transcriptional repressor FrmR	70788.5	91909.3	127487	65244.8	121533	151137	46180	0	111647	50588.7	55379.3	148761	53364.2	112875	157672
sp|P0AB46|YMGD_ECOLI	P0AB46	ymgD	Uncharacterized protein YmgD	6251.63	13413.7	17590.5	24980.4	29956.1	33900.9	0	4903.38	22403.4	31275.6	43368.6	41967.7	81425.3	32174.7	25819.1
sp|P0AB80|ILVE_ECOLI	P0AB80	ilvE	Branched-chain-amino-acid aminotransferase	25677.5	34693.8	76090.5	82867.1	96795.7	80504.9	167203	0	57653	131707	190162	139378	129944	63066.3	86996.8
sp|P0ABH0|FTSA_ECOLI	P0ABH0	ftsA	Cell division protein FtsA	39444	26116.4	55761.3	26621.6	35310.1	39459	77705.7	15950.2	31564.6	71901	68137.1	73661.3	132805	65614.4	64522.3
sp|P0ABW9|FLGB_ECOLI	P0ABW9	flgB	Flagellar basal body rod protein FlgB	67968.7	83839.3	218552	96180.3	118547	133804	18619.6	0	34701.1	104982	74222.1	117881	172392	149977	179599
sp|P0ABX2|FLGC_ECOLI	P0ABX2	flgC	Flagellar basal-body rod protein FlgC	123678	83300.5	169849	148895	126329	95682.2	37023	0	208117	152576	103418	100208	324285	118483	301350
sp|P0ABX5|FLGG_ECOLI	P0ABX5	flgG	Flagellar basal-body rod protein FlgG	95289.2	139554	330480	157412	263598	287955	113100	0	155557	300159	299587	266122	424372	184382	311280
sp|P0ACK2|AGAR_ECOLI	P0ACK2	agaR	Putative aga operon transcriptional repressor	9993.05	12536.9	57340.5	21467.2	55684.5	51447	52752.3	0	30070.7	54345.6	57347.8	55303	75933.3	49968.7	60852.9
sp|P0ACK5|DEOR_ECOLI	P0ACK5	deoR	Deoxyribose operon repressor	0	12134.3	15714.7	15493.6	13729.2	14229.8	21759.7	9030.41	22890.7	21529.5	18911.4	23644.1	21132	43532.3	17003.1
sp|P0AD12|YEEZ_ECOLI	P0AD12	yeeZ	Protein YeeZ	37375.5	49798.4	142183	74548.6	83046.2	93447.2	79141.8	0	56370.3	73707.5	72040.5	97118.2	44752.8	79538.9	43617.7
sp|P0AD96|LIVJ_ECOLI	P0AD96	livJ	Leu/Ile/Val-binding protein	5548.87	12452.7	24381	24675.5	26023.8	29558.7	6940.68	0	12037.9	12215.8	13844.5	17498.5	13043.9	10665.4	21825.2
sp|P0ADA1|TESA_ECOLI	P0ADA1	tesA	Thioesterase 1/protease 1/lysophospholipase L1	121192	182756	385925	222902	363114	377552	67953.7	0	236243	350733	391993	441935	195701	264948	262865
sp|P0ADB7|ECNB_ECOLI	P0ADB7	ecnB	Entericidin B	0	12416.2	37448.7	32488.4	39091.5	37798.6	42773.1	8026.2	18572.7	118054	113212	68715.7	29840.1	29467.3	20606.2
sp|P0ADI4|ENTB_ECOLI	P0ADI4	entB	Enterobactin synthase component B	0	5069.46	17694.7	25225.5	35296.6	13458.9	202341	38476.7	13231.8	99054.5	115316	76202.8	47496.2	34405.9	12763.6
sp|P0ADP0|YIGB_ECOLI	P0ADP0	yigB	5-amino-6-(5-phospho-D-ribitylamino)uracil phosphatase YigB	16673.4	9852.9	29429	14983	64177.5	28137.6	48136.6	8890.62	22098	54814.4	73335.4	48148.9	50810.5	37820.9	66947.4
sp|P0ADV7|MLAC_ECOLI	P0ADV7	mlaC	Intermembrane phospholipid transport system binding protein MlaC	15228.1	14912.2	125026	48765.7	103579	114019	69447.2	0	72619.7	137440	108621	89849.9	98532.2	191001	126701
sp|P0ADX7|YHHA_ECOLI	P0ADX7	yhhA	Uncharacterized protein YhhA	8265.92	8297	16837.7	21996.9	97837.7	37420.4	63131.2	0	10369.7	123975	88736.1	107119	32940	33471.4	26940.9
sp|P0ADX9|RSMD_ECOLI	P0ADX9	rsmD	Ribosomal RNA small subunit methyltransferase D	40964	37368.8	69142.7	43581	65505.6	65578.8	37414.2	25250	68863.8	31078.3	29342.1	77961.9	51043.1	0	68694.8
sp|P0AE48|YTFP_ECOLI	P0AE48	ytfP	Gamma-glutamylcyclotransferase family protein YtfP	48321.6	99483.6	270190	42426.8	130048	190018	227548	0	197177	81335.2	108343	98692.2	252790	238780	234998
sp|P0AE60|CEDA_ECOLI	P0AE60	cedA	Cell division activator CedA	14544.9	15107.4	24925	0	27754.3	27450.4	41128.7	11803.1	31157.2	33719.9	34537.8	43268.2	37717.4	31263.2	39367.1
sp|P0AE70|MAZF_ECOLI	P0AE70	mazF	Endoribonuclease toxin MazF	28575.2	37744.7	87821.9	62514.6	98374.5	100079	32863.3	7977.76	47559.7	67613.3	90016.5	93377.1	0	79019.4	85707.3
sp|P0AE78|CORC_ECOLI	P0AE78	corC	Magnesium and cobalt efflux protein CorC	18290.1	22990.3	36774	36361.2	57783.6	36766	63349.2	0	16485	79966.9	112620	36934.9	121030	76316.3	95177
sp|P0AEA8|CYSG_ECOLI	P0AEA8	cysG	Siroheme synthase	8009.48	8601.9	44821.3	8815.96	28392	42725	78235.7	5779.26	15505.6	32585.2	78748.4	32314.4	11666.7	0	49858.3
sp|P0AEH5|ELAB_ECOLI	P0AEH5	elaB	Protein ElaB	16943.7	16514.3	59184.7	26564.6	47664	37355.8	15961.1	0	22331.9	46334.9	42908.9	111880	14299.6	22734.6	25590.9
sp|P0AES2|GUDD_ECOLI	P0AES2	gudD	Glucarate dehydratase	10910	19011.9	59134.8	34630.7	51878.6	33229.1	27546.8	0	62419.8	186035	181757	105041	114994	36093.9	35205.4
sp|P0AF20|NAGC_ECOLI	P0AF20	nagC	N-acetylglucosamine repressor	31336.5	15010.5	10231.2	53985	38024.4	13439.8	90064.8	0	25146.6	100147	137928	53247.1	139855	57611.4	30274.2
sp|P0AF90|RRAB_ECOLI	P0AF90	rraB	Regulator of ribonuclease activity B	44532.6	84318.4	161546	198595	268292	227344	227427	0	136705	307993	380480	325139	361868	273333	333586
sp|P0AFJ5|PHOB_ECOLI	P0AFJ5	phoB	Phosphate regulon transcriptional regulatory protein PhoB	29622.7	28312.8	18320.8	57323.7	52086	40119.7	27660.9	0	37928.1	24730.7	25068.1	41923.3	60141.7	60469.4	64422.5
sp|P0AFM4|PSIF_ECOLI	P0AFM4	psiF	Phosphate starvation-inducible protein PsiF	6126.44	6405.77	16101.3	16892.1	31393.3	40045.5	13418.6	0	5910.98	48339.6	42971.6	55051.9	8149.75	8930	7766.59
sp|P0AG80|UGPB_ECOLI	P0AG80	ugpB	sn-glycerol-3-phosphate-binding periplasmic protein UgpB	27101.8	39547.7	145286	174956	247287	258962	80876.9	0	77929.9	333431	527664	415815	115839	122081	104440
sp|P0AG82|PSTS_ECOLI	P0AG82	pstS	Phosphate-binding protein PstS	35994.3	144325	324592	255525	408586	394308	114424	0	150259	297052	266555	185791	399234	463483	346948
sp|P0AG99|SECG_ECOLI	P0AG99	secG	Protein-export membrane protein SecG	31184	31755.3	68554.1	69417.4	77250.5	78514.7	70031.1	0	49855.4	64450.3	41206.3	50418.2	101015	76173.4	75245.9
sp|P0AGB0|SERB_ECOLI	P0AGB0	serB	Phosphoserine phosphatase	33674.2	13696.3	17656.4	21864.8	30108.1	11660.8	75669.1	10238.6	57695.8	52642	31470.2	0	157046	27085.9	17806.5
sp|P0AGF2|CSDE_ECOLI	P0AGF2	csdE	Sulfur acceptor protein CsdE	0	20507.2	45134	29338.5	47718.5	45289.2	122434	12632.9	55923.5	90561.7	91086	74102.2	130003	89034.9	77146.9
sp|P0AGG2|TESB_ECOLI	P0AGG2	tesB	Acyl-CoA thioesterase 2	0	30116	83980.1	52978.7	102745	85450.4	187956	23448.2	46617.7	141171	160695	102931	127966	117561	110854
sp|P0C0L9|ISCX_ECOLI	P0C0L9	iscX	Protein IscX	18361.6	46358	158611	96209.4	161102	160477	192010	0	118059	184159	215726	155142	289430	166184	177064
sp|P11349|NARH_ECOLI	P11349	narH	Respiratory nitrate reductase 1 beta chain	75389.3	147856	358312	104094	89257.9	109919	45660.7	0	6156.16	32513.3	144653	74177.2	427630	326835	174293
sp|P12295|UNG_ECOLI	P12295	ung	Uracil-DNA glycosylase	0	7601.48	34114.3	11158.9	43102.5	17249.3	158612	3830.92	13860.1	55450.1	58422.8	13460.7	56791.7	21243.1	22042.9
sp|P13033|GLPB_ECOLI	P13033	glpB	Anaerobic glycerol-3-phosphate dehydrogenase subunit B	47809.3	47001	104499	129804	133988	175797	127172	0	122038	205231	227111	119758	270675	126604	158060
sp|P13445|RPOS_ECOLI	P13445	rpoS	RNA polymerase sigma factor RpoS	44746.9	72909.8	34930.4	66518.3	162271	169936	49580.4	0	18070.4	61772.2	75243.3	38963.8	71232.8	46280.9	38499.1
sp|P14081|SELB_ECOLI	P14081	selB	Selenocysteine-specific elongation factor	0	29745.7	17548	31927.7	49653.7	33781.1	149472	16745.6	33826.1	74922.4	52681.4	62730.8	138854	27810.1	37918.8
sp|P15082|SRLR_ECOLI	P15082	srlR	Glucitol operon repressor	12578.1	32473.8	42867.3	33974.2	56626.1	49879.8	140344	0	15921.4	14677.3	65196.5	97764.1	91299.9	50001.2	116035
sp|P15977|MALQ_ECOLI	P15977	malQ	4-alpha-glucanotransferase	7535.27	22313	64267.3	37402.2	64810.2	45095.5	123540	0	59385.1	78661.2	89570.7	64346.1	125585	68629.9	47972.6
sp|P17115|GUTQ_ECOLI	P17115	gutQ	Arabinose 5-phosphate isomerase GutQ	33113.9	29548.9	81593.1	54759	72455.2	77296.7	123859	11550.3	42384.1	86596.1	110887	71034.8	86201.9	103699	132680
sp|P17443|MURG_ECOLI	P17443	murG	UDP-N-acetylglucosamine--N-acetylmuramyl-(pentapeptide) pyrophosphoryl-undecaprenol N-acetylglucosamine transferase	8747.67	10946.8	26548.1	20241.7	10738.2	14267.9	11982.8	0	16309	69474.7	63744.4	53723.7	18305.3	16526	168114
sp|P17846|CYSI_ECOLI	P17846	cysI	Sulfite reductase [NADPH] hemoprotein beta-component	102698	188673	406086	374827	542079	406537	52081.7	0	189596	565332	475191	294169	693020	534856	561072
sp|P17854|CYSH_ECOLI	P17854	cysH	Phosphoadenosine 5'-phosphosulfate reductase	174467	143282	285514	246131	237852	176757	22200.7	0	161957	146407	256961	217528	411564	233142	242973
sp|P21177|FADB_ECOLI	P21177	fadB	Fatty acid oxidation complex subunit alpha	18242.5	31921.2	28753.8	209075	205732	172688	86695.7	0	17681.7	275485	409812	158511	62566.7	29294.9	33672.4
sp|P22106|ASNB_ECOLI	P22106	asnB	Asparagine synthetase B [glutamine-hydrolyzing]	9248.52	10479.6	18065.5	45992	90863.9	27186.3	167878	0	19060.3	136754	193161	75843.5	103104	65643.6	83575.5
sp|P22524|MUKE_ECOLI	P22524	mukE	Chromosome partition protein MukE	0	18018.6	62912.8	50925.7	61386.8	58898.9	130058	18363.8	44528.7	73123.9	90115.2	57032.9	87694.2	70718.8	72484.1
sp|P23522|GARL_ECOLI	P23522	garL	5-keto-4-deoxy-D-glucarate aldolase	64505.3	108942	152780	143865	172442	144825	96038.7	0	142601	558832	585054	356426	298203	150825	102582
sp|P23524|GLXK1_ECOLI	P23524	garK	Glycerate 2-kinase	32322.1	43791.4	76507.1	34768.8	39223.3	82461.4	15897.2	0	79102.9	218931	156903	162251	58088.2	63967.5	52916.7
sp|P23830|PSS_ECOLI	P23830	pssA	CDP-diacylglycerol--serine O-phosphatidyltransferase	32284.8	34887.3	21698.8	58469.1	34646.7	37464.6	57280.8	0	9405.73	145029	123347	54522.1	156832	84373.8	66870.4
sp|P23857|PSPE_ECOLI	P23857	pspE	Thiosulfate sulfurtransferase PspE	19033.9	121651	300537	318754	594208	562607	48089.8	0	142306	477420	771126	548792	598881	415052	535929
sp|P23909|MUTS_ECOLI	P23909	mutS	DNA mismatch repair protein MutS	46258	7339.36	40150.8	23824.3	28039	59621.5	153394	0	37009.2	72870.2	104112	56266.4	149826	102170	115644
sp|P24173|RFAC_ECOLI	P24173	rfaC	Lipopolysaccharide heptosyltransferase 1	4387.95	9276.78	36979.2	15619.6	36881.2	18354.6	64619.8	0	16591.8	50582.3	22754	35395.3	25643.6	18205	21809
sp|P24178|YFFB_ECOLI	P24178	yffB	Protein YffB	18102.1	25192.1	50958.5	26063	48792.3	51522.5	40396.2	0	34306.2	51430.3	55602.8	60470.9	34351.1	48665.3	52764.8
sp|P24202|MRR_ECOLI	P24202	mrr	Type IV methyl-directed restriction enzyme EcoKMrr	23422.8	21388	44888.3	38334	58042.8	39083.7	56882.2	0	36567.9	69107.3	101334	87146.6	115213	48120.4	37516.4
sp|P25522|MNME_ECOLI	P25522	mnmE	tRNA modification GTPase MnmE	9309.14	0	40993.8	41049.5	89295.1	56124.3	119130	8332.31	25320.8	108206	65676.8	85080.7	117589	77348.5	30840.8
sp|P25526|GABD_ECOLI	P25526	gabD	Succinate-semialdehyde dehydrogenase [NADP(+)] GabD	16325.7	7107.07	41623	91698.2	122607	104264	131643	0	3060.7	406093	419889	244767	68945.5	26804.3	21005.7
sp|P26608|FLIS_ECOLI	P26608	fliS	Flagellar secretion chaperone FliS	32196.5	51976.9	145763	76054.3	101947	110109	82815.1	0	98021.5	153972	184700	106816	232594	117798	135761
sp|P27830|RMLB2_ECOLI	P27830	rffG	dTDP-glucose 4,6-dehydratase 2	14520.8	12704.5	18287.9	17058.5	20269.9	16100	177396	11668.2	20963.4	81098.5	63985.2	15068.9	199379	36420.8	20858.5
sp|P27833|WECE_ECOLI	P27833	wecE	dTDP-4-amino-4,6-dideoxygalactose transaminase	4561.89	6913.16	56813.8	26242.9	44235.9	47706.7	108298	0	61539.1	79795.6	57727.3	65904.5	20294.6	64735.6	34839.9
sp|P28905|HOLC_ECOLI	P28905	holC	DNA polymerase III subunit chi	26851.3	54233.5	84741.7	60334.8	78524	91903.7	66284.8	9741.55	68163	0	26296.1	72026.1	32360.8	55098.4	54614.7
sp|P30958|MFD_ECOLI	P30958	mfd	Transcription-repair-coupling factor	12816.2	89423	137617	57952.7	57318.5	59259.1	27540.7	0	33359	130683	190424	184142	499819	243531	232509
sp|P31550|THIB_ECOLI	P31550	thiB	Thiamine-binding periplasmic protein	15111.3	40640.8	82777.2	75422.7	130225	78717.8	58079.9	0	118453	142941	168505	75371.9	154775	137989	100065
sp|P31554|LPTD_ECOLI	P31554	lptD	LPS-assembly protein LptD	3760.13	9370.76	18421.3	9922.63	23257.3	74211.6	31772.5	0	4435.76	10276.1	17807.3	26906.3	93626	47449.3	105517
sp|P32680|YJAG_ECOLI	P32680	yjaG	Uncharacterized protein YjaG	0	53110.9	55612.2	57395.3	86738.9	49922.1	180285	20669.9	94258.9	38036.4	72531.3	96868.2	150982	79308.7	107660
sp|P33014|YEED_ECOLI	P33014	yeeD	Putative sulfur carrier protein YeeD	6462.11	36655.3	165956	37691.9	167171	114849	26853.1	0	59690.8	111189	124820	75769.7	408479	169209	171901
sp|P33235|FLGK_ECOLI	P33235	flgK	Flagellar hook-associated protein 1	206054	290580	548543	550502	496376	529097	178507	0	384100	375070	370921	385577	531217	317460	412796
sp|P36649|CUEO_ECOLI	P36649	cueO	Multicopper oxidase CueO	23649.6	43809.2	128596	62871.8	103707	104802	102783	13972.7	88007.8	171537	199482	109773	80907.4	138213	88831.4
sp|P36672|PTTBC_ECOLI	P36672	treB	PTS system trehalose-specific EIIBC component	128756	183587	252557	279794	231751	206674	52607.3	0	207457	86760.2	117733	72068.9	210257	207579	244591
sp|P36929|RSMB_ECOLI	P36929	rsmB	Ribosomal RNA small subunit methyltransferase B	0	15706.6	20203.9	23581.2	33634.5	32450.2	150239	9986.75	19547.2	49631.2	75797.7	27937.4	141305	39405.2	43720
sp|P36995|CSPB_ECOLI	P36995	cspB	Cold shock-like protein CspB	28721.1	21356.2	28063.9	38352.7	55632	0	35746.8	28478.1	41141.6	60098.3	50448.2	43694.8	58874.4	70921.9	60511.5
sp|P37051|PURU_ECOLI	P37051	purU	Formyltetrahydrofolate deformylase	25805.9	31271.3	16107.7	67483.8	47630	34114.3	128031	0	59103.8	76026.4	112587	30469.5	286969	54843.5	72260.5
sp|P37590|PMRD_ECOLI	P37590	pmrD	Signal transduction protein PmrD	26625	40135.3	50764.6	43869.2	57383.3	74824.7	48458.6	0	51723.9	80781.5	77931.1	82447.7	81273.9	64130.4	67314.2
sp|P37595|IAAA_ECOLI	P37595	iaaA	Isoaspartyl peptidase	52266.8	93303.5	165081	84890.7	158448	133101	15374.4	0	59816.3	199979	159406	195648	169556	126438	123241
sp|P37634|RLMJ_ECOLI	P37634	rlmJ	Ribosomal RNA large subunit methyltransferase J	0	49568.2	54475.3	47733.4	114505	23504.3	279764	35896.8	101385	1.45741e+06	165286	61073.3	277556	159520	81783.9
sp|P37646|PDEH_ECOLI	P37646	pdeH	Cyclic di-GMP phosphodiesterase PdeH	9386.76	14888.5	20975.1	58087.9	63859.7	50720.3	24741.5	0	17685.5	32169.1	37276.4	25346	201171	94636.4	90092.1
sp|P37750|WBBJ_ECOLI	P37750	wbbJ	Putative lipopolysaccharide biosynthesis O-acetyl transferase WbbJ	0	30177.9	42247.7	11541.7	16132.1	16112.7	44684.8	15505.5	57178.6	47530.9	71132.1	13744.7	78625.7	46628.9	44220.1
sp|P37751|WBBK_ECOLI	P37751	wbbK	Putative glycosyltransferase WbbK	22265	14593.3	20728.4	45471.2	27578.8	138107	56329.8	0	32651	34146.1	38749	24018.1	114900	29252.5	64428.6
sp|P37774|TCYN_ECOLI	P37774	tcyN	L-cystine transport system ATP-binding protein TcyN	28747.9	29339	84982.1	55522	74981.7	65648.3	29018	0	62854	87548.3	117120	94878.2	44086.6	59164.8	74350.7
sp|P38038|CYSJ_ECOLI	P38038	cysJ	Sulfite reductase [NADPH] flavoprotein alpha-component	34269.3	47003.1	60704	91642.5	93415.5	114470	0	6343.71	24995	136466	203974	86079.9	398765	88618.6	76452.5
sp|P39187|YTFJ_ECOLI	P39187	ytfJ	Uncharacterized protein YtfJ	30530	42232	63791.1	61748.1	102707	103422	54024.2	0	58319.6	153000	234025	96414.8	202753	164015	89579.8
sp|P39267|YJCZ_ECOLI	P39267	yjcZ	Uncharacterized protein YjcZ	34900.3	63198.1	117267	150239	164346	169079	38806.6	0	72979.7	118277	181153	121772	186127	202718	158053
sp|P39371|NANM_ECOLI	P39371	nanM	N-acetylneuraminate epimerase	98991.2	78460	325036	329861	415309	330588	42606.8	0	209460	839958	918220	743949	228482	220731	204379
sp|P39401|OPGB_ECOLI	P39401	mdoB	Phosphoglycerol transferase I	17790.4	35347.9	52187.6	70853.8	12080.9	71326.6	42952.9	0	5805.38	18444.6	38097.1	31911.9	52236.9	71626.9	52971.5
sp|P40120|OPGD_ECOLI	P40120	mdoD	Glucans biosynthesis protein D	73885.3	71039.3	184041	148551	127623	230285	125721	0	117667	114652	63224.2	217289	222614	148519	162500
sp|P45424|NANQ_ECOLI	P45424	nanQ	N-acetylneuraminate anomerase NanQ	114005	113346	155199	91684.9	101982	111578	33242.3	18745.7	129121	87386.4	83379.6	233916	0	89634	101308
sp|P45531|TUSC_ECOLI	P45531	tusC	Protein TusC	0	13950.6	25963.7	19682.7	24587.3	21795.1	22584.8	7402.09	21492.1	22878.9	27931.3	29512.5	63011.4	24721.8	20194.8
sp|P52007|YECM_ECOLI	P52007	yecM	Protein YecM	23968.8	49827.1	0	37618.1	65038.4	68269.9	102153	35298	77345.5	114824	107104	79452.5	60420.7	90811.6	55260.9
sp|P52612|FLII_ECOLI	P52612	fliI	Flagellum-specific ATP synthase	32202.8	39166.1	99007.9	70414	96909.1	122247	52802.3	0	70500.2	189658	144627	103661	28059.2	81577.3	101218
sp|P52613|FLIJ_ECOLI	P52613	fliJ	Flagellar FliJ protein	131501	143447	245520	47951.4	97332.5	67022.7	26777.2	0	158561	102004	126226	152219	112429	119309	146494
sp|P52614|FLIK_ECOLI	P52614	fliK	Flagellar hook-length control protein	33771.9	25528	63271.5	24459.8	28491	28763.4	16666.3	0	36425.8	29761.8	16931.9	40186.8	52456.4	39630.2	41609.2
sp|P52627|FLIZ_ECOLI	P52627	fliZ	Regulator of sigma S factor FliZ	7992.71	21181.4	45447.3	33035.6	41392.7	64261.3	67426.7	0	49227.4	87997.9	64236.8	58234.1	157828	102040	96839.6
sp|P56580|PTHB_ECOLI	P56580	srlE	PTS system glucitol/sorbitol-specific EIIB component	21806.5	43062.5	68460.6	31848.3	25950.2	23857.9	30642.6	0	50537.2	28954.1	30918.5	24981.7	63375	43690.4	39998.7
sp|P60664|HIS6_ECOLI	P60664	hisF	Imidazole glycerol phosphate synthase subunit HisF	18487.7	32100.8	101249	55153.5	87929.4	92915.1	135719	0	97717.4	142106	156301	84308.3	132998	86852.1	91544.4
sp|P60757|HIS1_ECOLI	P60757	hisG	ATP phosphoribosyltransferase	0	37856.5	59384.2	52379.4	68650.6	123384	111030	12095.4	53983.8	94219.6	95955	58132.5	29802.8	69530.9	70009.3
sp|P61320|LOLB_ECOLI	P61320	lolB	Outer-membrane lipoprotein LolB	17619.1	33240.1	277707	81254.6	244296	361054	18248	0	26592	102369	263200	268909	45849.8	22934.9	23959.8
sp|P62617|ISPF_ECOLI	P62617	ispF	2-C-methyl-D-erythritol 2,4-cyclodiphosphate synthase	18243.8	27482.6	88674.3	50271.9	91871	93787.8	101879	27207.3	72441.7	55413	77065.9	51627.1	172541	131393	118356
sp|P63386|MLAF_ECOLI	P63386	mlaF	Intermembrane phospholipid transport system ATP-binding protein MlaF	29631.4	9165.23	18757.9	79183.6	22746.8	0	119461	32992.2	54618.8	60810.2	26479.6	28935	46606.5	42288.9	36681.4
sp|P63389|YHES_ECOLI	P63389	yheS	Probable ATP-binding protein YheS	6956.85	19679.3	8616.01	43797.7	46775.1	25990.3	62584.2	0	29679.3	61481.5	36472.5	22606.5	91535.2	66825.1	52926.8
sp|P63883|AMIC_ECOLI	P63883	amiC	N-acetylmuramoyl-L-alanine amidase AmiC	39729	23251.1	169996	70404.4	101537	99032.6	52876.7	0	90735.3	83266.8	105473	87175.3	57082.4	90014.9	156029
sp|P64636|YRFG_ECOLI	P64636	yrfG	GMP/IMP nucleotidase YrfG	10274.3	11368.5	29804.4	24241.8	35876.5	33071.7	96806	0	62480.9	20959.1	21665.7	15847.8	73681	61835.6	51749.8
sp|P68567|RSMJ_ECOLI	P68567	rsmJ	Ribosomal RNA small subunit methyltransferase J	0	9327.02	26919.6	16487.2	27411.1	37236.9	112783	6049.72	30453.7	86577.6	93326.1	50093.9	127376	37560.9	31050
sp|P69922|FUCI_ECOLI	P69922	fucI	L-fucose isomerase	44147.8	36690.9	116113	22324.5	62972.7	56454.1	95976.4	0	18448.5	55446.1	84847.5	31573.9	231768	100399	119267
sp|P75682|YAGE_ECOLI	P75682	yagE	Putative 2-dehydro-3-deoxy-D-gluconate aldolase YagE	28400	25442.3	66942.7	29762.8	28520.8	58798.7	36418.9	0	29768	69667.5	72600.5	31850.7	89912.6	77577.8	33362.6
sp|P75818|YBJP_ECOLI	P75818	ybjP	Uncharacterized lipoprotein YbjP	49050.2	45524.5	154684	65686.7	115548	156050	74148	30700.9	48065.6	189529	129846	256205	15387	0	35557.2
sp|P75933|FLGA_ECOLI	P75933	flgA	Flagella basal body P-ring formation protein FlgA	14884.1	56910.1	64297.6	32168.3	46292.2	46941	45693.6	0	41106.6	47713.4	46358.8	40459.6	152227	64812.9	97864
sp|P75936|FLGD_ECOLI	P75936	flgD	Basal-body rod modification protein FlgD	22136.6	50078.2	164880	83526.8	161820	144968	77218.9	0	85859.3	159982	223597	129661	390160	175618	197163
sp|P75952|COMR_ECOLI	P75952	comR	HTH-type transcriptional repressor ComR	26160.9	45621.3	28965.8	46384.2	24266.1	25407.3	23307.3	0	25147.3	15668.7	36004.6	30886.2	84156.5	51109.2	49399.9
sp|P76010|YCGR_ECOLI	P76010	ycgR	Flagellar brake protein YcgR	47141.9	74282.3	74619.1	402535	278471	222505	26366.8	0	42530.1	253348	226492	108515	479921	343392	161635
sp|P76027|OPPD_ECOLI	P76027	oppD	Oligopeptide transport ATP-binding protein OppD	12462.4	10353	15845.6	15640.9	19590.3	18383.9	10540.8	0	14144.3	64202.4	74263.1	19741.3	100320	56645.2	17890.5
sp|P76034|YCIT_ECOLI	P76034	yciT	Uncharacterized HTH-type transcriptional regulator YciT	13186.2	30576.5	38641	46698	37271.5	33508	111137	5733.05	41149.1	116898	137088	50745.6	116133	86439.1	46422.6
sp|P76143|LSRF_ECOLI	P76143	lsrF	3-hydroxy-5-phosphonooxypentane-2,4-dione thiolase	24697.6	18532.1	52273.5	37476.7	65994.7	31299.5	117509	36226.2	28046.4	65090	28880.7	54965.1	34725.8	28361.1	44230.3
sp|P76297|FLHE_ECOLI	P76297	flhE	Flagellar protein FlhE	24510.9	18589.4	111017	39548.7	49551.7	94210.2	19564.9	0	13756.9	101671	31866.9	50361	86288.8	80324.4	79732.1
sp|P76346|MTFA_ECOLI	P76346	mtfA	Protein MtfA	40173.8	73744.3	136317	97734.4	117507	116393	88387.3	0	88113.9	150169	188821	114842	126456	112305	99301.6
sp|P76536|YFEX_ECOLI	P76536	yfeX	Dye-decolorizing peroxidase YfeX	29302.7	51103.1	51374.5	67436.2	88941.4	67056.4	228022	18001.7	80044.3	143876	208578	98430.4	185046	178756	82128
sp|P76541|EUTL_ECOLI	P76541	eutL	Bacterial microcompartment shell protein EutL	14246.3	16109.6	95890.4	13055.6	91296.9	90811.6	73831.6	0	27627.5	59059.4	73780.6	83007.6	129156	46212.4	47829.4
sp|P77252|YKGE_ECOLI	P77252	ykgE	Uncharacterized protein YkgE	107628	139527	259564	123356	166506	179260	17001.2	0	195282	10570.8	41643.5	33454.4	256941	246905	216354
sp|P77318|YDEN_ECOLI	P77318	ydeN	Uncharacterized sulfatase YdeN	350015	452202	1.33977e+06	536508	951946	753652	153080	0	496849	917450	1.17756e+06	971481	1.28056e+06	697276	793947
sp|P77433|YKGG_ECOLI	P77433	ykgG	Uncharacterized protein YkgG	74601.6	129984	244843	123617	269300	272376	11035.1	0	162985	44944.6	71207.5	52298.1	370422	161102	196550
sp|P77554|YAHJ_ECOLI	P77554	yahJ	Uncharacterized protein YahJ	13107.4	16756.1	74688.4	58065.4	73381.7	83522.4	73260.3	0	33650.6	72493.1	85792.8	44166.5	72682.9	68588.7	44805.7
sp|P77581|ASTC_ECOLI	P77581	astC	Succinylornithine transaminase	7836.12	0	33141.2	136643	152802	130583	160784	5317.23	10768	427462	516431	1.01993e+06	43100.2	76199.3	26874.1
sp|P77609|FLXA_ECOLI	P77609	flxA	Protein FlxA	20520.7	39361.8	59738.7	43260.7	52196.8	51712.1	9973.57	0	52602.3	42178.2	35795.2	42075.1	152601	107049	98995.2
sp|P77625|HXPA_ECOLI	P77625	hxpA	Hexitol phosphatase A	15931.5	20252	82304.1	31082.9	79030.1	75233.9	111482	0	61338.9	119620	128716	62012.6	160640	85726	75100.3
sp|P77717|YBAY_ECOLI	P77717	ybaY	Uncharacterized lipoprotein YbaY	0	14766.2	119809	67059.3	125358	146089	116680	8339.31	39261.7	153141	233531	201873	52930.3	52112.4	47393
sp|P77737|OPPF_ECOLI	P77737	oppF	Oligopeptide transport ATP-binding protein OppF	21849.7	45559.7	41175.2	125783	139594	73324.9	63905.1	0	41962.2	204528	213744	89471.5	170143	115936	33167
sp|P77756|QUEC_ECOLI	P77756	queC	7-cyano-7-deazaguanine synthase	0	27507.1	64509.3	43009.2	64832.1	47769.6	225056	14372.7	89646	154448	149521	74011.1	217180	129611	76708.3
sp|P77791|MAA_ECOLI	P77791	maa	Maltose O-acetyltransferase	56158.6	46017.2	155344	107172	244149	178598	227156	0	139392	165033	114963	110549	324972	185240	120963
sp|Q46864|MQSA_ECOLI	Q46864	mqsA	Antitoxin MqsA	15555.1	29233.4	69306.1	45488.5	73496.5	106985	59539.5	0	49920.9	46872.5	46808.3	66406.3	72724	62057.5	73227.6
sp|Q46871|YQJH_ECOLI	Q46871	yqjH	NADPH-dependent ferric-chelate reductase	34299.8	50629.8	124536	51177.7	193498	170821	156582	32466.4	136130	98417.5	0	81479	40919.4	141566	142691
sp|Q47690|MMUM_ECOLI	Q47690	mmuM	Homocysteine S-methyltransferase	36903.5	55581.2	64232.6	53753	63464.1	51908.9	23819.1	0	65890	68241.4	77491.9	69583.4	32809.3	52672.1	21135.4
